# Supplementary material for: Response of soil viral communities to land use changes
Source: Nat Commun. 2022 Oct 12;13:6027. doi: 10.1038/s41467-022-33771-2 (PMC9556555; doi:10.1038/s41467-022-33771-2)
Supplement: Supplementary file 10 — Dataset 7 [file 41467_2022_33771_MOESM10_ESM.xlsx]

## Sheet: Sheet1
Locustag	FO	UG	AG	enrich	host
B19_NODE_1001_length_44052_cov_19.073482	0	0.000116165	0	UG_enriched	Acidobacteriia
B19_NODE_1002_length_44021_cov_13.513715	0	8.06027e-05	0	UG_enriched	Actinobacteria
B19_NODE_1003_length_44010_cov_41.396383	0	0.000242215	0	UG_enriched	Thermoleophilia
B19_NODE_1005_length_44004_cov_27.507293	0	0.000163809	0	UG_enriched	Chitinophagia
B19_NODE_1006_length_43974_cov_13.666158	0	7.91475e-05	0	UG_enriched	Actinobacteria
B19_NODE_1007_length_43954_cov_19.145789	0	0.000417417	0	UG_enriched	NAmissing
B19_NODE_1009_length_43905_cov_45.214253	0.000188229	0.000296893	0	UG_enriched	Actinobacteria
B19_NODE_1010_length_43904_cov_18.621565	0	0.000235532	0	UG_enriched	Betaproteobacteria
B19_NODE_1011_length_43899_cov_18.260446	0	0.000106148	0	UG_enriched	Gammaproteobacteria
B19_NODE_1012_length_43898_cov_13.674338	0	8.20638e-05	0	UG_enriched	Verrucomicrobiae
B19_NODE_1013_length_43885_cov_27.718298	0	0.000164408	0	UG_enriched	Actinobacteria
B19_NODE_1014_length_43857_cov_130.648623	0	0.000764494	0	UG_enriched	Gammaproteobacteria
B19_NODE_1015_length_43850_cov_12.934901	0	7.85985e-05	0	UG_enriched	Gammaproteobacteria
B19_NODE_1016_length_43843_cov_11.729332	0	6.89489e-05	0	UG_enriched	Bacilli
B19_NODE_1017_length_43838_cov_36.637485	0	0.000218737	0	UG_enriched	Sphingobacteriia
B19_NODE_1018_length_43824_cov_18.201992	0	0.000254874	0	UG_enriched	NAmissing
B19_NODE_1019_length_43816_cov_55.684262	0	0.000331422	0	UG_enriched	Actinobacteria
B19_NODE_101_length_74818_cov_21.175929	0	0.000125446	0	UG_enriched	Halobacteria
B19_NODE_1021_length_43789_cov_16.091714	0	0.000383098	0	UG_enriched	Betaproteobacteria
B19_NODE_1022_length_43783_cov_20.732666	0	0.000121136	0	UG_enriched	Betaproteobacteria
B19_NODE_1023_length_43777_cov_78.568661	0	0.000892095	0	UG_enriched	Betaproteobacteria
B19_NODE_1029_length_43707_cov_45.286150	0	0.00112191	0	UG_enriched	NAmissing
B19_NODE_1030_length_43701_cov_14.118865	0	0.000132692	0	UG_enriched	Gammaproteobacteria
B19_NODE_1033_length_43675_cov_14.375997	0	8.59357e-05	0	UG_enriched	Bacilli
B19_NODE_1034_length_43670_cov_14.698682	0	8.50919e-05	0	UG_enriched	Betaproteobacteria
B19_NODE_1035_length_43669_cov_13.611593	0	0.000133416	0	UG_enriched	Alphaproteobacteria
B19_NODE_1036_length_43665_cov_22.006604	0	0.000277755	0	UG_enriched	Verrucomicrobiae
B19_NODE_1037_length_43659_cov_133.663724	0	0.000931305	0	UG_enriched	Acidobacteriia
B19_NODE_1038_length_43656_cov_39.259283	0	0.00148505	0	UG_enriched	Alphaproteobacteria
B19_NODE_1039_length_43655_cov_23.484220	0	0.000137133	0	UG_enriched	Gammaproteobacteria
B19_NODE_103_length_74012_cov_67.022716	0	0.000668997	0	UG_enriched	Verrucomicrobiae
B19_NODE_1040_length_43651_cov_11.878108	0	6.59526e-05	0	UG_enriched	Deltaproteobacteria
B19_NODE_1041_length_43634_cov_14.149384	0	8.7298e-05	0	UG_enriched	Bacilli
B19_NODE_1042_length_43629_cov_14.764814	0	8.89392e-05	0	UG_enriched	Verrucomicrobiae
B19_NODE_1045_length_43620_cov_3621.118352	0	0.011224	0	UG_enriched	Chitinophagia
B19_NODE_1046_length_43620_cov_295.596580	0	0.00174241	0	UG_enriched	Clostridia
B19_NODE_1047_length_43616_cov_47.061293	0	0.000277581	0	UG_enriched	Gammaproteobacteria
B19_NODE_1049_length_43615_cov_15.949908	0	0.000139866	0	UG_enriched	Actinobacteria
B19_NODE_104_length_73951_cov_23.999269	0	0.00014204	0	UG_enriched	Actinobacteria
B19_NODE_1050_length_43612_cov_50.083569	0	0.000295362	0	UG_enriched	Gammaproteobacteria
B19_NODE_1051_length_43601_cov_12.827332	0	7.56274e-05	0	UG_enriched	Clostridia
B19_NODE_1052_length_43595_cov_17.132407	0	0.000195293	0	UG_enriched	Bacilli
B19_NODE_1053_length_43588_cov_18.282705	0	0.000114369	0	UG_enriched	Actinobacteria
B19_NODE_1054_length_43581_cov_14.456991	0	8.21552e-05	0	UG_enriched	Acidobacteriia
B19_NODE_1055_length_43579_cov_15.755813	0	0.000150042	0	UG_enriched	Spirochaetia
B19_NODE_1056_length_43577_cov_29.705620	0	0.000178052	0	UG_enriched	Bacilli
B19_NODE_1057_length_43547_cov_38.371747	0	0.000226852	0	UG_enriched	Thermococci
B19_NODE_1058_length_43541_cov_14.188221	0	8.74066e-05	0	UG_enriched	Actinobacteria
B19_NODE_105_length_73874_cov_11.053293	0	0.000177901	0	UG_enriched	Deltaproteobacteria
B19_NODE_1060_length_43518_cov_10.736995	0	6.40905e-05	0	UG_enriched	Actinobacteria
B19_NODE_1061_length_43509_cov_17.553689	0	0.000186436	0	UG_enriched	Actinobacteria
B19_NODE_1062_length_43504_cov_61.741467	0	0.000601902	0	UG_enriched	Betaproteobacteria
B19_NODE_1063_length_43500_cov_20.587110	0	0.000134739	0	UG_enriched	NAmissing
B19_NODE_1064_length_43484_cov_19.024753	0	0.000113396	0	UG_enriched	Cytophagia
B19_NODE_1065_length_43457_cov_15.083176	0	0.000145194	0	UG_enriched	Deltaproteobacteria
B19_NODE_1066_length_43454_cov_14.674877	0	0.000137409	0	UG_enriched	Gammaproteobacteria
B19_NODE_1068_length_43430_cov_29.636150	0	0.000172412	0	UG_enriched	Bacilli
B19_NODE_1069_length_43404_cov_13.857229	0	8.49107e-05	0	UG_enriched	Gammaproteobacteria
B19_NODE_106_length_73856_cov_67.650723	0	0.00043005	0	UG_enriched	Acidimicrobiia
B19_NODE_1071_length_43402_cov_53.955268	0	0.000319318	0	UG_enriched	Ktedonobacteria
B19_NODE_1072_length_43393_cov_23.340394	0	0.000133588	0	UG_enriched	Tissierellia
B19_NODE_1073_length_43388_cov_15.479150	0	9.0761e-05	0	UG_enriched	Gammaproteobacteria
B19_NODE_1074_length_43383_cov_19.552830	0	0.00013065	0	UG_enriched	Cytophagia
B19_NODE_1075_length_43380_cov_20.073676	0	0.00012273	0	UG_enriched	Planctomycetia
B19_NODE_1076_length_43372_cov_44.386476	0	0.000257225	0	UG_enriched	Acidobacteriia
B19_NODE_1077_length_43364_cov_17.800180	0	0.000111678	0	UG_enriched	Betaproteobacteria
B19_NODE_1079_length_43354_cov_42.554170	0	0.000387818	0	UG_enriched	Alphaproteobacteria
B19_NODE_1080_length_43347_cov_20.064769	0	0.000461504	0	UG_enriched	Acidobacteriia
B19_NODE_1081_length_43347_cov_14.405502	0	0.000148071	0	UG_enriched	Alphaproteobacteria
B19_NODE_1082_length_43329_cov_17.657762	0	0.000157407	0	UG_enriched	Gammaproteobacteria
B19_NODE_1084_length_43326_cov_13.031407	0	7.35262e-05	0	UG_enriched	Betaproteobacteria
B19_NODE_1085_length_43324_cov_47.420301	0	0.000276988	0	UG_enriched	Gammaproteobacteria
B19_NODE_1086_length_43308_cov_44.869050	0	0.000300268	0	UG_enriched	Betaproteobacteria
B19_NODE_1089_length_43273_cov_85.180342	0	0.000608518	0	UG_enriched	NAmissing
B19_NODE_108_length_73680_cov_23.558465	0	0.000247352	0	UG_enriched	Alphaproteobacteria
B19_NODE_1090_length_43263_cov_11.602643	0	6.86983e-05	0	UG_enriched	Alphaproteobacteria
B19_NODE_1091_length_43260_cov_22.578498	0	0.000128515	0	UG_enriched	Acidobacteriia
B19_NODE_1092_length_43257_cov_33.299245	0	0.000201462	0	UG_enriched	Bacilli
B19_NODE_1093_length_43257_cov_15.645803	0	9.44047e-05	0	UG_enriched	Cytophagia
B19_NODE_1094_length_43248_cov_18.715000	0	0.000114406	0	UG_enriched	Actinobacteria
B19_NODE_1097_length_43201_cov_24.201154	0	0.000142967	0	UG_enriched	Gammaproteobacteria
B19_NODE_1098_length_43191_cov_74.009343	0	0.000514652	0	UG_enriched	Acidobacteriia
B19_NODE_1099_length_43149_cov_14.622407	0	8.60801e-05	0	UG_enriched	Oligoflexia
B19_NODE_109_length_73618_cov_52.017305	0	0.000601762	0	UG_enriched	Actinobacteria
B19_NODE_1100_length_43146_cov_19.187464	0	0.000115384	0	UG_enriched	Bacilli
B19_NODE_1102_length_43101_cov_19.218975	0	0.00011173	0	UG_enriched	Gammaproteobacteria
B19_NODE_1103_length_43093_cov_17.301129	0	0.000105105	0	UG_enriched	Actinobacteria
B19_NODE_1105_length_43055_cov_13.105163	0	8.35918e-05	0	UG_enriched	Acidobacteriia
B19_NODE_1106_length_43053_cov_9.153821	0	5.05353e-05	0	UG_enriched	Bacilli
B19_NODE_1107_length_43046_cov_12.320369	0	0.000129127	0	UG_enriched	Deltaproteobacteria
B19_NODE_1108_length_43044_cov_34.057875	0	0.000518226	0	UG_enriched	Bacilli
B19_NODE_1109_length_43036_cov_19.974733	0	0.000120285	0	UG_enriched	Actinobacteria
B19_NODE_110_length_73490_cov_14.080820	0	8.25444e-05	0	UG_enriched	Alphaproteobacteria
B19_NODE_1110_length_43029_cov_17.999046	0	0.000109397	0	UG_enriched	Gammaproteobacteria
B19_NODE_1114_length_42987_cov_13.896744	0	8.43547e-05	0	UG_enriched	Bacilli
B19_NODE_1115_length_42961_cov_27.481355	0	0.000166445	0	UG_enriched	Betaproteobacteria
B19_NODE_111_length_73465_cov_65.313036	0	0.000531981	0	UG_enriched	Acidobacteriia
B19_NODE_1120_length_42934_cov_15.655216	0	0.000250713	0	UG_enriched	Actinobacteria
B19_NODE_1121_length_42928_cov_16.674410	0	9.86807e-05	0	UG_enriched	Sphingobacteriia
B19_NODE_1122_length_42927_cov_39.834717	0	0.000281367	0	UG_enriched	Acidobacteriia
B19_NODE_1123_length_42924_cov_60.859432	0	0.000448217	0	UG_enriched	Acidobacteriia
B19_NODE_1124_length_42919_cov_26.347751	0	0.000316517	0	UG_enriched	Planctomycetia
B19_NODE_1127_length_42899_cov_35.710415	0	0.000500941	0	UG_enriched	Betaproteobacteria
B19_NODE_1129_length_42881_cov_18.876080	0	0.000111473	0	UG_enriched	Verrucomicrobiae
B19_NODE_112_length_73207_cov_42.970008	0.000179022	0.000288367	0	UG_enriched	Actinobacteria
B19_NODE_1130_length_42874_cov_36.224176	0	0.00021164	0	UG_enriched	Betaproteobacteria
B19_NODE_1131_length_42873_cov_12.540614	0	7.29593e-05	0	UG_enriched	Flavobacteriia
B19_NODE_1133_length_42844_cov_17.552759	0	0.00010279	0	UG_enriched	Clostridia
B19_NODE_1135_length_42831_cov_29.239924	0	0.000176801	0	UG_enriched	Gammaproteobacteria
B19_NODE_1136_length_42830_cov_131.479462	0	0.000916067	0	UG_enriched	Actinobacteria
B19_NODE_1138_length_42822_cov_14.265298	0	8.66583e-05	0	UG_enriched	Bacteroidia
B19_NODE_1139_length_42816_cov_23.430486	0	0.000141008	0	UG_enriched	Gammaproteobacteria
B19_NODE_113_length_73194_cov_46.384938	0	0.000272966	0	UG_enriched	Planctomycetia
B19_NODE_1140_length_42814_cov_31.841133	0	0.000319484	0	UG_enriched	Gammaproteobacteria
B19_NODE_1141_length_42812_cov_34.564890	0	0.000204427	0	UG_enriched	Cytophagia
B19_NODE_1142_length_42800_cov_729.407276	0	0.00429706	0	UG_enriched	Cytophagia
B19_NODE_1143_length_42781_cov_24.681646	0	0.00014948	0	UG_enriched	Actinobacteria
B19_NODE_1144_length_42764_cov_23.130816	0	0.000173766	0	UG_enriched	Planctomycetia
B19_NODE_1145_length_42750_cov_27.466144	0	0.000160251	0	UG_enriched	Gammaproteobacteria
B19_NODE_1146_length_42743_cov_12.992433	0	0.00010828	0	UG_enriched	NAmissing
B19_NODE_1147_length_42741_cov_28.471841	0	0.000168808	0	UG_enriched	Gammaproteobacteria
B19_NODE_1148_length_42737_cov_17.069233	0	0.000103483	0	UG_enriched	Sphingobacteriia
B19_NODE_1149_length_42726_cov_33.720724	0	0.000200952	0	UG_enriched	Gammaproteobacteria
B19_NODE_114_length_73088_cov_14.565826	0	8.55487e-05	0	UG_enriched	Gammaproteobacteria
B19_NODE_1150_length_42713_cov_18.095363	0	0.000110603	0	UG_enriched	Acidobacteriia
B19_NODE_1152_length_42698_cov_16.423704	0	0.000105482	0	UG_enriched	Alphaproteobacteria
B19_NODE_1153_length_42666_cov_21.183615	0	0.000276093	0	UG_enriched	Actinobacteria
B19_NODE_1154_length_42666_cov_19.712422	0	0.000212455	0	UG_enriched	Acidobacteriia
B19_NODE_1155_length_42650_cov_13.300458	0	7.55656e-05	0	UG_enriched	Deltaproteobacteria
B19_NODE_1156_length_42642_cov_72.769155	0	0.000496014	0	UG_enriched	Gammaproteobacteria
B19_NODE_1157_length_42605_cov_18.995112	0	0.00011319	0	UG_enriched	Bacilli
B19_NODE_1159_length_42590_cov_12.171741	0	6.67203e-05	0	UG_enriched	Thermoleophilia
B19_NODE_115_length_73020_cov_51.526924	0	0.000476779	0	UG_enriched	Alphaproteobacteria
B19_NODE_1162_length_42528_cov_51.785699	0	0.000296994	0	UG_enriched	Cytophagia
B19_NODE_1163_length_42515_cov_12.286269	0	7.47295e-05	0	UG_enriched	Alphaproteobacteria
B19_NODE_1164_length_42504_cov_19.967914	0.000178002	0.00011023	0	FO_enriched	Betaproteobacteria
B19_NODE_1165_length_42476_cov_150.776856	0	0.000871408	0	UG_enriched	Deltaproteobacteria
B19_NODE_1166_length_42476_cov_84.543999	0	0.000600909	0	UG_enriched	Actinobacteria
B19_NODE_1167_length_42474_cov_15.067988	0	0.000149672	0	UG_enriched	Nitrospira
B19_NODE_1169_length_42453_cov_64.831572	0	0.000383293	0	UG_enriched	NAmissing
B19_NODE_116_length_72996_cov_37.580318	0	0.000333119	0	UG_enriched	NAmissing
B19_NODE_1170_length_42444_cov_15.174007	0	0.000133696	0	UG_enriched	Gammaproteobacteria
B19_NODE_1171_length_42436_cov_15.300111_fragment_1	0	8.46969e-05	0	UG_enriched	Thermoprotei
B19_NODE_1172_length_42432_cov_14.651462	0	8.46594e-05	0	UG_enriched	Acidobacteriia
B19_NODE_1173_length_42418_cov_64.965017	0	0.000475937	0	UG_enriched	Verrucomicrobiae
B19_NODE_1174_length_42406_cov_45.618805	0	0.000265442	0	UG_enriched	Acidobacteriia
B19_NODE_1176_length_42399_cov_77.429057	0	0.00060249	0	UG_enriched	Betaproteobacteria
B19_NODE_1177_length_42399_cov_13.540879	0	7.945e-05	0	UG_enriched	Alphaproteobacteria
B19_NODE_1178_length_42352_cov_43.298248	0	0.000258859	0	UG_enriched	Cytophagia
B19_NODE_1179_length_42345_cov_44.422582	0	0.000697804	0	UG_enriched	Deltaproteobacteria
B19_NODE_117_length_72681_cov_21.537645	0	0.00015114	0	UG_enriched	Betaproteobacteria
B19_NODE_1180_length_42326_cov_21.741880	0	0.000266012	0	UG_enriched	Gammaproteobacteria
B19_NODE_1181_length_42307_cov_11.795820	0	6.83281e-05	0	UG_enriched	Actinobacteria
B19_NODE_1182_length_42294_cov_27.894623	0	0.000236404	0	UG_enriched	Betaproteobacteria
B19_NODE_1184_length_42262_cov_20.572417	0	0.000120403	0	UG_enriched	Deltaproteobacteria
B19_NODE_1185_length_42253_cov_28.366913	0	0.00022379	0	UG_enriched	Verrucomicrobiae
B19_NODE_1186_length_42237_cov_17.431558	0	0.0001021	0	UG_enriched	Bacilli
B19_NODE_1187_length_42235_cov_26.994310	0	0.000196404	0	UG_enriched	Bacilli
B19_NODE_118_length_72513_cov_29.188164	0	0.000174697	0	UG_enriched	NAmissing
B19_NODE_1190_length_42205_cov_53.117367	0	0.00100948	0	UG_enriched	Actinobacteria
B19_NODE_1191_length_42197_cov_161.471240	0	0.000971898	0	UG_enriched	Bacilli
B19_NODE_1192_length_42195_cov_33.126815	0	0.000245132	0	UG_enriched	Betaproteobacteria
B19_NODE_1193_length_42189_cov_48.392130	0	0.000677427	0	UG_enriched	Ktedonobacteria
B19_NODE_1194_length_42186_cov_11.971968	0	7.46294e-05	0	UG_enriched	Acidobacteriia
B19_NODE_1195_length_42162_cov_17.544613	0	0.000103729	0	UG_enriched	Gammaproteobacteria
B19_NODE_1196_length_42147_cov_18.918274	0	0.000306282	0	UG_enriched	Acidobacteriia
B19_NODE_1197_length_42138_cov_185.950194	0	0.00493517	0	UG_enriched	Nitrospira
B19_NODE_1198_length_42132_cov_102.873470	0	0.00075438	0	UG_enriched	Planctomycetia
B19_NODE_119_length_72448_cov_151.285014	0	0.00139461	0	UG_enriched	Acidobacteriia
B19_NODE_11_length_122416_cov_33.183457	0.000115128	0.000225977	0	UG_enriched	Actinobacteria
B19_NODE_1200_length_42113_cov_28.585097	0	0.000212003	0	UG_enriched	Clostridia
B19_NODE_1201_length_42109_cov_34.543159	0	0.00020957	0	UG_enriched	Alphaproteobacteria
B19_NODE_1202_length_42105_cov_23.372461	0	0.00022144	0	UG_enriched	Oligoflexia
B19_NODE_1203_length_42096_cov_86.664066	0	0.000514869	0	UG_enriched	NAmissing
B19_NODE_1204_length_42064_cov_14.668333	0	8.44736e-05	0	UG_enriched	Verrucomicrobiae
B19_NODE_1205_length_42035_cov_319.921606	0	0.00271136	0	UG_enriched	Deltaproteobacteria
B19_NODE_1206_length_42035_cov_93.742449	0	0.00110624	0	UG_enriched	Deltaproteobacteria
B19_NODE_1207_length_42032_cov_21.249160	0	0.000337693	0	UG_enriched	Acidithiobacillia
B19_NODE_1209_length_42018_cov_9.974478	0	8.63686e-05	0	UG_enriched	Acidobacteriia
B19_NODE_120_length_72445_cov_12.201450	0	0.000101443	0.00054183	AG_enriched	NAmissing
B19_NODE_1210_length_42009_cov_11.408519	0	0.000114975	0	UG_enriched	Acidobacteriia
B19_NODE_1212_length_41985_cov_15.897854	0	9.23814e-05	0	UG_enriched	Actinobacteria
B19_NODE_1213_length_41957_cov_73.479929	0	0.000508653	0	UG_enriched	Actinobacteria
B19_NODE_1215_length_41945_cov_14.103629	0	0.000308529	0	UG_enriched	Betaproteobacteria
B19_NODE_1216_length_41927_cov_596.958755	0	0.00446686	0	UG_enriched	NAmissing
B19_NODE_121_length_72434_cov_51.462496	0	0.000298708	0	UG_enriched	Bacilli
B19_NODE_1220_length_41881_cov_19.940013	0	0.000157399	0	UG_enriched	Actinobacteria
B19_NODE_1221_length_41880_cov_11.898386	0	6.91867e-05	0	UG_enriched	Betaproteobacteria
B19_NODE_1222_length_41869_cov_10.956785	0	0.00012149	0	UG_enriched	Bacilli
B19_NODE_1223_length_41866_cov_14.398101	0	8.25661e-05	0	UG_enriched	Clostridia
B19_NODE_1224_length_41852_cov_23.011723	0	0.000197854	0	UG_enriched	Acidobacteriia
B19_NODE_1225_length_41823_cov_60.904281	0	0.000443284	0	UG_enriched	Deltaproteobacteria
B19_NODE_1226_length_41820_cov_40.328577	0	0.000242501	0	UG_enriched	Alphaproteobacteria
B19_NODE_1227_length_41815_cov_18.447773	0	0.000106697	0	UG_enriched	Bacilli
B19_NODE_1228_length_41802_cov_14.343881	0	8.28546e-05	0	UG_enriched	Clostridia
B19_NODE_1229_length_41797_cov_26.907216	0	0.000651644	0	UG_enriched	NAmissing
B19_NODE_122_length_72218_cov_24.510663	0	0.000145566	0	UG_enriched	Gammaproteobacteria
B19_NODE_1232_length_41759_cov_18.499257	0	0.00038703	0	UG_enriched	Betaproteobacteria
B19_NODE_1233_length_41758_cov_12.904323	0	7.47451e-05	0	UG_enriched	Actinobacteria
B19_NODE_1235_length_41727_cov_22.719308	0	0.000132465	0	UG_enriched	Thermoprotei
B19_NODE_1238_length_41688_cov_16.262940	0	0.000160232	0	UG_enriched	Acidobacteriia
B19_NODE_1240_length_41661_cov_12.676032	0	7.32922e-05	0	UG_enriched	Deltaproteobacteria
B19_NODE_1241_length_41655_cov_9.809303	0	5.86992e-05	0	UG_enriched	Clostridia
B19_NODE_1243_length_41646_cov_57.343344	0	0.000396752	0	UG_enriched	Vicinamibacteria
B19_NODE_1244_length_41640_cov_17.173957	0	0.000103971	0	UG_enriched	Sphingobacteriia
B19_NODE_1246_length_41602_cov_38.483597	0	0.00021412	0	UG_enriched	Cytophagia
B19_NODE_1247_length_41587_cov_14.283227	0	8.14087e-05	0	UG_enriched	Bacilli
B19_NODE_1248_length_41585_cov_11.676234	0	7.31002e-05	0	UG_enriched	Alphaproteobacteria
B19_NODE_1249_length_41579_cov_27.410630	0	0.000476829	0	UG_enriched	Betaproteobacteria
B19_NODE_124_length_72191_cov_16.838139	0	9.97559e-05	0	UG_enriched	Actinobacteria
B19_NODE_1250_length_41568_cov_78.822297	0	0.000457695	0	UG_enriched	Clostridia
B19_NODE_1251_length_41566_cov_79.033533	0	0.000469784	0	UG_enriched	Alphaproteobacteria
B19_NODE_1252_length_41554_cov_11.807056	0	6.9444e-05	0	UG_enriched	Anaerolineae
B19_NODE_1253_length_41546_cov_27.965655	0	0.00022411	0	UG_enriched	Deltaproteobacteria
B19_NODE_1254_length_41542_cov_13.215706	0	7.68877e-05	0	UG_enriched	Flavobacteriia
B19_NODE_1255_length_41522_cov_58.431910	0	0.000622131	0	UG_enriched	Gammaproteobacteria
B19_NODE_1258_length_41487_cov_23.990611	0	0.00013756	0	UG_enriched	Bacilli
B19_NODE_125_length_72167_cov_36.268249	0	0.000211764	0	UG_enriched	Deltaproteobacteria
B19_NODE_1260_length_41458_cov_61.839939	0	0.000775382	0	UG_enriched	Betaproteobacteria
B19_NODE_1261_length_41446_cov_39.703921	0	0.000245057	0	UG_enriched	Actinobacteria
B19_NODE_1263_length_41429_cov_41.959709	0	0.000253501	0	UG_enriched	Acidobacteriia
B19_NODE_1264_length_41427_cov_84.278933	0	0.00289167	0	UG_enriched	Actinobacteria
B19_NODE_1266_length_41388_cov_15.665642	0	0.000210888	0	UG_enriched	Betaproteobacteria
B19_NODE_1267_length_41369_cov_14.872392	0	8.79407e-05	0	UG_enriched	Gammaproteobacteria
B19_NODE_126_length_72056_cov_31.290385	0	0.000187446	0	UG_enriched	Gammaproteobacteria
B19_NODE_1270_length_41358_cov_18.191439	0	0.000112546	0	UG_enriched	Cytophagia
B19_NODE_1271_length_41352_cov_18.232196	0	0.000112317	0	UG_enriched	Cytophagia
B19_NODE_1273_length_41330_cov_28.895118	0	0.000225911	0	UG_enriched	Gammaproteobacteria
B19_NODE_1274_length_41326_cov_35.165370	0	0.000237609	0	UG_enriched	Deltaproteobacteria
B19_NODE_1275_length_41311_cov_16.779378	0	0.000418658	0	UG_enriched	Acidobacteriia
B19_NODE_1277_length_41304_cov_24.187035	0	0.000185125	0	UG_enriched	Betaproteobacteria
B19_NODE_1278_length_41302_cov_77.423400_fragment_1	0	0.00043233	0	UG_enriched	Bacilli
B19_NODE_1279_length_41298_cov_13.221541	0	7.81626e-05	0	UG_enriched	Vicinamibacteria
B19_NODE_127_length_72034_cov_33.605413	0	0.000362314	0	UG_enriched	Acidobacteriia
B19_NODE_1280_length_41274_cov_45.210413_fragment_1	0	0.000267021	0	UG_enriched	Clostridia
B19_NODE_1280_length_41274_cov_45.210413_fragment_2	0	0.000281477	0	UG_enriched	Cytophagia
B19_NODE_1281_length_41260_cov_97.108482	0	0.0011016	0	UG_enriched	Bacilli
B19_NODE_1282_length_41257_cov_29.965099	0	0.000216825	0	UG_enriched	Thermoleophilia
B19_NODE_1283_length_41254_cov_18.694095	0	0.000110571	0	UG_enriched	NAmissing
B19_NODE_1284_length_41251_cov_99.114938	0	0.000594055	0	UG_enriched	Deltaproteobacteria
B19_NODE_1285_length_41236_cov_36.305626	0	0.000300132	0	UG_enriched	Betaproteobacteria
B19_NODE_1286_length_41232_cov_26.244870	0	0.000285015	0	UG_enriched	Verrucomicrobiae
B19_NODE_1287_length_41213_cov_11.666480	0	6.48381e-05	0	UG_enriched	Sphingobacteriia
B19_NODE_1288_length_41207_cov_16.334054	0	0.000206711	0	UG_enriched	Deltaproteobacteria
B19_NODE_1289_length_41203_cov_13.646739	0	0.000149418	0	UG_enriched	Acidobacteriia
B19_NODE_128_length_71802_cov_19.619998	0	0.000155978	0	UG_enriched	Actinobacteria
B19_NODE_1290_length_41186_cov_27.013299	0	0.000186242	0	UG_enriched	Betaproteobacteria
B19_NODE_1291_length_41185_cov_33.957233_fragment_1	0	0.000226598	0	UG_enriched	Clostridia
B19_NODE_1291_length_41185_cov_33.957233_fragment_2	0	0.000192278	0	UG_enriched	Gammaproteobacteria
B19_NODE_1292_length_41177_cov_11.425101	0	0.000183815	0	UG_enriched	Acidobacteriia
B19_NODE_1294_length_41157_cov_22.641988	0	0.000132529	0	UG_enriched	Gammaproteobacteria
B19_NODE_1295_length_41148_cov_19.452534	0	0.00112673	0	UG_enriched	Deltaproteobacteria
B19_NODE_1296_length_41139_cov_20.887036_fragment_1	0	0.000122762	0	UG_enriched	Clostridia
B19_NODE_1297_length_41139_cov_15.782178	0	0.000344449	0	UG_enriched	Acidobacteriia
B19_NODE_1298_length_41126_cov_11.623798	0	6.97547e-05	0	UG_enriched	Vicinamibacteria
B19_NODE_1299_length_41118_cov_39.912159	0	0.000301152	0	UG_enriched	Gammaproteobacteria
B19_NODE_129_length_71779_cov_20.676454	0	0.00018806	0	UG_enriched	Actinobacteria
B19_NODE_12_length_121772_cov_57.558829	0	0.000315993	0	UG_enriched	Actinobacteria
B19_NODE_1300_length_41112_cov_19.633120	0	0.000115981	0	UG_enriched	Bacilli
B19_NODE_1302_length_41104_cov_12.085776	0	7.12761e-05	0	UG_enriched	Bacilli
B19_NODE_1303_length_41103_cov_26.164295	0	0.000159994	0	UG_enriched	Flavobacteriia
B19_NODE_1304_length_41094_cov_20.166037	0	0.000153811	0	UG_enriched	Alphaproteobacteria
B19_NODE_1305_length_41089_cov_21.061486	0	0.000131552	0	UG_enriched	Chitinophagia
B19_NODE_1306_length_41083_cov_71.911061	0	0.000837247	0	UG_enriched	Bacilli
B19_NODE_1307_length_41067_cov_79.624915	0	0.000473057	0	UG_enriched	Sphingobacteriia
B19_NODE_1309_length_41060_cov_17.174052	0	9.99099e-05	0	UG_enriched	Actinobacteria
B19_NODE_130_length_71659_cov_269.365440	0	0.0025591	0	UG_enriched	Acidobacteriia
B19_NODE_1310_length_41054_cov_18.562648_fragment_1	0	0.000105564	0	UG_enriched	Bacilli
B19_NODE_1311_length_41053_cov_19.327528	0	0.00017024	0	UG_enriched	Nitrospira
B19_NODE_1312_length_41044_cov_34.225475	0	0.000576713	0	UG_enriched	Betaproteobacteria
B19_NODE_1313_length_41027_cov_54.544982	0	0.000324091	0	UG_enriched	Vicinamibacteria
B19_NODE_1316_length_41006_cov_12.293937	0	0.000289674	0	UG_enriched	Betaproteobacteria
B19_NODE_1317_length_41000_cov_101.958456	0	0.000655093	0	UG_enriched	Bacilli
B19_NODE_1318_length_41000_cov_24.025229	0	0.000141674	0	UG_enriched	Bacilli
B19_NODE_1319_length_40997_cov_14.182991	0	0.000114638	0	UG_enriched	Alphaproteobacteria
B19_NODE_131_length_71639_cov_15.032409	0	8.75392e-05	0	UG_enriched	Verrucomicrobiae
B19_NODE_1320_length_40996_cov_110.744584	0	0.00204588	0	UG_enriched	NAmissing
B19_NODE_1321_length_40991_cov_16.657148	0	0.000270889	0	UG_enriched	Alphaproteobacteria
B19_NODE_1322_length_40976_cov_42.466631	0	0.000245015	0	UG_enriched	Gammaproteobacteria
B19_NODE_1323_length_40973_cov_14.039860	0	8.54408e-05	0	UG_enriched	Actinobacteria
B19_NODE_1324_length_40966_cov_47.791132	0	0.000477832	0.000108534	UG_enriched	Gammaproteobacteria
B19_NODE_1325_length_40963_cov_13.941430	0	8.20283e-05	0	UG_enriched	Cytophagia
B19_NODE_1326_length_40948_cov_30.299856	0	0.00017889	0	UG_enriched	Acidobacteriia
B19_NODE_1327_length_40948_cov_24.298755	0	0.000139909	0	UG_enriched	Clostridia
B19_NODE_1328_length_40946_cov_52.008926	0	0.000337255	0	UG_enriched	Actinobacteria
B19_NODE_1329_length_40938_cov_13.003204	0	0.000164452	0	UG_enriched	Deltaproteobacteria
B19_NODE_132_length_71580_cov_25.322503	0	0.000190152	0	UG_enriched	Acidobacteriia
B19_NODE_1330_length_40931_cov_18.004159	0	0.000108422	0	UG_enriched	Actinobacteria
B19_NODE_1331_length_40915_cov_16.356828	0	9.45903e-05	0	UG_enriched	Actinobacteria
B19_NODE_1332_length_40909_cov_79.182259	0	0.00208256	0	UG_enriched	Opitutae
B19_NODE_1333_length_40897_cov_18.098281	0	0.000322238	0	UG_enriched	Alphaproteobacteria
B19_NODE_1334_length_40894_cov_68.531502_fragment_1	0	0.000393664	0	UG_enriched	Bacilli
B19_NODE_1335_length_40894_cov_18.817209_fragment_1	0	0.000117623	0	UG_enriched	Bacilli
B19_NODE_1336_length_40884_cov_32.945627	0	0.000257971	0	UG_enriched	Alphaproteobacteria
B19_NODE_1337_length_40882_cov_30.110050	0	0.000183033	0	UG_enriched	Deltaproteobacteria
B19_NODE_133_length_71495_cov_11.959197	0	0.000108201	0	UG_enriched	Actinobacteria
B19_NODE_1341_length_40853_cov_84.721506	0	0.000576969	0	UG_enriched	Gammaproteobacteria
B19_NODE_1342_length_40847_cov_39.803319	0	0.00024193	0	UG_enriched	NAmissing
B19_NODE_1343_length_40846_cov_21.264078	0	0.000559328	0	UG_enriched	NAmissing
B19_NODE_1346_length_40829_cov_32.809732	0	0.00109308	0	UG_enriched	Betaproteobacteria
B19_NODE_1347_length_40825_cov_77.648614	0	0.000452619	0	UG_enriched	Gammaproteobacteria
B19_NODE_1348_length_40824_cov_12.005887	0	7.17649e-05	0	UG_enriched	Actinobacteria
B19_NODE_1349_length_40823_cov_24.093259	0	0.000186262	0	UG_enriched	Spirochaetia
B19_NODE_1350_length_40814_cov_137.574720	0	0.000857338	0	UG_enriched	Actinobacteria
B19_NODE_1351_length_40813_cov_26.178959	0	0.000148592	0	UG_enriched	Fimbriimonadia
B19_NODE_1354_length_40746_cov_12.666339	0	7.71838e-05	0	UG_enriched	Deltaproteobacteria
B19_NODE_1355_length_40711_cov_399.784558	0	0.00235009	0	UG_enriched	Flavobacteriia
B19_NODE_1356_length_40693_cov_35.206285	0	0.000236086	0	UG_enriched	Alphaproteobacteria
B19_NODE_1357_length_40690_cov_48.004897	0	0.000427962	0	UG_enriched	Betaproteobacteria
B19_NODE_1358_length_40690_cov_43.926000	0	0.000364475	0	UG_enriched	Betaproteobacteria
B19_NODE_135_length_71363_cov_58.715376	0	0.000348115	0	UG_enriched	Alphaproteobacteria
B19_NODE_1361_length_40669_cov_48.457133	0	0.000311466	0	UG_enriched	Alphaproteobacteria
B19_NODE_1362_length_40665_cov_217.576754	0	0.00791322	0	UG_enriched	Alphaproteobacteria
B19_NODE_1363_length_40660_cov_79.188474	0	0.000459915	0	UG_enriched	Clostridia
B19_NODE_1364_length_40647_cov_15.731252	0	0.00042126	0	UG_enriched	Betaproteobacteria
B19_NODE_1365_length_40631_cov_27.058384	0	0.000151969	0	UG_enriched	Acidobacteriia
B19_NODE_1366_length_40623_cov_93.633899	0	0.000556396	0	UG_enriched	Clostridia
B19_NODE_1367_length_40602_cov_10.051890_fragment_1	0	6.38208e-05	0	UG_enriched	Clostridia
B19_NODE_1368_length_40592_cov_11.184547	0	6.33672e-05	0	UG_enriched	Actinobacteria
B19_NODE_1369_length_40581_cov_32.337462	0	0.000357947	0	UG_enriched	Alphaproteobacteria
B19_NODE_136_length_71284_cov_19.200943	0	0.000114788	0	UG_enriched	Sphingobacteriia
B19_NODE_1370_length_40572_cov_19.956068	0	0.000118527	0	UG_enriched	Spirochaetia
B19_NODE_1371_length_40549_cov_21.794266	0	0.000133221	0	UG_enriched	Clostridia
B19_NODE_1372_length_40546_cov_13.571189	0	7.90689e-05	0	UG_enriched	Clostridia
B19_NODE_1374_length_40543_cov_18.019413	0	0.000151008	0	UG_enriched	Deltaproteobacteria
B19_NODE_1376_length_40523_cov_56.353761	0	0.000566605	0	UG_enriched	Actinobacteria
B19_NODE_1377_length_40517_cov_13.257303	0	7.96274e-05	0	UG_enriched	Gammaproteobacteria
B19_NODE_1379_length_40511_cov_27.304133	0	0.000344487	0	UG_enriched	Deltaproteobacteria
B19_NODE_137_length_71136_cov_101.558982	0	0.00152828	0	UG_enriched	Actinobacteria
B19_NODE_1380_length_40491_cov_47.255861	0	0.000276699	0	UG_enriched	Gammaproteobacteria
B19_NODE_1381_length_40484_cov_16.304855	0	0.000167789	0	UG_enriched	Actinobacteria
B19_NODE_1382_length_40483_cov_307.877412	0	0.00181878	0	UG_enriched	Ktedonobacteria
B19_NODE_1383_length_40481_cov_145.886459	0	0.00180764	0	UG_enriched	Planctomycetia
B19_NODE_1384_length_40473_cov_52.975283	0	0.000447421	0	UG_enriched	Betaproteobacteria
B19_NODE_1385_length_40472_cov_13.023703	0	8.10557e-05	0	UG_enriched	Alphaproteobacteria
B19_NODE_1386_length_40434_cov_17.590901	0	0.000110341	0	UG_enriched	Acidobacteriia
B19_NODE_1388_length_40409_cov_13.301482	0	0.000306613	0	UG_enriched	Deltaproteobacteria
B19_NODE_1389_length_40401_cov_15.922099	0	9.73036e-05	0	UG_enriched	Acidobacteriia
B19_NODE_138_length_70935_cov_72.256913	0	0.000421592	0	UG_enriched	Planctomycetia
B19_NODE_1390_length_40385_cov_22.829159	0	0.000552576	0	UG_enriched	Deltaproteobacteria
B19_NODE_1391_length_40367_cov_15.265777	0	0.000118234	0	UG_enriched	Betaproteobacteria
B19_NODE_1392_length_40338_cov_13.453020	0	8.1325e-05	0.00027922	UG_enriched	Gammaproteobacteria
B19_NODE_1393_length_40326_cov_14.244270	0	0.000405508	0	UG_enriched	Alphaproteobacteria
B19_NODE_1394_length_40321_cov_15.945140	0	9.01424e-05	0	UG_enriched	Bacilli
B19_NODE_1395_length_40291_cov_19.618302	0	0.000113803	0	UG_enriched	Cytophagia
B19_NODE_1396_length_40261_cov_17.460702	0	0.000190718	0	UG_enriched	Acidobacteriia
B19_NODE_1397_length_40214_cov_24.267935	0	0.000203955	0	UG_enriched	Gammaproteobacteria
B19_NODE_1398_length_40211_cov_49.246738	0	0.00087569	0	UG_enriched	Deltaproteobacteria
B19_NODE_1399_length_40207_cov_15.553048	0	9.3938e-05	0	UG_enriched	Betaproteobacteria
B19_NODE_139_length_70806_cov_26.889599	0	0.000478054	0	UG_enriched	Acidobacteriia
B19_NODE_13_length_117984_cov_24.438298	0	0.000144695	0	UG_enriched	Cytophagia
B19_NODE_1400_length_40203_cov_12.846543	0	7.54866e-05	0	UG_enriched	Cytophagia
B19_NODE_1401_length_40191_cov_12.023869	0	7.13353e-05	0	UG_enriched	Clostridia
B19_NODE_1402_length_40168_cov_7.457109	0	4.65717e-05	0	UG_enriched	Bacteroidia
B19_NODE_1404_length_40156_cov_16.452408	0	9.44793e-05	0	UG_enriched	Clostridia
B19_NODE_1405_length_40148_cov_14.647295	0	8.84205e-05	0	UG_enriched	Bacilli
B19_NODE_1406_length_40139_cov_21.709385	0	0.000263824	0	UG_enriched	Acidobacteriia
B19_NODE_1407_length_40134_cov_37.576262	0	0.000221445	0	UG_enriched	Bacilli
B19_NODE_1408_length_40122_cov_36.656600	0	0.000214627	0	UG_enriched	Gammaproteobacteria
B19_NODE_1409_length_40096_cov_11.612872	0	6.85883e-05	0	UG_enriched	Actinobacteria
B19_NODE_140_length_70699_cov_18.202891	0	0.000319572	0	UG_enriched	NAmissing
B19_NODE_1410_length_40066_cov_15.159231	0	8.94896e-05	0	UG_enriched	Bacilli
B19_NODE_1412_length_40058_cov_76.318551	0	0.000448891	0	UG_enriched	Gammaproteobacteria
B19_NODE_1413_length_40054_cov_21.189730	0	0.000131821	0	UG_enriched	Betaproteobacteria
B19_NODE_1414_length_40054_cov_21.176020	0	0.000123445	0	UG_enriched	NAmissing
B19_NODE_1415_length_40042_cov_13.343662	0	7.70597e-05	0	UG_enriched	Cytophagia
B19_NODE_1416_length_40035_cov_92.592196	0	0.00163574	0	UG_enriched	Planctomycetia
B19_NODE_1419_length_40003_cov_12.241063	0	0.000132463	0	UG_enriched	Betaproteobacteria
B19_NODE_141_length_70566_cov_54.153168	0	0.000320135	0	UG_enriched	Flavobacteriia
B19_NODE_1420_length_40001_cov_50.558804	0	0.000341825	0	UG_enriched	Deltaproteobacteria
B19_NODE_1421_length_40000_cov_42.878082	0	0.00117599	0	UG_enriched	Actinobacteria
B19_NODE_1422_length_39988_cov_21.759122	0	0.000131996	0	UG_enriched	Gammaproteobacteria
B19_NODE_1423_length_39988_cov_10.389828	0	6.53836e-05	0	UG_enriched	Deltaproteobacteria
B19_NODE_1424_length_39974_cov_64.283524	0	0.000374551	0	UG_enriched	Gammaproteobacteria
B19_NODE_1426_length_39966_cov_12.940317	0	7.52559e-05	0	UG_enriched	Alphaproteobacteria
B19_NODE_1428_length_39955_cov_18.842907	0	0.000111664	0	UG_enriched	Betaproteobacteria
B19_NODE_1429_length_39953_cov_112.550704	0	0.000662213	0	UG_enriched	Gammaproteobacteria
B19_NODE_142_length_70558_cov_14.800250	0	8.63588e-05	0	UG_enriched	Planctomycetia
B19_NODE_1430_length_39947_cov_12.063471	0	7.69884e-05	0	UG_enriched	Kiritimatiellae
B19_NODE_1431_length_39939_cov_20.338808	0	0.000118624	0	UG_enriched	Cytophagia
B19_NODE_1432_length_39929_cov_12.283543	0	7.37979e-05	0	UG_enriched	Bacilli
B19_NODE_1433_length_39928_cov_19.474055	0	0.000115431	0	UG_enriched	Bacilli
B19_NODE_1435_length_39925_cov_14.728618	0	8.87871e-05	0	UG_enriched	Spirochaetia
B19_NODE_1436_length_39898_cov_14.421078	0	8.2689e-05	0	UG_enriched	Bacilli
B19_NODE_1438_length_39892_cov_15.740518	0	0.000204696	0	UG_enriched	Betaproteobacteria
B19_NODE_1439_length_39889_cov_44.253301	0	0.000259592	0	UG_enriched	Sphingobacteriia
B19_NODE_143_length_70532_cov_76.263292	0	0.000479449	0	UG_enriched	Bacilli
B19_NODE_1440_length_39885_cov_63.909390	0	0.00238705	0	UG_enriched	Gammaproteobacteria
B19_NODE_1441_length_39869_cov_12.895615	0	7.72665e-05	0	UG_enriched	Deltaproteobacteria
B19_NODE_1442_length_39853_cov_81.039298	0	0.000480027	0	UG_enriched	Cytophagia
B19_NODE_1443_length_39827_cov_12.141104	0	7.11364e-05	0	UG_enriched	NAmissing
B19_NODE_1445_length_39818_cov_25.480145	0	0.000196551	0	UG_enriched	Deltaproteobacteria
B19_NODE_1447_length_39774_cov_34.038848	0	0.000205684	0	UG_enriched	Alphaproteobacteria
B19_NODE_1448_length_39768_cov_30.414902	0	0.000175292	0	UG_enriched	Actinobacteria
B19_NODE_1449_length_39765_cov_11.181642	0	6.30231e-05	0	UG_enriched	Gammaproteobacteria
B19_NODE_144_length_70492_cov_23.891761	0	0.000138626	0	UG_enriched	Thermoprotei
B19_NODE_1451_length_39739_cov_12.734528	0	0.000123008	0	UG_enriched	Acidobacteriia
B19_NODE_1453_length_39734_cov_65.535724	0	0.000951518	0	UG_enriched	Actinobacteria
B19_NODE_1455_length_39721_cov_23.633263	0	0.000386822	0	UG_enriched	Acidobacteriia
B19_NODE_1456_length_39712_cov_139.879567	0	0.00133841	0	UG_enriched	Gammaproteobacteria
B19_NODE_1457_length_39699_cov_26.867470	0	0.000260346	0	UG_enriched	Gammaproteobacteria
B19_NODE_1458_length_39692_cov_79.644272	0	0.000388653	0	UG_enriched	Gammaproteobacteria
B19_NODE_1459_length_39676_cov_12.877742	0	0.000774827	0	UG_enriched	NAmissing
B19_NODE_145_length_70399_cov_18.940905	0	9.55798e-05	0	UG_enriched	Negativicutes
B19_NODE_1460_length_39667_cov_19.748056	0	0.000118669	0	UG_enriched	Acidobacteriia
B19_NODE_1462_length_39643_cov_49.456950	0	0.000548862	0	UG_enriched	Acidithiobacillia
B19_NODE_1463_length_39639_cov_23.179517	0	0.000269437	0	UG_enriched	Acidithiobacillia
B19_NODE_1464_length_39627_cov_286.928384	0	0.00283042	0	UG_enriched	Gammaproteobacteria
B19_NODE_1465_length_39624_cov_11.106169	0	6.3504e-05	0	UG_enriched	Gammaproteobacteria
B19_NODE_1466_length_39622_cov_26.944423	0	0.000160115	0	UG_enriched	Flavobacteriia
B19_NODE_1468_length_39601_cov_118.305998	0	0.000751493	0	UG_enriched	NAmissing
B19_NODE_1469_length_39597_cov_18.662207	0	0.000112845	0	UG_enriched	Cytophagia
B19_NODE_146_length_70079_cov_58.221581	0	0.00093234	0	UG_enriched	Bacilli
B19_NODE_1470_length_39590_cov_45.275705_fragment_1	0	0.000929114	0	UG_enriched	Gammaproteobacteria
B19_NODE_1471_length_39588_cov_74.243822	0	0.00145517	0	UG_enriched	Acidobacteriia
B19_NODE_1472_length_39576_cov_25.718378	0	0.000155249	0	UG_enriched	Acidobacteriia
B19_NODE_1474_length_39540_cov_20.899962	0	0.000125006	0	UG_enriched	Oligoflexia
B19_NODE_1475_length_39535_cov_965.079616	0.000246807	0.00814005	0	UG_enriched	Gammaproteobacteria
B19_NODE_1476_length_39520_cov_14.007374	0	8.22794e-05	0	UG_enriched	Bacilli
B19_NODE_1478_length_39518_cov_128.188759	0	0.000755345	0	UG_enriched	Clostridia
B19_NODE_1479_length_39506_cov_17.217079	0	0.000103969	0	UG_enriched	Bacilli
B19_NODE_147_length_69976_cov_14.478740	0	8.99101e-05	0	UG_enriched	Holophagae
B19_NODE_1480_length_39495_cov_16.568966	0	0.000141494	0	UG_enriched	Actinobacteria
B19_NODE_1481_length_39482_cov_14.191163	0	8.7337e-05	0	UG_enriched	Deltaproteobacteria
B19_NODE_1483_length_39475_cov_368.322907	0	0.00255236	0	UG_enriched	Actinobacteria
B19_NODE_1486_length_39464_cov_207.412621	0	0.00120189	0	UG_enriched	Flavobacteriia
B19_NODE_1487_length_39461_cov_21.804497	0	0.000126974	0	UG_enriched	Clostridia
B19_NODE_1488_length_39450_cov_55.878893	0	0.000333782	0	UG_enriched	Clostridia
B19_NODE_1489_length_39440_cov_16.764530	0	0.000100276	0	UG_enriched	Verrucomicrobiae
B19_NODE_148_length_69944_cov_10.217302	0	5.96445e-05	0	UG_enriched	NAmissing
B19_NODE_1491_length_39402_cov_33.681068	0	0.000417996	0	UG_enriched	Betaproteobacteria
B19_NODE_1492_length_39389_cov_27.366553	0	0.000160718	0	UG_enriched	Bacilli
B19_NODE_1493_length_39385_cov_97.875973	0	0.000667037	0	UG_enriched	Bacilli
B19_NODE_1495_length_39377_cov_23.329968	0	0.000136669	0	UG_enriched	Gammaproteobacteria
B19_NODE_1496_length_39371_cov_11.516965	0	7.03678e-05	0	UG_enriched	Alphaproteobacteria
B19_NODE_1497_length_39362_cov_20.640446	0	0.000117221	0	UG_enriched	Acidobacteriia
B19_NODE_1498_length_39360_cov_16.200534	0	9.29459e-05	0	UG_enriched	Cytophagia
B19_NODE_1499_length_39357_cov_11.496056	0	6.87138e-05	0	UG_enriched	Negativicutes
B19_NODE_149_length_69879_cov_29.545858	0	0.00017362	0	UG_enriched	Actinobacteria
B19_NODE_14_length_116150_cov_21.350075	0	0.000125447	0	UG_enriched	Spirochaetia
B19_NODE_1501_length_39314_cov_23.263965	0	0.000140724	0	UG_enriched	Acidobacteriia
B19_NODE_1502_length_39299_cov_56.016920	0	0.000317084	0	UG_enriched	Oligoflexia
B19_NODE_1503_length_39295_cov_24.254281	0	0.00014476	0	UG_enriched	Chitinophagia
B19_NODE_1504_length_39288_cov_20.474983	0	0.000119856	0	UG_enriched	Bacilli
B19_NODE_1505_length_39286_cov_15.696592	0	0.000116953	0	UG_enriched	Alphaproteobacteria
B19_NODE_1508_length_39278_cov_20.618719	0	0.000120318	0	UG_enriched	Cytophagia
B19_NODE_150_length_69808_cov_14.863848	0	0.00013331	0	UG_enriched	Betaproteobacteria
B19_NODE_1510_length_39235_cov_38.520980	0	0.00022626	0	UG_enriched	Acidimicrobiia
B19_NODE_1512_length_39233_cov_14.388662	0	9.00076e-05	0	UG_enriched	Acidobacteriia
B19_NODE_1513_length_39231_cov_104.637227	0	0.000761004	0	UG_enriched	Acidobacteriia
B19_NODE_1514_length_39225_cov_28.359867	0	0.000165364	0	UG_enriched	Clostridia
B19_NODE_1515_length_39216_cov_17.600112	0	0.000194571	0	UG_enriched	Betaproteobacteria
B19_NODE_1516_length_39213_cov_17.567623	0	0.00130326	0	UG_enriched	Alphaproteobacteria
B19_NODE_1517_length_39208_cov_197.128547	0	0.00226707	0	UG_enriched	Bacteroidia
B19_NODE_1518_length_39199_cov_3125.292765	0	0.0185272	0	UG_enriched	Thermoleophilia
B19_NODE_1519_length_39199_cov_16.168225	0	9.79098e-05	0	UG_enriched	Acidobacteriia
B19_NODE_151_length_69665_cov_23.821089	0	0.000140393	0	UG_enriched	Deltaproteobacteria
B19_NODE_1520_length_39184_cov_12.902093	0.00031054	7.54605e-05	0	UG_enriched	Acidobacteriia
B19_NODE_1521_length_39182_cov_16.779462	0	9.88604e-05	0	UG_enriched	Clostridia
B19_NODE_1522_length_39179_cov_25.846463	0	0.000149643	0	UG_enriched	Alphaproteobacteria
B19_NODE_1523_length_39177_cov_10.433465	0	6.04224e-05	0	UG_enriched	Bacilli
B19_NODE_1524_length_39176_cov_54.941566	0	0.000962456	0	UG_enriched	Betaproteobacteria
B19_NODE_1525_length_39174_cov_30.038626	0	0.000244866	0	UG_enriched	Betaproteobacteria
B19_NODE_1526_length_39170_cov_21.732200_fragment_2	0	0.00013138	0	UG_enriched	Deltaproteobacteria
B19_NODE_1527_length_39164_cov_54.481117	0	0.00101006	0	UG_enriched	Alphaproteobacteria
B19_NODE_1528_length_39151_cov_50.181502	0	0.000404567	0	UG_enriched	Bacilli
B19_NODE_1529_length_39133_cov_15.502610	0	0.000172204	0	UG_enriched	Deltaproteobacteria
B19_NODE_152_length_69605_cov_48.043983	0	0.000729209	0	UG_enriched	Gammaproteobacteria
B19_NODE_1530_length_39129_cov_51.132262	0	0.00030153	0	UG_enriched	Betaproteobacteria
B19_NODE_1531_length_39107_cov_31.498796	0	0.000244779	0	UG_enriched	Alphaproteobacteria
B19_NODE_1532_length_39096_cov_68.313004	0	0.00141107	0	UG_enriched	Acidobacteriia
B19_NODE_1533_length_39088_cov_122.135885	0	0.00127923	0	UG_enriched	Alphaproteobacteria
B19_NODE_1534_length_39060_cov_18.449224	0	0.00032522	0	UG_enriched	Acidobacteriia
B19_NODE_1535_length_39034_cov_10.518946	0	6.1512e-05	0	UG_enriched	Gammaproteobacteria
B19_NODE_1537_length_38999_cov_13.606332	0	7.69916e-05	0	UG_enriched	Acidobacteriia
B19_NODE_1538_length_38998_cov_45.146625_fragment_1	0	0.000279769	0	UG_enriched	Vicinamibacteria
B19_NODE_1539_length_38978_cov_18.006346	0	0.000103203	0	UG_enriched	Bacilli
B19_NODE_153_length_69351_cov_31.569124	0	0.000277569	0	UG_enriched	Alphaproteobacteria
B19_NODE_1540_length_38972_cov_15.050415	0	8.73494e-05	0	UG_enriched	Deltaproteobacteria
B19_NODE_1541_length_38954_cov_23.412324	0	0.000136892	0	UG_enriched	Clostridia
B19_NODE_1542_length_38939_cov_20.557299	0	0.00011845	0	UG_enriched	Alphaproteobacteria
B19_NODE_1543_length_38918_cov_17.808327	0	0.000148268	0.000179578	AG_enriched	NAmissing
B19_NODE_1545_length_38895_cov_18.731153	0	0.000110351	0	UG_enriched	Flavobacteriia
B19_NODE_1546_length_38891_cov_28.899088	0	0.000121951	0	UG_enriched	Sphingobacteriia
B19_NODE_1547_length_38877_cov_20.240894	0	0.000116155	0	UG_enriched	Cytophagia
B19_NODE_1548_length_38876_cov_50.140285	0	0.000319965	0	UG_enriched	Actinobacteria
B19_NODE_1549_length_38873_cov_30.935674	0	0.000203036	0	UG_enriched	Planctomycetia
B19_NODE_1550_length_38872_cov_11.909756	0	0.000142163	0	UG_enriched	Alphaproteobacteria
B19_NODE_1551_length_38871_cov_20.149474	0	0.000126548	0	UG_enriched	Deltaproteobacteria
B19_NODE_1553_length_38860_cov_19.916325	0	0.000115159	0	UG_enriched	Sphingobacteriia
B19_NODE_1554_length_38858_cov_28.706569	0	0.000169455	0	UG_enriched	Deltaproteobacteria
B19_NODE_1555_length_38855_cov_19.539742	0	0.000115392	0	UG_enriched	Acidobacteriia
B19_NODE_1556_length_38854_cov_70.206474	0	0.000417446	0	UG_enriched	Bacilli
B19_NODE_1557_length_38850_cov_59.742106	0	0.000374353	0	UG_enriched	Bacilli
B19_NODE_1559_length_38837_cov_27.415373	0	0.000510776	0	UG_enriched	NAmissing
B19_NODE_155_length_69068_cov_22.340689	0	0.000440777	0	UG_enriched	Actinobacteria
B19_NODE_1561_length_38810_cov_124.453000	0	0.000935177	0	UG_enriched	Betaproteobacteria
B19_NODE_1562_length_38805_cov_11.392903	0	6.57613e-05	0	UG_enriched	Bacilli
B19_NODE_1563_length_38782_cov_18.842410	0	0.000254698	0	UG_enriched	Actinobacteria
B19_NODE_1564_length_38779_cov_12.542764	0	7.44134e-05	0	UG_enriched	Gammaproteobacteria
B19_NODE_1565_length_38751_cov_25.681052	0	0.000156499	0	UG_enriched	Deltaproteobacteria
B19_NODE_1566_length_38725_cov_235.957538	0	0.00172874	0	UG_enriched	Betaproteobacteria
B19_NODE_1567_length_38715_cov_70.683006_fragment_1	0	0.000424236	0	UG_enriched	Bacteroidia
B19_NODE_1568_length_38713_cov_19.687749	0	0.000115553	0	UG_enriched	Actinobacteria
B19_NODE_1569_length_38711_cov_134.329677	0	0.000797661	0	UG_enriched	Acidobacteriia
B19_NODE_156_length_68910_cov_23.030789	0	0.000140677	0	UG_enriched	Acidobacteriia
B19_NODE_1570_length_38681_cov_21.850386	0	0.000126775	0	UG_enriched	Gammaproteobacteria
B19_NODE_1571_length_38677_cov_30.893325	0	0.000837347	0	UG_enriched	NAmissing
B19_NODE_1572_length_38677_cov_9.866889	0	5.89692e-05	0	UG_enriched	Cytophagia
B19_NODE_1573_length_38651_cov_28.915017_fragment_2	0	0.000229178	0	UG_enriched	Planctomycetia
B19_NODE_1575_length_38647_cov_12.478648	0	7.54567e-05	0	UG_enriched	Bacilli
B19_NODE_1576_length_38635_cov_109.904899	0	0.000927417	0	UG_enriched	Clostridia
B19_NODE_1577_length_38578_cov_16.419568	0	9.28096e-05	0	UG_enriched	Actinobacteria
B19_NODE_1578_length_38575_cov_16.076947	0	9.66823e-05	0	UG_enriched	Betaproteobacteria
B19_NODE_1579_length_38557_cov_15.987325	0	9.88369e-05	0	UG_enriched	Betaproteobacteria
B19_NODE_157_length_68841_cov_22.727415	0	0.000137593	0	UG_enriched	Thermoprotei
B19_NODE_1581_length_38533_cov_11.749493	0	6.8688e-05	0	UG_enriched	Bacilli
B19_NODE_1582_length_38529_cov_12.054088	0	0.000323455	0	UG_enriched	NAmissing
B19_NODE_1583_length_38523_cov_43.064859	0	0.000381017	0	UG_enriched	Cytophagia
B19_NODE_1584_length_38514_cov_40.932630	0	0.000254825	7.09908e-05	AG_enriched	Bacilli
B19_NODE_1585_length_38511_cov_115.994643	0	0.00117905	0	UG_enriched	Actinobacteria
B19_NODE_1586_length_38505_cov_38.396047	0	0.000225181	0	UG_enriched	Betaproteobacteria
B19_NODE_1587_length_38502_cov_117.140869	0	0.00091835	0	UG_enriched	Acidobacteriia
B19_NODE_1588_length_38498_cov_23.403402	0	0.000189965	0	UG_enriched	Betaproteobacteria
B19_NODE_1589_length_38479_cov_35.121929	0	0.000215293	0	UG_enriched	Acidobacteriia
B19_NODE_1590_length_38473_cov_13.940913	0	0.000117356	0	UG_enriched	Betaproteobacteria
B19_NODE_1593_length_38417_cov_15.267635	0	9.26251e-05	0	UG_enriched	Alphaproteobacteria
B19_NODE_1594_length_38413_cov_38.681709	0	0.000265746	0	UG_enriched	Actinobacteria
B19_NODE_1595_length_38411_cov_13.009386	0	7.83025e-05	0	UG_enriched	Betaproteobacteria
B19_NODE_1596_length_38387_cov_22.303611	0	0.00013216	0	UG_enriched	Oligoflexia
B19_NODE_1597_length_38380_cov_22.968167	0	0.00013863	0	UG_enriched	Alphaproteobacteria
B19_NODE_1598_length_38352_cov_49.139750	0	0.000299907	0	UG_enriched	Acidobacteriia
B19_NODE_1599_length_38348_cov_59.073408	0	0.000560649	0	UG_enriched	Verrucomicrobiae
B19_NODE_159_length_68167_cov_65.455177_fragment_1	0	0.000456057	0	UG_enriched	NAmissing
B19_NODE_159_length_68167_cov_65.455177_fragment_2	0	0.00037016	0	UG_enriched	Gammaproteobacteria
B19_NODE_1600_length_38348_cov_12.681430	0	7.23776e-05	0	UG_enriched	Planctomycetia
B19_NODE_1601_length_38332_cov_47.711968	0	0.000609848	0	UG_enriched	Deltaproteobacteria
B19_NODE_1602_length_38331_cov_9.474396	0	5.45062e-05	0	UG_enriched	Verrucomicrobiae
B19_NODE_1603_length_38319_cov_85.979589	0	0.000501632	0	UG_enriched	Gammaproteobacteria
B19_NODE_1604_length_38312_cov_14.041326	0	0.000357133	0	UG_enriched	Gammaproteobacteria
B19_NODE_1605_length_38309_cov_18.276154	0	0.000109606	0	UG_enriched	Alphaproteobacteria
B19_NODE_1606_length_38305_cov_24.140758	0	0.000142617	0	UG_enriched	Actinobacteria
B19_NODE_1607_length_38302_cov_12.868905	0	7.78617e-05	0	UG_enriched	NAmissing
B19_NODE_1608_length_38300_cov_25.323729	0	0.000150246	0	UG_enriched	Bacilli
B19_NODE_1609_length_38297_cov_16.766853	0	0.000103136	0	UG_enriched	Clostridia
B19_NODE_160_length_68058_cov_55.191786	0	0.000328446	0	UG_enriched	NAmissing
B19_NODE_1611_length_38283_cov_11.525165	0	0.00011318	0	UG_enriched	Actinobacteria
B19_NODE_1612_length_38273_cov_29.212596	0	0.000173241	0	UG_enriched	Deltaproteobacteria
B19_NODE_1613_length_38266_cov_12.554605	0	7.49239e-05	0	UG_enriched	Clostridia
B19_NODE_1614_length_38258_cov_370.939900	0	0.00391762	0	UG_enriched	Betaproteobacteria
B19_NODE_1615_length_38258_cov_25.757584	0	0.000151252	0	UG_enriched	Bacilli
B19_NODE_1616_length_38257_cov_11.402021	0	0.000157315	0	UG_enriched	Actinobacteria
B19_NODE_1617_length_38245_cov_9.899712	0	5.86162e-05	0	UG_enriched	Acidobacteriia
B19_NODE_1618_length_38242_cov_15.402310	0.000980727	8.97258e-05	0	UG_enriched	Deltaproteobacteria
B19_NODE_1619_length_38235_cov_24.229806	0	0.000138624	0	UG_enriched	Clostridia
B19_NODE_161_length_67902_cov_69.491739	0	0.000416667	0	UG_enriched	Deltaproteobacteria
B19_NODE_1621_length_38217_cov_17.966406	0	0.000111643	0	UG_enriched	Gammaproteobacteria
B19_NODE_1623_length_38205_cov_10.760052	0	6.16936e-05	0	UG_enriched	Betaproteobacteria
B19_NODE_1624_length_38192_cov_25.287175	0	0.000249116	0	UG_enriched	Alphaproteobacteria
B19_NODE_1625_length_38191_cov_153.079531	0	0.000899787	0	UG_enriched	NAmissing
B19_NODE_1626_length_38155_cov_43.045906	0	0.000339842	0	UG_enriched	Alphaproteobacteria
B19_NODE_1627_length_38154_cov_24.710859	0	0.000151487	0	UG_enriched	Acidobacteriia
B19_NODE_1628_length_38137_cov_71.713697	0	0.000434758	0	UG_enriched	Betaproteobacteria
B19_NODE_162_length_67838_cov_19.139829	0	0.000214403	0	UG_enriched	Deltaproteobacteria
B19_NODE_1631_length_38115_cov_14.137467	0	7.93107e-05	0	UG_enriched	Sphingobacteriia
B19_NODE_1632_length_38066_cov_16.484623	0	9.79751e-05	0	UG_enriched	Alphaproteobacteria
B19_NODE_1633_length_38058_cov_17.399626	0	0.000105208	0	UG_enriched	Alphaproteobacteria
B19_NODE_1634_length_38057_cov_31.761460	0	0.000182862	0	UG_enriched	Cytophagia
B19_NODE_1635_length_38053_cov_17.099716	0	0.000136821	0	UG_enriched	Betaproteobacteria
B19_NODE_1636_length_38046_cov_243.469269	0	0.0016889	0	UG_enriched	Caldilineae
B19_NODE_1638_length_38043_cov_10.320364	0	6.35597e-05	0	UG_enriched	Acidobacteriia
B19_NODE_163_length_67802_cov_58.616322	0	0.000344481	0	UG_enriched	Deltaproteobacteria
B19_NODE_1640_length_38006_cov_22.137124	0	0.000279809	0	UG_enriched	NAmissing
B19_NODE_1641_length_37954_cov_68.645030	0	0.000404843	0	UG_enriched	Gammaproteobacteria
B19_NODE_1642_length_37953_cov_13.533748	0	7.85331e-05	0	UG_enriched	Planctomycetia
B19_NODE_1643_length_37951_cov_17.166297	0	0.000267843	0	UG_enriched	Alphaproteobacteria
B19_NODE_1645_length_37937_cov_16.733515	0	9.91569e-05	0	UG_enriched	Acidobacteriia
B19_NODE_1646_length_37923_cov_22.297481	0	0.000130471	0	UG_enriched	Gammaproteobacteria
B19_NODE_1647_length_37917_cov_101.028287	0	0.00131036	0	UG_enriched	Actinobacteria
B19_NODE_1648_length_37906_cov_19.925180	0	0.000231731	0	UG_enriched	Betaproteobacteria
B19_NODE_1649_length_37903_cov_42.788073	0	0.000244002	0	UG_enriched	Clostridia
B19_NODE_164_length_67756_cov_41.258312	0	0.000304742	0	UG_enriched	Deltaproteobacteria
B19_NODE_1650_length_37874_cov_11.093551_fragment_2	0	0.000158586	0	UG_enriched	Betaproteobacteria
B19_NODE_1651_length_37869_cov_10.885783	0	6.58206e-05	0	UG_enriched	Clostridia
B19_NODE_1652_length_37864_cov_61.627285	0	0.000371213	0	UG_enriched	Betaproteobacteria
B19_NODE_1653_length_37839_cov_60.641065	0	0.00043273	0	UG_enriched	Actinobacteria
B19_NODE_1654_length_37833_cov_13.073005	0	0.000248079	0	UG_enriched	Deltaproteobacteria
B19_NODE_1655_length_37825_cov_40.657162	0	0.000231917	0	UG_enriched	Flavobacteriia
B19_NODE_1656_length_37816_cov_47.547761	0	0.000358959	0	UG_enriched	Bacilli
B19_NODE_1657_length_37816_cov_19.591616	0	0.000110363	0	UG_enriched	Clostridia
B19_NODE_1658_length_37812_cov_70.401303	0	0.000218911	0	UG_enriched	Opitutae
B19_NODE_1659_length_37799_cov_31.906634	0	0.000186889	0	UG_enriched	Gammaproteobacteria
B19_NODE_165_length_67699_cov_25.713323	0	0.000194822	0	UG_enriched	Thermoleophilia
B19_NODE_1661_length_37796_cov_11.905434	0	9.90647e-05	0	UG_enriched	NAmissing
B19_NODE_1662_length_37784_cov_11.000610	0	6.72243e-05	0	UG_enriched	Vicinamibacteria
B19_NODE_1663_length_37740_cov_18.925169	0	0.000392337	0	UG_enriched	Acidimicrobiia
B19_NODE_1664_length_37738_cov_11.247592	0	7.17964e-05	0	UG_enriched	Deltaproteobacteria
B19_NODE_1665_length_37736_cov_120.831188	0	0.0011964	0	UG_enriched	Verrucomicrobiae
B19_NODE_1666_length_37727_cov_52.789499	0	0.000308109	0	UG_enriched	Bacteroidia
B19_NODE_1667_length_37727_cov_43.651970	0	0.000249676	0	UG_enriched	Bacilli
B19_NODE_1668_length_37726_cov_16.047782	0	0.000142715	0	UG_enriched	Gammaproteobacteria
B19_NODE_1669_length_37723_cov_396.731125	0	0.0023603	0	UG_enriched	Flavobacteriia
B19_NODE_166_length_67531_cov_17.344611	0	0.000216142	0	UG_enriched	Acidobacteriia
B19_NODE_1670_length_37721_cov_12.645675	0	7.4524e-05	0	UG_enriched	Actinobacteria
B19_NODE_1671_length_37713_cov_50.847151	0	0.00171196	0	UG_enriched	Actinobacteria
B19_NODE_1673_length_37704_cov_12.479907	0	0.000119969	0	UG_enriched	Alphaproteobacteria
B19_NODE_1674_length_37668_cov_27.241220	0	0.00044487	0	UG_enriched	NAmissing
B19_NODE_1675_length_37666_cov_55.400654	0	0.000304694	0	UG_enriched	Acidobacteriia
B19_NODE_1676_length_37664_cov_10.312797	0	6.23098e-05	0	UG_enriched	Betaproteobacteria
B19_NODE_1677_length_37658_cov_12.614366_fragment_1	0	7.32122e-05	0	UG_enriched	Alphaproteobacteria
B19_NODE_1678_length_37624_cov_11.584737	0	0.000229824	0	UG_enriched	Alphaproteobacteria
B19_NODE_1679_length_37614_cov_17.685428	0	0.000100954	0	UG_enriched	Gammaproteobacteria
B19_NODE_167_length_67455_cov_34.694644	0	0.000200532	0	UG_enriched	Cytophagia
B19_NODE_1681_length_37558_cov_12.272058	0	7.29074e-05	0	UG_enriched	Betaproteobacteria
B19_NODE_1682_length_37546_cov_25.186471_fragment_1	0	0.000168933	0	UG_enriched	Alphaproteobacteria
B19_NODE_1683_length_37545_cov_20.924700	0	0.000123119	0	UG_enriched	Clostridia
B19_NODE_1684_length_37508_cov_14.479187	0	8.73254e-05	0	UG_enriched	Gammaproteobacteria
B19_NODE_1685_length_37498_cov_16.207916	0	9.7968e-05	0	UG_enriched	Actinobacteria
B19_NODE_1686_length_37480_cov_35.016112	0	0.000211085	0	UG_enriched	Clostridia
B19_NODE_1687_length_37468_cov_18.306979	0	0.000152551	0	UG_enriched	Actinobacteria
B19_NODE_1688_length_37458_cov_18.037644_fragment_1	0	0.000371199	0	UG_enriched	Alphaproteobacteria
B19_NODE_1689_length_37456_cov_17.682442	0	0.00010794	0	UG_enriched	Deltaproteobacteria
B19_NODE_168_length_67380_cov_33.098017	0	0.000196606	0	UG_enriched	Deltaproteobacteria
B19_NODE_1691_length_37441_cov_57.249478	0	0.000340921	0	UG_enriched	Gammaproteobacteria
B19_NODE_1693_length_37395_cov_11.572309	0	6.52049e-05	0	UG_enriched	Clostridia
B19_NODE_1694_length_37385_cov_32.160621	0	0.000811742	0	UG_enriched	Fimbriimonadia
B19_NODE_1695_length_37365_cov_253.018494	0	0.00142455	0	UG_enriched	Gammaproteobacteria
B19_NODE_1696_length_37357_cov_17.077422	0	0.000106276	0	UG_enriched	Clostridia
B19_NODE_1699_length_37289_cov_27.420959	0	0.000721964	0	UG_enriched	Betaproteobacteria
B19_NODE_169_length_67218_cov_24.545628	0	0.000146058	0	UG_enriched	Betaproteobacteria
B19_NODE_16_length_109940_cov_30.262911	0	0.000188235	0.000710549	AG_enriched	Alphaproteobacteria
B19_NODE_1700_length_37286_cov_13.719427	0	8.78454e-05	0	UG_enriched	Clostridia
B19_NODE_1701_length_37280_cov_60.272048	0	0.000359847	0	UG_enriched	Verrucomicrobiae
B19_NODE_1702_length_37278_cov_26.700642	0	0.000220366	0	UG_enriched	Actinobacteria
B19_NODE_1703_length_37277_cov_28.870641	0	0.00016846	0	UG_enriched	Oligoflexia
B19_NODE_1704_length_37266_cov_20.282363	0	0.000120903	0	UG_enriched	Bacilli
B19_NODE_1705_length_37266_cov_17.388138	0	0.000132784	0	UG_enriched	Alphaproteobacteria
B19_NODE_1706_length_37263_cov_21.616131	0	0.000127598	0	UG_enriched	Sphingobacteriia
B19_NODE_1707_length_37244_cov_33.251768	0	0.000199638	0	UG_enriched	Bacilli
B19_NODE_1708_length_37218_cov_14.748163	0	8.95083e-05	0	UG_enriched	Bacilli
B19_NODE_1709_length_37214_cov_43.063457	0	0.000256761	0	UG_enriched	Acidobacteriia
B19_NODE_170_length_67125_cov_14.283286	0	8.12586e-05	0	UG_enriched	Acidobacteriia
B19_NODE_1711_length_37191_cov_57.864848	0	0.0010946	0	UG_enriched	Betaproteobacteria
B19_NODE_1712_length_37150_cov_135.784769	0	0.0023599	0	UG_enriched	NAmissing
B19_NODE_1715_length_37102_cov_10.682187	0	0.0001714	0	UG_enriched	Betaproteobacteria
B19_NODE_1717_length_37081_cov_87.777508	0	0.000522766	0	UG_enriched	Acidobacteriia
B19_NODE_1718_length_37079_cov_14.559286	0	0.000618855	0	UG_enriched	Acidobacteriia
B19_NODE_1719_length_37071_cov_34.658499	0	0.000282898	0	UG_enriched	Actinobacteria
B19_NODE_171_length_67058_cov_14.826008	0	0.000256116	0	UG_enriched	Betaproteobacteria
B19_NODE_1720_length_37057_cov_12.875601	0	0.000204501	0.000172246	UG_enriched	Actinobacteria
B19_NODE_1721_length_37028_cov_14.923187	0	9.19811e-05	0	UG_enriched	Gammaproteobacteria
B19_NODE_1722_length_37019_cov_30.001596	0	0.000179659	0	UG_enriched	Cytophagia
B19_NODE_1723_length_37012_cov_15.064967	0	0.000144103	0	UG_enriched	Actinobacteria
B19_NODE_1724_length_36996_cov_134.189654	0	0.000827905	0	UG_enriched	Alphaproteobacteria
B19_NODE_1725_length_36977_cov_13.273983	0	0.000160737	0	UG_enriched	Nitriliruptoria
B19_NODE_1726_length_36973_cov_51.649521	0	0.000304356	0	UG_enriched	Bacilli
B19_NODE_1727_length_36971_cov_12.263680_fragment_1	0	6.97935e-05	0	UG_enriched	Betaproteobacteria
B19_NODE_1728_length_36926_cov_14.331751	0	0.000150643	0	UG_enriched	Bacilli
B19_NODE_1729_length_36920_cov_33.738315	0	0.000228367	0	UG_enriched	Alphaproteobacteria
B19_NODE_172_length_66996_cov_105.270044	0	0.000721101	0	UG_enriched	Acidobacteriia
B19_NODE_1730_length_36920_cov_18.291333	0	0.000407234	0	UG_enriched	Cytophagia
B19_NODE_1731_length_36907_cov_12.639178	0	7.84173e-05	0	UG_enriched	Gammaproteobacteria
B19_NODE_1732_length_36894_cov_186.058796	0	0.00108151	0	UG_enriched	Gammaproteobacteria
B19_NODE_1733_length_36867_cov_11.528415	0	6.71039e-05	0	UG_enriched	Actinobacteria
B19_NODE_1734_length_36862_cov_23.823566	0	0.000139834	0	UG_enriched	Betaproteobacteria
B19_NODE_1735_length_36860_cov_13.321587	0	7.5851e-05	0	UG_enriched	Bacilli
B19_NODE_1737_length_36843_cov_31.334702	0	0.000188243	0	UG_enriched	Deltaproteobacteria
B19_NODE_1738_length_36838_cov_13.192344	0	0.000162344	0	UG_enriched	Alphaproteobacteria
B19_NODE_1739_length_36826_cov_73.251720	0	0.00109463	0	UG_enriched	Vicinamibacteria
B19_NODE_1740_length_36814_cov_17.100356	0	0.00013665	0	UG_enriched	Betaproteobacteria
B19_NODE_1741_length_36803_cov_35.835909	0	0.00112744	0	UG_enriched	Betaproteobacteria
B19_NODE_1742_length_36795_cov_36.556941	0	0.00027537	0	UG_enriched	Oligoflexia
B19_NODE_1743_length_36795_cov_27.413963	0	0.000163483	0	UG_enriched	Gammaproteobacteria
B19_NODE_1744_length_36783_cov_16.643024	0	9.66937e-05	0	UG_enriched	Bacilli
B19_NODE_1745_length_36772_cov_50.631315	0	0.000307678	0	UG_enriched	Vicinamibacteria
B19_NODE_1747_length_36738_cov_18.095494	0	0.000108712	0	UG_enriched	Betaproteobacteria
B19_NODE_1748_length_36733_cov_17.294373	0	0.000102592	0	UG_enriched	Acidobacteriia
B19_NODE_1749_length_36727_cov_27.111338	0	0.000154051	0	UG_enriched	Oligoflexia
B19_NODE_174_length_66713_cov_25.178208	0	0.000145894	0	UG_enriched	Alphaproteobacteria
B19_NODE_1750_length_36722_cov_37.693321	0	0.000227854	0	UG_enriched	Planctomycetia
B19_NODE_1752_length_36687_cov_26.533959	0	0.000157544	0	UG_enriched	Cytophagia
B19_NODE_1754_length_36646_cov_17.243666	0	0.000156381	0	UG_enriched	Acidithiobacillia
B19_NODE_1755_length_36628_cov_11.754764	0.000131836	6.99936e-05	0	UG_enriched	Alphaproteobacteria
B19_NODE_1756_length_36602_cov_279.532739	0	0.0020611	0	UG_enriched	Acidobacteriia
B19_NODE_1757_length_36583_cov_17.108410	0	0.000112461	0	UG_enriched	Spirochaetia
B19_NODE_175_length_66674_cov_18.728876	0	0.000111746	0	UG_enriched	Vicinamibacteria
B19_NODE_1760_length_36560_cov_180.391974	0	0.00108866	0	UG_enriched	Chlamydiia
B19_NODE_1761_length_36555_cov_24.270301	0	0.000148889	0	UG_enriched	Gammaproteobacteria
B19_NODE_1762_length_36539_cov_64.301063	0	0.000389914	0	UG_enriched	Actinobacteria
B19_NODE_1763_length_36535_cov_18.196135	0	0.000109455	0	UG_enriched	Bacilli
B19_NODE_1764_length_36511_cov_52.778144	0	0.00131875	0	UG_enriched	Alphaproteobacteria
B19_NODE_1765_length_36475_cov_60.815376	4.83846e-05	0.00168847	0.000102915	FO_enriched	Actinobacteria
B19_NODE_1766_length_36475_cov_47.329462	0	0.000271068	0	UG_enriched	Planctomycetia
B19_NODE_1767_length_36471_cov_160.886671	0	0.000949563	0	UG_enriched	Flavobacteriia
B19_NODE_1768_length_36430_cov_43.331986	0	0.000533637	0	UG_enriched	Anaerolineae
B19_NODE_1769_length_36427_cov_413.562658	0	0.00301722	0	UG_enriched	Gammaproteobacteria
B19_NODE_1770_length_36404_cov_14.326474	0	0.000251686	0	UG_enriched	Deltaproteobacteria
B19_NODE_1771_length_36400_cov_14.375567	0	0.000114719	0	UG_enriched	Alphaproteobacteria
B19_NODE_1774_length_36363_cov_13.932549	0	8.21534e-05	0	UG_enriched	Acidobacteriia
B19_NODE_1775_length_36360_cov_16.953477	0	9.85176e-05	0	UG_enriched	Verrucomicrobiae
B19_NODE_1777_length_36353_cov_17.684721	0	0.000108605	0	UG_enriched	Acidobacteriia
B19_NODE_1778_length_36350_cov_25.391982	0	0.00022371	0	UG_enriched	Acidobacteriia
B19_NODE_1779_length_36348_cov_22.187584	0	0.000132721	0	UG_enriched	Alphaproteobacteria
B19_NODE_177_length_66637_cov_176.311285	0	0.00115249	0	UG_enriched	Alphaproteobacteria
B19_NODE_1780_length_36339_cov_35.079925	0	0.00033903	0	UG_enriched	Gammaproteobacteria
B19_NODE_1781_length_36333_cov_13.344672	0	0.000403626	0	UG_enriched	Alphaproteobacteria
B19_NODE_1782_length_36326_cov_37.650492	0	0.000341958	0	UG_enriched	Acidobacteriia
B19_NODE_1783_length_36297_cov_56.109569	0	0.000387635	0	UG_enriched	NAmissing
B19_NODE_1785_length_36283_cov_64.212294	0	0.000388649	0	UG_enriched	Deltaproteobacteria
B19_NODE_1787_length_36257_cov_15.519336	0	0.000237649	0	UG_enriched	Verrucomicrobiae
B19_NODE_1788_length_36233_cov_13.840704	0	0.000137895	0	UG_enriched	Vicinamibacteria
B19_NODE_178_length_66598_cov_16.702433	0	0.000100373	0	UG_enriched	Acidobacteriia
B19_NODE_1790_length_36192_cov_12.774884	0	0.000154898	0	UG_enriched	Actinobacteria
B19_NODE_1791_length_36173_cov_11.147350	0	6.61429e-05	0	UG_enriched	Acidobacteriia
B19_NODE_1792_length_36165_cov_54.802465	0	0.000460034	0	UG_enriched	Deltaproteobacteria
B19_NODE_1794_length_36151_cov_14.744459	0	8.99003e-05	0	UG_enriched	Bacteroidia
B19_NODE_1796_length_36121_cov_22.711030	0	0.000144954	0	UG_enriched	Verrucomicrobiae
B19_NODE_1797_length_36092_cov_8.986569	0	5.12678e-05	0	UG_enriched	NAmissing
B19_NODE_1798_length_36088_cov_20.040851	0	0.000126446	0	UG_enriched	Betaproteobacteria
B19_NODE_1799_length_36068_cov_14.255297	0	0.000348515	0	UG_enriched	Opitutae
B19_NODE_179_length_66530_cov_43.040421	0	0.000249955	0	UG_enriched	Vicinamibacteria
B19_NODE_17_length_109505_cov_40.226907	0	0.000586421	0	UG_enriched	NAmissing
B19_NODE_1800_length_36038_cov_47.711030	0	0.00140893	0	UG_enriched	NAmissing
B19_NODE_1801_length_36011_cov_19.241935	0	0.000114389	0	UG_enriched	Bacilli
B19_NODE_1802_length_35997_cov_33.899672	0	0.000208625	0	UG_enriched	Spirochaetia
B19_NODE_1803_length_35994_cov_17.596344	0	0.000137048	0	UG_enriched	Betaproteobacteria
B19_NODE_1805_length_35977_cov_12.738628	0	0.000109506	0	UG_enriched	Actinobacteria
B19_NODE_1806_length_35964_cov_70.805731	0	0.000558706	0	UG_enriched	Alphaproteobacteria
B19_NODE_1808_length_35952_cov_12.951249	0	7.92278e-05	0	UG_enriched	NAmissing
B19_NODE_180_length_66461_cov_28.312984	0	0.000447947	0	UG_enriched	Verrucomicrobiae
B19_NODE_1810_length_35951_cov_13.699437	0	0.000184562	0	UG_enriched	Verrucomicrobiae
B19_NODE_1811_length_35940_cov_15.313724	0	9.42942e-05	0	UG_enriched	Actinobacteria
B19_NODE_1813_length_35910_cov_11.706122	0	6.81845e-05	0	UG_enriched	Gammaproteobacteria
B19_NODE_1815_length_35901_cov_35.005524	0	0.000269655	0	UG_enriched	Actinobacteria
B19_NODE_1816_length_35875_cov_35.548409	0	0.000216041	0	UG_enriched	Sphingobacteriia
B19_NODE_1817_length_35868_cov_26.687292	0	0.000160055	0	UG_enriched	Bacteroidia
B19_NODE_1818_length_35840_cov_17.942350	0	0.000107086	0	UG_enriched	Acidobacteriia
B19_NODE_1819_length_35800_cov_10.121360	0	0.000694722	0	UG_enriched	Gammaproteobacteria
B19_NODE_181_length_66445_cov_25.053848	0	0.000313993	0	UG_enriched	Alphaproteobacteria
B19_NODE_1820_length_35790_cov_49.815923	0	0.000302533	0	UG_enriched	Gammaproteobacteria
B19_NODE_1821_length_35752_cov_240.670308	0	0.00410056	0	UG_enriched	Bacilli
B19_NODE_1822_length_35741_cov_361.420697	0	0.0021047	0	UG_enriched	Alphaproteobacteria
B19_NODE_1823_length_35715_cov_10.497112	0	0.000127478	0	UG_enriched	Betaproteobacteria
B19_NODE_1824_length_35710_cov_62.948591	0	0.000398875	0	UG_enriched	Acidobacteriia
B19_NODE_1826_length_35644_cov_12.964989	0	7.79633e-05	0	UG_enriched	Clostridia
B19_NODE_1827_length_35621_cov_18.944666	0	0.000111502	0	UG_enriched	NAmissing
B19_NODE_1828_length_35612_cov_196.009534	0	0.00132649	0	UG_enriched	Bacilli
B19_NODE_1829_length_35593_cov_9.519613	0	5.70329e-05	0	UG_enriched	Bacilli
B19_NODE_182_length_66334_cov_26.091583	0	0.000154467	0.000188985	AG_enriched	Vicinamibacteria
B19_NODE_1831_length_35591_cov_65.454469	0	0.00172151	0	UG_enriched	Ktedonobacteria
B19_NODE_1832_length_35498_cov_21.082245	0	0.000120433	0	UG_enriched	Acidobacteriia
B19_NODE_1833_length_35489_cov_23.146582	0	0.000133689	0	UG_enriched	Acidimicrobiia
B19_NODE_1834_length_35463_cov_73.290273	0	0.000438632	0	UG_enriched	Gammaproteobacteria
B19_NODE_1835_length_35462_cov_25.182647	0	0.000179528	0	UG_enriched	Vicinamibacteria
B19_NODE_1836_length_35453_cov_18.323069	0	0.000138016	0	UG_enriched	Vicinamibacteria
B19_NODE_1837_length_35451_cov_15.582721	0	9.11975e-05	0	UG_enriched	Actinobacteria
B19_NODE_1838_length_35408_cov_105.658699	0	0.00061767	0	UG_enriched	Betaproteobacteria
B19_NODE_183_length_66201_cov_28.843135	0	0.0005673	0	UG_enriched	Verrucomicrobiae
B19_NODE_1841_length_35376_cov_41.730727	0	0.000357127	0	UG_enriched	Actinobacteria
B19_NODE_1842_length_35376_cov_9.694912	0	5.93466e-05	0	UG_enriched	Gammaproteobacteria
B19_NODE_1843_length_35339_cov_46.354552	0	0.000272877	0	UG_enriched	Gammaproteobacteria
B19_NODE_1844_length_35317_cov_16.381062_fragment_1	0	0.000239788	0	UG_enriched	Gammaproteobacteria
B19_NODE_1845_length_35309_cov_20.783230	0	0.000191297	0	UG_enriched	Betaproteobacteria
B19_NODE_1846_length_35308_cov_93.163873	0	0.000556168	0	UG_enriched	Bacilli
B19_NODE_1847_length_35305_cov_18.841277	0	0.000112069	0	UG_enriched	Alphaproteobacteria
B19_NODE_1848_length_35303_cov_19.129738	0	0.000666562	0	UG_enriched	NAmissing
B19_NODE_1849_length_35300_cov_50.592056	0	0.000299052	0	UG_enriched	Flavobacteriia
B19_NODE_1850_length_35289_cov_56.239825	0	0.000378828	0	UG_enriched	Actinobacteria
B19_NODE_1853_length_35265_cov_101.788214	0	0.000636129	0.000100636	UG_enriched	Alphaproteobacteria
B19_NODE_1855_length_35241_cov_57.853351	0	0.000342105	0	UG_enriched	Bacilli
B19_NODE_1856_length_35234_cov_12.089343	0	0.000169701	0	UG_enriched	Alphaproteobacteria
B19_NODE_1857_length_35206_cov_16.217576	0	0.00015812	0	UG_enriched	Acidobacteriia
B19_NODE_1858_length_35203_cov_82.129623	0	0.000547935	0	UG_enriched	Actinobacteria
B19_NODE_1859_length_35201_cov_24.327178	0	0.000143496	0	UG_enriched	Acidobacteriia
B19_NODE_1860_length_35174_cov_10.229505	0	6.34449e-05	0	UG_enriched	Flavobacteriia
B19_NODE_1861_length_35159_cov_9.055977	0	9.57325e-05	0	UG_enriched	Deltaproteobacteria
B19_NODE_1864_length_35137_cov_53.561171	0	0.00035416	0	UG_enriched	Alphaproteobacteria
B19_NODE_1865_length_35132_cov_16.804316	0	0.00014281	0	UG_enriched	Acidobacteriia
B19_NODE_1866_length_35126_cov_9.517750	0	6.0589e-05	0	UG_enriched	Cytophagia
B19_NODE_1868_length_35092_cov_31.312327	0	0.00018711	0	UG_enriched	Alphaproteobacteria
B19_NODE_1869_length_35046_cov_17.280501	0	0.000589622	0	UG_enriched	Betaproteobacteria
B19_NODE_186_length_65792_cov_44.878425	7.12001e-05	0.00301229	0	FO_enriched	Alphaproteobacteria
B19_NODE_1870_length_35039_cov_141.215641	0	0.00127665	0	UG_enriched	Acidobacteriia
B19_NODE_1871_length_35033_cov_37.307393	0	0.000223411	0	UG_enriched	Alphaproteobacteria
B19_NODE_1872_length_35028_cov_12.488377	0	7.49323e-05	0	UG_enriched	Bacilli
B19_NODE_1873_length_35011_cov_24.528722	0	0.000146791	0	UG_enriched	Gammaproteobacteria
B19_NODE_1874_length_35001_cov_20.383449	0	0.000118464	0	UG_enriched	Clostridia
B19_NODE_1875_length_34975_cov_182.366982	0	0.00147467	0	UG_enriched	Actinobacteria
B19_NODE_1878_length_34947_cov_106.023157	0	0.000956175	0	UG_enriched	Armatimonadia
B19_NODE_1879_length_34947_cov_17.321334	0	0.000101774	0	UG_enriched	Spirochaetia
B19_NODE_187_length_65724_cov_185.024608	0	0.00128567	0	UG_enriched	Verrucomicrobiae
B19_NODE_1880_length_34916_cov_17.799920	0	0.000102398	0	UG_enriched	Betaproteobacteria
B19_NODE_1881_length_34866_cov_14.915199	0	8.74789e-05	0	UG_enriched	NAmissing
B19_NODE_1882_length_34854_cov_16.194517	0	9.97117e-05	0	UG_enriched	Spirochaetia
B19_NODE_1883_length_34847_cov_12.553489	0	0.000139609	0	UG_enriched	Thermoprotei
B19_NODE_1886_length_34835_cov_22.383870	0	0.000137707	0	UG_enriched	Clostridia
B19_NODE_1887_length_34831_cov_19.749166	0	0.000119188	0	UG_enriched	Alphaproteobacteria
B19_NODE_1888_length_34828_cov_95.179708	0	0.00205409	0	UG_enriched	NAmissing
B19_NODE_1889_length_34820_cov_11.699238	0	0.00113317	0	UG_enriched	Gammaproteobacteria
B19_NODE_188_length_65719_cov_36.276301	0	0.000292223	0	UG_enriched	Deltaproteobacteria
B19_NODE_1892_length_34743_cov_9.371685	0	5.56482e-05	0	UG_enriched	Sphingobacteriia
B19_NODE_1894_length_34729_cov_12.937734	0	7.85537e-05	0	UG_enriched	Bacilli
B19_NODE_1895_length_34714_cov_31.071843	0	0.00032945	0	UG_enriched	Planctomycetia
B19_NODE_1896_length_34705_cov_18.076190	0	0.000371767	0	UG_enriched	Alphaproteobacteria
B19_NODE_1897_length_34653_cov_45.616365	0	0.000314252	0	UG_enriched	Acidobacteriia
B19_NODE_1898_length_34646_cov_204.225290	0	0.000986792	0	UG_enriched	Alphaproteobacteria
B19_NODE_1899_length_34642_cov_665.201723	4.36799e-05	0.00394848	0	FO_enriched	Clostridia
B19_NODE_18_length_109355_cov_24.594163	0	0.000144073	0	UG_enriched	Verrucomicrobiae
B19_NODE_1904_length_34588_cov_59.061564	0	0.00300458	0	UG_enriched	Alphaproteobacteria
B19_NODE_1905_length_34567_cov_59.196598	0	0.00102435	0	UG_enriched	Gammaproteobacteria
B19_NODE_1906_length_34541_cov_17.894827	0	0.000104687	0	UG_enriched	Betaproteobacteria
B19_NODE_1908_length_34525_cov_18.319408	0	0.000105275	0	UG_enriched	Betaproteobacteria
B19_NODE_1909_length_34501_cov_15.035186	0	9.29228e-05	0	UG_enriched	Verrucomicrobiae
B19_NODE_190_length_65552_cov_25.171672	0	0.000202401	0	UG_enriched	Alphaproteobacteria
B19_NODE_1910_length_34479_cov_60.826691	0.000653338	0.000357529	0	FO_enriched	NAmissing
B19_NODE_1911_length_34463_cov_33.146972	0	0.000198146	0	UG_enriched	Acidobacteriia
B19_NODE_1912_length_34452_cov_11.570806	0	7.02339e-05	0	UG_enriched	Flavobacteriia
B19_NODE_1913_length_34451_cov_10.841871	0	0.000160217	0	UG_enriched	Acidobacteriia
B19_NODE_1914_length_34416_cov_12.554553	0	8.46839e-05	0	UG_enriched	Acidobacteriia
B19_NODE_1915_length_34411_cov_56.845762	0	0.00116491	0	UG_enriched	Betaproteobacteria
B19_NODE_1916_length_34386_cov_11.929918	0	0.000115595	0	UG_enriched	NAmissing
B19_NODE_1917_length_34343_cov_22.096010	0	0.000222837	0	UG_enriched	Acidobacteriia
B19_NODE_1919_length_34324_cov_66.248796	0	0.000395823	0	UG_enriched	Actinobacteria
B19_NODE_191_length_65552_cov_14.357207	0	8.40874e-05	0	UG_enriched	Verrucomicrobiae
B19_NODE_1920_length_34292_cov_11.272629	0	6.50767e-05	0	UG_enriched	Acidobacteriia
B19_NODE_1921_length_34252_cov_13.478697	0	0.000113044	0	UG_enriched	Acidobacteriia
B19_NODE_1922_length_34247_cov_15.500117	0	0.000171134	0	UG_enriched	Deltaproteobacteria
B19_NODE_1923_length_34243_cov_22.070961	0	0.000137218	0	UG_enriched	Clostridia
B19_NODE_1924_length_34229_cov_34.020425	0	0.00021148	0	UG_enriched	Alphaproteobacteria
B19_NODE_1925_length_34228_cov_28.635180	0	0.000171932	0	UG_enriched	Flavobacteriia
B19_NODE_1927_length_34190_cov_10.735872	0	6.73029e-05	0	UG_enriched	Alphaproteobacteria
B19_NODE_1928_length_34178_cov_15.214753	0	0.000423778	0	UG_enriched	Alphaproteobacteria
B19_NODE_1929_length_34161_cov_20.723714	0	0.000125444	0	UG_enriched	NAmissing
B19_NODE_1930_length_34121_cov_12.646891	0	0.000320284	0	UG_enriched	Acidobacteriia
B19_NODE_1931_length_34120_cov_15.912227	0	9.69898e-05	0	UG_enriched	Betaproteobacteria
B19_NODE_1932_length_34118_cov_18.061533	0	0.000108667	0	UG_enriched	Vicinamibacteria
B19_NODE_1933_length_34117_cov_26.463185	0	0.000184882	0	UG_enriched	Deltaproteobacteria
B19_NODE_1934_length_34098_cov_16.249097	0	0.000501047	0	UG_enriched	Betaproteobacteria
B19_NODE_1935_length_34088_cov_13.865307	0	7.9832e-05	0	UG_enriched	Sphingobacteriia
B19_NODE_1936_length_34076_cov_19.874813	0	0.000195948	0	UG_enriched	Alphaproteobacteria
B19_NODE_1937_length_34045_cov_55.407179	0	0.000270607	0	UG_enriched	Bacilli
B19_NODE_1938_length_34030_cov_55.760530	0	0.000647415	0	UG_enriched	Alphaproteobacteria
B19_NODE_193_length_65494_cov_126.011996	0	0.00111174	0	UG_enriched	NAmissing
B19_NODE_1941_length_33939_cov_13.811209	0	8.183e-05	0	UG_enriched	Bacilli
B19_NODE_1943_length_33925_cov_49.024240	0	0.000287148	0	UG_enriched	Gammaproteobacteria
B19_NODE_1944_length_33914_cov_12.216634	0	0.000162392	0	UG_enriched	Acidobacteriia
B19_NODE_1945_length_33911_cov_13.015005	0	0.000206409	7.40234e-05	AG_enriched	Actinobacteria
B19_NODE_1947_length_33879_cov_189.219253	0	0.00142666	0	UG_enriched	Planctomycetia
B19_NODE_1949_length_33856_cov_10.698411	0	6.54644e-05	0	UG_enriched	Flavobacteriia
B19_NODE_194_length_65335_cov_40.237423	0	0.000237254	0	UG_enriched	Gammaproteobacteria
B19_NODE_1950_length_33853_cov_14.288301	0	0.000131118	0	UG_enriched	Verrucomicrobiae
B19_NODE_1951_length_33842_cov_12.489360	0	7.78587e-05	0	UG_enriched	Planctomycetia
B19_NODE_1952_length_33838_cov_56.408045	0	0.000780257	0	UG_enriched	Planctomycetia
B19_NODE_1955_length_33792_cov_9.922192	0	6.1627e-05	0	UG_enriched	NAmissing
B19_NODE_1956_length_33790_cov_28.190929	0	0.000296973	0	UG_enriched	Gammaproteobacteria
B19_NODE_1957_length_33789_cov_28.976078	0	0.000172761	0	UG_enriched	Acidobacteriia
B19_NODE_1958_length_33783_cov_37.551826	0	0.000224655	0	UG_enriched	Acidobacteriia
B19_NODE_1960_length_33776_cov_27.047863	0	0.000154065	0	UG_enriched	Deltaproteobacteria
B19_NODE_1961_length_33755_cov_23.820148	0	0.000144724	0	UG_enriched	Flavobacteriia
B19_NODE_1962_length_33732_cov_32.140452	0	0.000395681	0	UG_enriched	Betaproteobacteria
B19_NODE_1963_length_33721_cov_12.932246	0	7.90928e-05	0	UG_enriched	Clostridia
B19_NODE_1965_length_33699_cov_67.736714	0	0.000873748	0	UG_enriched	Alphaproteobacteria
B19_NODE_1966_length_33677_cov_10.453632	0	6.385e-05	0	UG_enriched	Deltaproteobacteria
B19_NODE_1967_length_33673_cov_20.285026_fragment_1	0	0.000228999	0	UG_enriched	Alphaproteobacteria
B19_NODE_1968_length_33617_cov_10.921429	0	6.37624e-05	0	UG_enriched	Flavobacteriia
B19_NODE_1969_length_33604_cov_36.823810	0	0.000214033	0	UG_enriched	Acidobacteriia
B19_NODE_196_length_65248_cov_20.913104	0	0.000125979	0	UG_enriched	Gammaproteobacteria
B19_NODE_1972_length_33522_cov_19.552096	0.000105763	0.00012364	0	UG_enriched	Gammaproteobacteria
B19_NODE_1973_length_33510_cov_10.902048	0	6.60897e-05	0	UG_enriched	Deltaproteobacteria
B19_NODE_1974_length_33450_cov_16.665429	0	0.000136079	0	UG_enriched	Deltaproteobacteria
B19_NODE_1979_length_33384_cov_44.984818	0	0.000570569	0	UG_enriched	Deltaproteobacteria
B19_NODE_197_length_65154_cov_20.267454	0	0.000275134	0	UG_enriched	Alphaproteobacteria
B19_NODE_1981_length_33370_cov_421.526970	0	0.00260932	0	UG_enriched	Alphaproteobacteria
B19_NODE_1984_length_33327_cov_12.112647	0	7.09269e-05	0	UG_enriched	Acidobacteriia
B19_NODE_1986_length_33287_cov_14.926426	0	0.000177179	0	UG_enriched	Alphaproteobacteria
B19_NODE_1987_length_33282_cov_82.776026	0	0.000514877	0	UG_enriched	Planctomycetia
B19_NODE_1988_length_33276_cov_24.697571	0	0.000289405	0	UG_enriched	NAmissing
B19_NODE_1989_length_33258_cov_8.550914	0	5.12548e-05	0	UG_enriched	NAmissing
B19_NODE_198_length_65136_cov_27.030132	0	0.000201452	0	UG_enriched	Actinobacteria
B19_NODE_1990_length_33253_cov_7.661847	0	4.42815e-05	0	UG_enriched	Thermoprotei
B19_NODE_1991_length_33209_cov_35.123153	0	0.00021471	0	UG_enriched	Actinobacteria
B19_NODE_1992_length_33192_cov_18.530646	0	0.000111392	0	UG_enriched	Gammaproteobacteria
B19_NODE_1993_length_33179_cov_10.530914	0	9.96922e-05	0	UG_enriched	NAmissing
B19_NODE_1995_length_33158_cov_10.574963	0	0.000237175	0	UG_enriched	Acidobacteriia
B19_NODE_1996_length_33144_cov_13.218502	0	0.00010807	0	UG_enriched	Cytophagia
B19_NODE_1997_length_33139_cov_31.840981	0	0.000249659	0	UG_enriched	NAmissing
B19_NODE_1998_length_33125_cov_11.229120	0	0.000102141	0	UG_enriched	Alphaproteobacteria
B19_NODE_199_length_65055_cov_15.519277	0	9.07206e-05	0	UG_enriched	Gammaproteobacteria
B19_NODE_19_length_107305_cov_16.037846	0	9.44941e-05	0	UG_enriched	Clostridia
B19_NODE_2002_length_33062_cov_18.784228	0	0.000214702	0	UG_enriched	Thermoleophilia
B19_NODE_2003_length_33033_cov_13.240767	0	7.31996e-05	0	UG_enriched	Acidobacteriia
B19_NODE_2004_length_33005_cov_37.002094	0	0.000237138	0	UG_enriched	NAmissing
B19_NODE_2005_length_32984_cov_14.770871	0	0.000377844	0	UG_enriched	Alphaproteobacteria
B19_NODE_2007_length_32971_cov_35.184439	0	0.000736148	0	UG_enriched	Acidobacteriia
B19_NODE_2009_length_32958_cov_40.362095_fragment_1	0	0.000264203	0	UG_enriched	Acidobacteriia
B19_NODE_200_length_65038_cov_20.278057	0	0.000121123	0	UG_enriched	Verrucomicrobiae
B19_NODE_2010_length_32947_cov_14.058951	0	8.32653e-05	0	UG_enriched	NAmissing
B19_NODE_2012_length_32907_cov_10.994673	0	6.35418e-05	0	UG_enriched	Alphaproteobacteria
B19_NODE_2013_length_32897_cov_17.258297	0	9.6681e-05	0	UG_enriched	Acidobacteriia
B19_NODE_2014_length_32884_cov_19.694112	0	0.000165388	0	UG_enriched	Deltaproteobacteria
B19_NODE_2015_length_32847_cov_14.272566	0	8.38799e-05	0	UG_enriched	Actinobacteria
B19_NODE_2016_length_32817_cov_10.202613	0	6.46455e-05	0	UG_enriched	Alphaproteobacteria
B19_NODE_2017_length_32813_cov_24.665761	0	0.000310501	0	UG_enriched	Betaproteobacteria
B19_NODE_2018_length_32810_cov_14.043200	0	8.23735e-05	0	UG_enriched	Acidobacteriia
B19_NODE_201_length_64995_cov_35.131013	0	0.000352957	0	UG_enriched	Acidobacteriia
B19_NODE_2021_length_32761_cov_13.514890	7.53793e-05	0.000150001	0	FO_enriched	NAmissing
B19_NODE_2022_length_32737_cov_75.643045	0	0.000539611	0	UG_enriched	Gammaproteobacteria
B19_NODE_2023_length_32737_cov_14.098097	0	8.10561e-05	0	UG_enriched	Sphingobacteriia
B19_NODE_2024_length_32732_cov_1743.616917	0	0.0100003	0	UG_enriched	Bacilli
B19_NODE_2025_length_32690_cov_22.730933	0	0.000308871	0	UG_enriched	Alphaproteobacteria
B19_NODE_2026_length_32690_cov_10.068332_fragment_1	0	5.65408e-05	0	UG_enriched	Clostridia
B19_NODE_2027_length_32685_cov_21.672786	0	0.000132457	0	UG_enriched	Betaproteobacteria
B19_NODE_2029_length_32672_cov_13.959898	0	0.000340898	0	UG_enriched	Alphaproteobacteria
B19_NODE_202_length_64819_cov_52.959808	0	0.000313672	0	UG_enriched	Alphaproteobacteria
B19_NODE_2030_length_32670_cov_32.424314	0	0.000190089	0	UG_enriched	Actinobacteria
B19_NODE_2031_length_32669_cov_17.437542	0	0.00026639	0	UG_enriched	NAmissing
B19_NODE_2032_length_32650_cov_90.547845	0	0.000524272	0	UG_enriched	Bacteroidia
B19_NODE_2033_length_32552_cov_28.810106	0	0.000297772	0	UG_enriched	Betaproteobacteria
B19_NODE_2034_length_32544_cov_11.840531	0	6.77911e-05	0	UG_enriched	Betaproteobacteria
B19_NODE_2035_length_32521_cov_18.044385	0	0.000590157	0	UG_enriched	Planctomycetia
B19_NODE_2036_length_32517_cov_10.923110	0	0.000122789	0	UG_enriched	Acidobacteriia
B19_NODE_2037_length_32511_cov_12.144904	0	7.30719e-05	0	UG_enriched	Deltaproteobacteria
B19_NODE_2038_length_32509_cov_10.143958	0	0.000131685	0	UG_enriched	Gammaproteobacteria
B19_NODE_203_length_64814_cov_41.897157	0	0.000246403	0	UG_enriched	Actinobacteria
B19_NODE_2041_length_32383_cov_16.937330	0	9.9419e-05	0.000115433	UG_enriched	Verrucomicrobiae
B19_NODE_2042_length_32379_cov_25.170926	0	0.000130205	0	UG_enriched	Sphingobacteriia
B19_NODE_2043_length_32375_cov_50.891677	0	0.000444776	0	UG_enriched	Alphaproteobacteria
B19_NODE_2044_length_32346_cov_10.750085	0	6.44343e-05	0	UG_enriched	Actinobacteria
B19_NODE_2045_length_32338_cov_110.162222	0	0.000642197	0	UG_enriched	Gammaproteobacteria
B19_NODE_2046_length_32335_cov_11.494331	0	0.000109471	0	UG_enriched	Acidobacteriia
B19_NODE_2048_length_32245_cov_18.209071	0	0.000111616	0	UG_enriched	Bacilli
B19_NODE_2049_length_32220_cov_12.128991	0	7.21542e-05	0	UG_enriched	Verrucomicrobiae
B19_NODE_204_length_64809_cov_50.445424	0	0.000513784	0	UG_enriched	Actinobacteria
B19_NODE_2050_length_32206_cov_20.976268	0	0.000124904	0	UG_enriched	Betaproteobacteria
B19_NODE_2052_length_32196_cov_10.130083	0	0.000117637	0	UG_enriched	Alphaproteobacteria
B19_NODE_2055_length_32070_cov_30.804498	0	0.000215438	0	UG_enriched	Verrucomicrobiae
B19_NODE_2056_length_32062_cov_11.175274	0	6.61149e-05	0	UG_enriched	Thermoprotei
B19_NODE_2057_length_32037_cov_15.142236	0	9.28236e-05	0	UG_enriched	Bacilli
B19_NODE_2059_length_32017_cov_10.694575	0	0.000127968	0	UG_enriched	Acidobacteriia
B19_NODE_205_length_64651_cov_38.613598	0	0.000266367	0	UG_enriched	Actinobacteria
B19_NODE_2060_length_32012_cov_96.656695	0	0.000556794	0	UG_enriched	Cytophagia
B19_NODE_2061_length_31995_cov_16.161960	0	0.000136199	0	UG_enriched	Gammaproteobacteria
B19_NODE_2062_length_31978_cov_10.398427	0	5.93471e-05	0	UG_enriched	Acidobacteriia
B19_NODE_2064_length_31963_cov_10.271405	0	6.22907e-05	0	UG_enriched	Bacilli
B19_NODE_2065_length_31945_cov_1414.331201	0	0.00847928	0	UG_enriched	Bacilli
B19_NODE_2066_length_31901_cov_30.313729	0	0.00022786	0	UG_enriched	Alphaproteobacteria
B19_NODE_2067_length_31895_cov_14.595729_fragment_1	0	0.000296123	0	UG_enriched	Betaproteobacteria
B19_NODE_2068_length_31888_cov_9.970754	0	5.91958e-05	0	UG_enriched	Oligoflexia
B19_NODE_2069_length_31870_cov_24.111928	0	0.000170402	0	UG_enriched	Betaproteobacteria
B19_NODE_206_length_64574_cov_37.185976	0	0.000496463	0	UG_enriched	Acidobacteriia
B19_NODE_2070_length_31868_cov_17.551598	0	0.000101079	0	UG_enriched	Verrucomicrobiae
B19_NODE_2071_length_31863_cov_46.305929	0	0.00028382	0	UG_enriched	Betaproteobacteria
B19_NODE_2072_length_31829_cov_24.173853	0	0.000267168	0	UG_enriched	Actinobacteria
B19_NODE_2073_length_31817_cov_14.913104	0	0.000119171	0	UG_enriched	NAmissing
B19_NODE_2074_length_31801_cov_9.486392	0	5.12054e-05	0	UG_enriched	Acidobacteriia
B19_NODE_2076_length_31772_cov_26.300754	0	0.000158183	0	UG_enriched	Acidobacteriia
B19_NODE_2077_length_31767_cov_14.301305	0	0.000281708	0	UG_enriched	Vicinamibacteria
B19_NODE_207_length_64550_cov_16.553252	0	0.000157227	0	UG_enriched	Deltaproteobacteria
B19_NODE_2080_length_31739_cov_21.194199	0	0.00012797	0	UG_enriched	Acidobacteriia
B19_NODE_2081_length_31732_cov_12.904663	0	0.00013809	0	UG_enriched	Thermoleophilia
B19_NODE_2086_length_31683_cov_910.998008	0	0.00496141	0	UG_enriched	NAmissing
B19_NODE_2087_length_31670_cov_14.949929	0	0.000117354	0	UG_enriched	Alphaproteobacteria
B19_NODE_2088_length_31600_cov_12.385925	0	0.000110617	0	UG_enriched	NAmissing
B19_NODE_2089_length_31585_cov_61.021059	0	0.000366361	0	UG_enriched	NAmissing
B19_NODE_208_length_64528_cov_14.706575	0	0.000251116	0	UG_enriched	Deltaproteobacteria
B19_NODE_2092_length_31559_cov_13.334180	0	0.000132203	0	UG_enriched	NAmissing
B19_NODE_2096_length_31501_cov_151.075972	0	0.000910464	0	UG_enriched	Gammaproteobacteria
B19_NODE_2097_length_31484_cov_43.051577	0	0.000289065	0	UG_enriched	Nitriliruptoria
B19_NODE_2099_length_31437_cov_19.421675	0	0.000332456	0	UG_enriched	Gammaproteobacteria
B19_NODE_209_length_64518_cov_16.041931	0	9.49162e-05	0	UG_enriched	Gammaproteobacteria
B19_NODE_20_length_105867_cov_109.811089	0	0.000671705	0	UG_enriched	Clostridia
B19_NODE_2101_length_31374_cov_13.491587	0	8.28492e-05	0	UG_enriched	Alphaproteobacteria
B19_NODE_2102_length_31327_cov_26.187356	0	0.000158537	0	UG_enriched	Acidobacteriia
B19_NODE_2104_length_31309_cov_15.967652	0	9.62808e-05	0.000201275	UG_enriched	Betaproteobacteria
B19_NODE_2107_length_31229_cov_14.274107	0	0.000170902	0	UG_enriched	Betaproteobacteria
B19_NODE_2108_length_31229_cov_11.749727	0	0.00035397	0	UG_enriched	Betaproteobacteria
B19_NODE_2109_length_31219_cov_640.496374	0	0.00475284	0	UG_enriched	Actinobacteria
B19_NODE_210_length_64513_cov_25.909321_fragment_2	0	0.000162669	0	UG_enriched	NAmissing
B19_NODE_2112_length_31184_cov_8.318963	0	5.11861e-05	0	UG_enriched	Alphaproteobacteria
B19_NODE_2115_length_31117_cov_18.781727	0	0.000161029	0	UG_enriched	Betaproteobacteria
B19_NODE_2117_length_31051_cov_19.383017	0	0.000118036	0	UG_enriched	Actinobacteria
B19_NODE_211_length_64500_cov_13.193250	0	8.05725e-05	0	UG_enriched	Planctomycetia
B19_NODE_2120_length_31003_cov_30.026108	0	0.000427689	0	UG_enriched	Alphaproteobacteria
B19_NODE_2122_length_30967_cov_11.438859	0	6.74131e-05	0	UG_enriched	Thermoleophilia
B19_NODE_2123_length_30954_cov_11.412311	0	7.12733e-05	0	UG_enriched	Cytophagia
B19_NODE_2128_length_30906_cov_32.907426	0	0.000804251	0	UG_enriched	Acidobacteriia
B19_NODE_212_length_64493_cov_62.910891	0	0.000515814	0	UG_enriched	Flavobacteriia
B19_NODE_2132_length_30837_cov_13.443051	0	8.07752e-05	0	UG_enriched	Vicinamibacteria
B19_NODE_2134_length_30814_cov_25.294580	0	0.000350656	0	UG_enriched	Betaproteobacteria
B19_NODE_2135_length_30812_cov_13.879117	0	8.07858e-05	0	UG_enriched	Actinobacteria
B19_NODE_2136_length_30791_cov_50.607854	0	0.000340289	0	UG_enriched	Clostridia
B19_NODE_2138_length_30775_cov_10.179785	0	6.0731e-05	0	UG_enriched	Acidobacteriia
B19_NODE_213_length_64441_cov_15.124188	0	8.99547e-05	0	UG_enriched	Deltaproteobacteria
B19_NODE_2140_length_30740_cov_9.655728	0	5.84299e-05	0	UG_enriched	Gammaproteobacteria
B19_NODE_2142_length_30729_cov_26.223577	0	0.000149491	0	UG_enriched	Betaproteobacteria
B19_NODE_2143_length_30701_cov_14.083991	4.71352e-05	0.000232471	0	FO_enriched	Acidobacteriia
B19_NODE_2144_length_30683_cov_51.194267	0	0.000276391	0	UG_enriched	NAmissing
B19_NODE_2145_length_30677_cov_36.035791	0	0.000214259	0	UG_enriched	Alphaproteobacteria
B19_NODE_2146_length_30668_cov_11.485415	0	6.64128e-05	0	UG_enriched	Clostridia
B19_NODE_2147_length_30659_cov_10.398902	0	5.91922e-05	0	UG_enriched	Gammaproteobacteria
B19_NODE_2149_length_30633_cov_13.809700	0	0.000170682	0	UG_enriched	Acidobacteriia
B19_NODE_214_length_64439_cov_21.150301	0	0.000126061	0	UG_enriched	Flavobacteriia
B19_NODE_2150_length_30631_cov_24.698816	0	0.000222008	0	UG_enriched	Alphaproteobacteria
B19_NODE_2151_length_30618_cov_14.783758	0	8.81047e-05	0	UG_enriched	Gammaproteobacteria
B19_NODE_2152_length_30605_cov_11.049296	0	6.02932e-05	0	UG_enriched	NAmissing
B19_NODE_2153_length_30604_cov_13.469835	0	8.05597e-05	0	UG_enriched	Acidobacteriia
B19_NODE_2154_length_30580_cov_52.274103	0	0.000390725	0	UG_enriched	Betaproteobacteria
B19_NODE_2155_length_30565_cov_16.879974	0	9.70167e-05	0	UG_enriched	Alphaproteobacteria
B19_NODE_2156_length_30549_cov_13.390536_fragment_1	0	7.79185e-05	0	UG_enriched	Acidobacteriia
B19_NODE_2158_length_30536_cov_49.222696_fragment_1	0	0.00081266	0	UG_enriched	Alphaproteobacteria
B19_NODE_2159_length_30432_cov_15.745827	0	9.48794e-05	0	UG_enriched	Ktedonobacteria
B19_NODE_215_length_64438_cov_44.748955	0	0.000324898	0	UG_enriched	Betaproteobacteria
B19_NODE_2162_length_30380_cov_13.092894	0	8.29385e-05	0	UG_enriched	Alphaproteobacteria
B19_NODE_2163_length_30378_cov_10.368367	0	8.55403e-05	0	UG_enriched	Deltaproteobacteria
B19_NODE_2164_length_30372_cov_12.129663	0	7.30854e-05	0	UG_enriched	Gammaproteobacteria
B19_NODE_2165_length_30351_cov_22.479337	0	0.000779501	0	UG_enriched	Alphaproteobacteria
B19_NODE_2166_length_30346_cov_14.881879	0	8.64934e-05	0	UG_enriched	Deltaproteobacteria
B19_NODE_2167_length_30344_cov_10.263396	0	6.34922e-05	0	UG_enriched	Actinobacteria
B19_NODE_216_length_64401_cov_34.289187	0	0.00051757	0	UG_enriched	Actinobacteria
B19_NODE_2170_length_30324_cov_14.209026	0	8.25887e-05	0	UG_enriched	NAmissing
B19_NODE_2171_length_30323_cov_9.784756_fragment_1	0	6.69593e-05	0	UG_enriched	Clostridia
B19_NODE_2172_length_30282_cov_54.142158	0	0.000410845	0	UG_enriched	Deltaproteobacteria
B19_NODE_2173_length_30275_cov_12.348147	0	7.16405e-05	0	UG_enriched	Gammaproteobacteria
B19_NODE_2174_length_30271_cov_10.331248	0	0.000119028	0	UG_enriched	Alphaproteobacteria
B19_NODE_2176_length_30256_cov_53.924340	0	0.000304439	0	UG_enriched	Bacilli
B19_NODE_2177_length_30250_cov_11.696605	0	7.06354e-05	0	UG_enriched	NAmissing
B19_NODE_2178_length_30209_cov_12.864396	0	7.56113e-05	0	UG_enriched	Acidobacteriia
B19_NODE_2179_length_30183_cov_27.407030	0	0.00314473	0	UG_enriched	Alphaproteobacteria
B19_NODE_2180_length_30179_cov_18.437724	0	0.000109543	0	UG_enriched	Alphaproteobacteria
B19_NODE_2182_length_30173_cov_19.693174	0	0.000184462	0	UG_enriched	Actinobacteria
B19_NODE_2183_length_30160_cov_126.285434	0	0.000737452	0	UG_enriched	Flavobacteriia
B19_NODE_2185_length_30114_cov_8.959247	0	0.000121529	0	UG_enriched	Deltaproteobacteria
B19_NODE_2186_length_30101_cov_13.702456	0	0.000112686	0	UG_enriched	Actinobacteria
B19_NODE_2187_length_30101_cov_12.043400	0	0.000110053	0	UG_enriched	Actinobacteria
B19_NODE_2188_length_30076_cov_43.316545	0	0.00025426	0	UG_enriched	Acidobacteriia
B19_NODE_2189_length_30068_cov_13.838737	0	0.000471294	0	UG_enriched	Gammaproteobacteria
B19_NODE_218_length_64057_cov_15.422487	0	0.000188233	0	UG_enriched	Deltaproteobacteria
B19_NODE_2190_length_30061_cov_15.815737	0	0.000143384	0	UG_enriched	Alphaproteobacteria
B19_NODE_2191_length_30059_cov_48.441908	0	0.00029144	0	UG_enriched	Actinobacteria
B19_NODE_2192_length_30017_cov_44.470830	0	0.000261308	0	UG_enriched	Acidobacteriia
B19_NODE_2197_length_29966_cov_16.589348	0	0.000101218	0	UG_enriched	Betaproteobacteria
B19_NODE_2198_length_29964_cov_11.439868	0	7.09138e-05	0	UG_enriched	Gammaproteobacteria
B19_NODE_21_length_105384_cov_17.834044	0	0.000862357	0	UG_enriched	Deltaproteobacteria
B19_NODE_2200_length_29917_cov_17.569352	0	0.000108577	0	UG_enriched	Cytophagia
B19_NODE_2201_length_29899_cov_9.899008	0	5.83165e-05	0	UG_enriched	Flavobacteriia
B19_NODE_2202_length_29894_cov_35.038339	0	0.000300119	0	UG_enriched	Gammaproteobacteria
B19_NODE_2203_length_29891_cov_116.060933	0	0.000685814	0	UG_enriched	Bacilli
B19_NODE_2204_length_29885_cov_133.249413	0	0.00113627	0	UG_enriched	Actinobacteria
B19_NODE_2205_length_29854_cov_10.921340	0	7.11183e-05	0	UG_enriched	Acidobacteriia
B19_NODE_2206_length_29830_cov_15.928766	0	0.000115643	0	UG_enriched	Acidobacteriia
B19_NODE_2207_length_29819_cov_27.756585	0	0.00378588	0	UG_enriched	Acidobacteriia
B19_NODE_2208_length_29769_cov_10.176819	0	6.31818e-05	0	UG_enriched	Clostridia
B19_NODE_2209_length_29768_cov_13.189412	0	0.000360852	0	UG_enriched	Vicinamibacteria
B19_NODE_220_length_63913_cov_18.376930	0	0.000143359	0	UG_enriched	Acidobacteriia
B19_NODE_2210_length_29754_cov_22.541163	0	0.000132806	0	UG_enriched	Actinobacteria
B19_NODE_2211_length_29747_cov_6.998013	0	4.23232e-05	0	UG_enriched	Clostridia
B19_NODE_2212_length_29734_cov_12.773476	0	0.000156697	0	UG_enriched	Acidobacteriia
B19_NODE_2213_length_29703_cov_14.198293	0	8.31174e-05	0	UG_enriched	Alphaproteobacteria
B19_NODE_2214_length_29689_cov_9.968415	0	5.793e-05	0	UG_enriched	Gammaproteobacteria
B19_NODE_2215_length_29652_cov_75.816198	0	0.000445789	0	UG_enriched	Acidobacteriia
B19_NODE_2217_length_29620_cov_15.566887	0	9.53066e-05	0	UG_enriched	Alphaproteobacteria
B19_NODE_2218_length_29583_cov_11.575352	0	7.14261e-05	0	UG_enriched	Acidobacteriia
B19_NODE_221_length_63904_cov_16.850804	0	0.000134522	0	UG_enriched	Planctomycetia
B19_NODE_2220_length_29567_cov_11.395737	0	0.000147527	0	UG_enriched	Actinobacteria
B19_NODE_2221_length_29551_cov_15.758916	0	0.000272906	0	UG_enriched	Gammaproteobacteria
B19_NODE_2222_length_29539_cov_23.754681	0	0.000134293	0	UG_enriched	Bacilli
B19_NODE_2223_length_29522_cov_27.325652	0	0.000161227	0	UG_enriched	NAmissing
B19_NODE_2224_length_29503_cov_12.613522	0	7.35151e-05	0	UG_enriched	Bacteroidia
B19_NODE_2225_length_29499_cov_9.247453	0	5.85903e-05	0	UG_enriched	Actinobacteria
B19_NODE_2226_length_29498_cov_12.466630	0	7.40446e-05	0	UG_enriched	Bacilli
B19_NODE_2227_length_29461_cov_15.630075	0	9.00694e-05	0	UG_enriched	Gammaproteobacteria
B19_NODE_2228_length_29450_cov_12.626365	0	0.000322947	0	UG_enriched	Actinobacteria
B19_NODE_2229_length_29444_cov_50.886352	0	0.000444509	0	UG_enriched	Bacilli
B19_NODE_222_length_63863_cov_26.342167	0	0.00030906	0	UG_enriched	Nitrospira
B19_NODE_2230_length_29435_cov_23.315895	0	0.000351145	0	UG_enriched	Betaproteobacteria
B19_NODE_2231_length_29407_cov_59.356023	0.000885631	0.00040894	0	FO_enriched	Alphaproteobacteria
B19_NODE_2232_length_29401_cov_11.068357	0	6.39726e-05	0	UG_enriched	Gammaproteobacteria
B19_NODE_2233_length_29390_cov_17.623862	0	0.000216209	0	UG_enriched	Deltaproteobacteria
B19_NODE_2234_length_29385_cov_35.093658	0	0.000377546	0	UG_enriched	Alphaproteobacteria
B19_NODE_2236_length_29374_cov_10.632082	0	6.80117e-05	0	UG_enriched	Acidobacteriia
B19_NODE_2237_length_29367_cov_12.623635	0	7.24131e-05	0	UG_enriched	Ktedonobacteria
B19_NODE_2238_length_29338_cov_12.927671	0.000287908	7.65276e-05	0	UG_enriched	Acidobacteriia
B19_NODE_2239_length_29332_cov_220.024593	0	0.00272138	5.29294e-05	AG_enriched	Actinobacteria
B19_NODE_223_length_63808_cov_15.793672	0	0.000255087	0	UG_enriched	Alphaproteobacteria
B19_NODE_2240_length_29324_cov_41.481160	0	0.00103927	0	UG_enriched	Deltaproteobacteria
B19_NODE_2241_length_29323_cov_11.630415	0	0.000147015	0	UG_enriched	Gammaproteobacteria
B19_NODE_2242_length_29321_cov_16.772706	0	0.000226762	0	UG_enriched	Betaproteobacteria
B19_NODE_2244_length_29294_cov_18.033106	0	0.000120025	0	UG_enriched	NAmissing
B19_NODE_2247_length_29238_cov_26.229860	0	0.000202531	0	UG_enriched	Betaproteobacteria
B19_NODE_2249_length_29202_cov_10.183552	0	6.24356e-05	0	UG_enriched	NAmissing
B19_NODE_224_length_63745_cov_51.508149	0	0.000311062	0	UG_enriched	Clostridia
B19_NODE_2250_length_29201_cov_24.010118	0	0.000210133	0	UG_enriched	NAmissing
B19_NODE_2251_length_29200_cov_20.722834	0	0.000174235	0	UG_enriched	Acidobacteriia
B19_NODE_2254_length_29165_cov_16.677602	0	0.00060097	0.00100557	AG_enriched	Acidobacteriia
B19_NODE_2255_length_29146_cov_16.204187	0	0.00015886	0	UG_enriched	Planctomycetia
B19_NODE_2256_length_29142_cov_116.850517	0	0.00270964	0	UG_enriched	Acidobacteriia
B19_NODE_2258_length_29130_cov_13.198624	0	8.35308e-05	0	UG_enriched	Spirochaetia
B19_NODE_2259_length_29121_cov_10.916672	0	9.20542e-05	0	UG_enriched	Clostridia
B19_NODE_225_length_63654_cov_201.268102	0.000246108	0.00132558	0	UG_enriched	NAmissing
B19_NODE_2260_length_29064_cov_14.222758	0	0.000174036	0.000572088	AG_enriched	Acidobacteriia
B19_NODE_2261_length_28971_cov_11.384043	0	0.00044358	0	UG_enriched	Alphaproteobacteria
B19_NODE_2265_length_28906_cov_63.859000	0	0.000416616	0	UG_enriched	Actinobacteria
B19_NODE_2266_length_28893_cov_14.799813	0	9.44205e-05	0	UG_enriched	Alphaproteobacteria
B19_NODE_2267_length_28875_cov_11.015614	0	6.83655e-05	0	UG_enriched	Thermoleophilia
B19_NODE_2268_length_28824_cov_10.332267	0	6.29017e-05	0	UG_enriched	Alphaproteobacteria
B19_NODE_226_length_63571_cov_33.555088	0	0.000201749	0	UG_enriched	NAmissing
B19_NODE_2270_length_28816_cov_34.705643	0	0.000314375	0	UG_enriched	Verrucomicrobiae
B19_NODE_2271_length_28803_cov_52.135731	0	0.00190128	0	UG_enriched	NAmissing
B19_NODE_2272_length_28803_cov_14.293794	0	0.000115756	0	UG_enriched	Actinobacteria
B19_NODE_2273_length_28784_cov_40.637474	0	0.000373805	0	UG_enriched	Gammaproteobacteria
B19_NODE_2274_length_28769_cov_12.521105	0	8.66405e-05	0	UG_enriched	Gammaproteobacteria
B19_NODE_2275_length_28765_cov_14.600627	0	8.73005e-05	0	UG_enriched	Betaproteobacteria
B19_NODE_2276_length_28765_cov_10.227726	0	9.29173e-05	0	UG_enriched	Bacilli
B19_NODE_2278_length_28743_cov_173.763664	0	0.00760864	0	UG_enriched	Actinobacteria
B19_NODE_2281_length_28710_cov_41.231513	0	0.000714764	0	UG_enriched	Acidobacteriia
B19_NODE_2282_length_28698_cov_13.968090	0	8.40207e-05	0	UG_enriched	Bacilli
B19_NODE_2283_length_28686_cov_12.695470	0	0.000492781	0	UG_enriched	Acidobacteriia
B19_NODE_2284_length_28662_cov_29.835949	0	0.00017913	0	UG_enriched	Alphaproteobacteria
B19_NODE_2286_length_28646_cov_43.310098	0	0.000256483	0	UG_enriched	NAmissing
B19_NODE_2287_length_28638_cov_19.416821	0	0.000207982	0	UG_enriched	Gammaproteobacteria
B19_NODE_2288_length_28633_cov_91.646126	0	0.000636228	0	UG_enriched	Gammaproteobacteria
B19_NODE_2289_length_28631_cov_9.432601	0	8.48324e-05	0	UG_enriched	Alphaproteobacteria
B19_NODE_228_length_63428_cov_18.256750	0	0.00010571	0	UG_enriched	Actinobacteria
B19_NODE_2297_length_28446_cov_100.063893	0	0.00274167	0	UG_enriched	Actinobacteria
B19_NODE_2298_length_28443_cov_16.693180	0	0.000100025	0	UG_enriched	Deltaproteobacteria
B19_NODE_2299_length_28434_cov_31.431763	0	0.000276521	0	UG_enriched	NAmissing
B19_NODE_229_length_63407_cov_568.896846	0.000247956	0.00578635	0	UG_enriched	Bacilli
B19_NODE_22_length_102447_cov_13.123183	0	7.27555e-05	0	UG_enriched	Gammaproteobacteria
B19_NODE_2301_length_28421_cov_12.122400	0	7.38694e-05	0	UG_enriched	Gammaproteobacteria
B19_NODE_2303_length_28387_cov_10.227022	0	5.8259e-05	0	UG_enriched	Bacilli
B19_NODE_2305_length_28383_cov_13.197296	0	8.44159e-05	0	UG_enriched	Deltaproteobacteria
B19_NODE_2308_length_28359_cov_13.091471	0	0.000207072	0	UG_enriched	Acidobacteriia
B19_NODE_2309_length_28357_cov_65.510176	0	0.000584254	0	UG_enriched	Acidobacteriia
B19_NODE_2310_length_28353_cov_34.255919	0	0.000292169	0	UG_enriched	Betaproteobacteria
B19_NODE_2311_length_28309_cov_21.507433	0	0.000204689	0	UG_enriched	Acidobacteriia
B19_NODE_2313_length_28291_cov_14.620484	0	0.00024866	0	UG_enriched	Verrucomicrobiae
B19_NODE_2315_length_28284_cov_9.849977	0	0.000122522	0	UG_enriched	NAmissing
B19_NODE_2317_length_28237_cov_14.438187	0	0.000191411	0	UG_enriched	Chloroflexia
B19_NODE_2318_length_28225_cov_37.097125	0	0.000218525	0	UG_enriched	Gammaproteobacteria
B19_NODE_2319_length_28218_cov_13.475908	0	8.17269e-05	0	UG_enriched	Thermoleophilia
B19_NODE_231_length_63272_cov_175.120632	0.00180741	0.00157841	0	FO_enriched	Betaproteobacteria
B19_NODE_2321_length_28191_cov_82.076592	0	0.000539193	0	UG_enriched	NAmissing
B19_NODE_2323_length_28174_cov_14.336250	0	0.000103728	0	UG_enriched	Gammaproteobacteria
B19_NODE_2326_length_28166_cov_39.710505	0	0.000735999	0	UG_enriched	Betaproteobacteria
B19_NODE_2328_length_28126_cov_43.014356	0	0.0014879	0	UG_enriched	Actinobacteria
B19_NODE_2329_length_28104_cov_25.305287	0	0.000302183	0	UG_enriched	Alphaproteobacteria
B19_NODE_232_length_63152_cov_17.899361	0	0.000357031	0	UG_enriched	Planctomycetia
B19_NODE_2330_length_28103_cov_42.411865	0	0.000337513	0	UG_enriched	Betaproteobacteria
B19_NODE_2332_length_28089_cov_44.827353	0	0.000622028	0	UG_enriched	Actinobacteria
B19_NODE_2333_length_28048_cov_50.431394	0	0.000282069	0	UG_enriched	Spirochaetia
B19_NODE_2334_length_28047_cov_20.454809	0	0.000151069	0	UG_enriched	Betaproteobacteria
B19_NODE_2338_length_27985_cov_19.028285	0	0.000111108	0	UG_enriched	Gammaproteobacteria
B19_NODE_233_length_63147_cov_44.053858	0	0.00074905	0	UG_enriched	Verrucomicrobiae
B19_NODE_2340_length_27923_cov_9.809889	0	5.80741e-05	0	UG_enriched	Bacteroidia
B19_NODE_2341_length_27920_cov_17.473928	0.000177151	0.000157094	0	FO_enriched	Planctomycetia
B19_NODE_2342_length_27902_cov_10.343664	0	6.01219e-05	0	UG_enriched	Gammaproteobacteria
B19_NODE_2346_length_27853_cov_15.005144	0	9.15582e-05	0	UG_enriched	Actinobacteria
B19_NODE_2347_length_27848_cov_16.154967	0	0.000157401	0	UG_enriched	Alphaproteobacteria
B19_NODE_2349_length_27779_cov_52.853196	0	0.000549764	0	UG_enriched	Acidobacteriia
B19_NODE_234_length_63109_cov_19.014321	0	0.000158217	0	UG_enriched	Gammaproteobacteria
B19_NODE_2352_length_27750_cov_16.441379	0	0.00103028	0.000767659	UG_enriched	Alphaproteobacteria
B19_NODE_2353_length_27732_cov_10.960978	0	6.70283e-05	0	UG_enriched	NAmissing
B19_NODE_2358_length_27684_cov_9.632958	0	0.00013246	0	UG_enriched	Acidobacteriia
B19_NODE_235_length_63087_cov_33.803846	0	0.000308376	0	UG_enriched	Betaproteobacteria
B19_NODE_2361_length_27669_cov_18.151698	0	0.000104354	0	UG_enriched	Deltaproteobacteria
B19_NODE_2366_length_27556_cov_10.116941	0	5.83556e-05	0	UG_enriched	Verrucomicrobiae
B19_NODE_2368_length_27537_cov_44.359362	0	0.000262443	0	UG_enriched	Flavobacteriia
B19_NODE_2369_length_27527_cov_11.321418	0	0.000136565	0	UG_enriched	Gammaproteobacteria
B19_NODE_2370_length_27515_cov_13.259650	0	7.69792e-05	0	UG_enriched	Acidobacteriia
B19_NODE_2371_length_27509_cov_10.570482	0	6.44918e-05	0	UG_enriched	Gammaproteobacteria
B19_NODE_2372_length_27508_cov_16.275198	0	0.000284892	0	UG_enriched	Deltaproteobacteria
B19_NODE_2373_length_27493_cov_27.207705	0	0.000847308	0	UG_enriched	Alphaproteobacteria
B19_NODE_2375_length_27473_cov_16.872018	0	0.000311866	0	UG_enriched	Actinobacteria
B19_NODE_2377_length_27444_cov_10.847968	0	6.2854e-05	0	UG_enriched	Cytophagia
B19_NODE_2379_length_27416_cov_36.315120	9.69599e-05	0.000216938	0	FO_enriched	Actinobacteria
B19_NODE_237_length_63019_cov_32.477622	0	0.000194106	0	UG_enriched	Verrucomicrobiae
B19_NODE_2381_length_27406_cov_8.652700	0	0.000112627	0	UG_enriched	Acidobacteriia
B19_NODE_2382_length_27405_cov_54.901316	0	0.000420139	0	UG_enriched	Planctomycetia
B19_NODE_2384_length_27365_cov_8.307397	0	5.29424e-05	0	UG_enriched	Clostridia
B19_NODE_2386_length_27328_cov_19.308107	0	0.000242423	0	UG_enriched	Alphaproteobacteria
B19_NODE_2387_length_27320_cov_9.117733	0	5.50143e-05	0	UG_enriched	Gammaproteobacteria
B19_NODE_2389_length_27274_cov_12.658070	0	0.000178758	0	UG_enriched	Verrucomicrobiae
B19_NODE_238_length_62903_cov_56.015195	0	0.0004603	0	UG_enriched	Verrucomicrobiae
B19_NODE_2391_length_27254_cov_11.686827	0	6.7893e-05	0	UG_enriched	Acidobacteriia
B19_NODE_2395_length_27232_cov_12.676565	0	0.000117166	0	UG_enriched	Betaproteobacteria
B19_NODE_2396_length_27191_cov_6.455705	0	3.83874e-05	0	UG_enriched	Gammaproteobacteria
B19_NODE_2397_length_27171_cov_25.622548	0	0.000204283	0	UG_enriched	Gammaproteobacteria
B19_NODE_2398_length_27156_cov_32.295303	0	0.000204414	0	UG_enriched	Acidobacteriia
B19_NODE_239_length_62854_cov_39.163347	0	0.000612763	0	UG_enriched	NAmissing
B19_NODE_23_length_102362_cov_55.416110	0	0.000503702	0	UG_enriched	Alphaproteobacteria
B19_NODE_2400_length_27134_cov_11.505632	0	9.52006e-05	0	UG_enriched	Gammaproteobacteria
B19_NODE_2401_length_27117_cov_17.905846	0	0.000140425	0	UG_enriched	Betaproteobacteria
B19_NODE_2402_length_27109_cov_14.899165	0	0.000114795	0	UG_enriched	Actinobacteria
B19_NODE_2404_length_27084_cov_31.935662	0	0.000890138	0	UG_enriched	Alphaproteobacteria
B19_NODE_2405_length_27079_cov_24.969065	0	0.000157126	0	UG_enriched	NAmissing
B19_NODE_2406_length_27071_cov_9.317775	0	5.26411e-05	0	UG_enriched	Gammaproteobacteria
B19_NODE_2409_length_27024_cov_9.285810	0	5.72472e-05	0	UG_enriched	Deltaproteobacteria
B19_NODE_2410_length_26969_cov_16.144906	0	0.000100968	0	UG_enriched	Deltaproteobacteria
B19_NODE_2411_length_26955_cov_33.462193	0	0.000196258	0	UG_enriched	Acidobacteriia
B19_NODE_2412_length_26946_cov_46.403704	0	0.000281528	0	UG_enriched	NAmissing
B19_NODE_2413_length_26928_cov_50.645629	0	0.000307644	0	UG_enriched	Alphaproteobacteria
B19_NODE_2414_length_26914_cov_19.448751	0	0.000150794	0	UG_enriched	Acidobacteriia
B19_NODE_2416_length_26889_cov_27.745658	0	0.000176889	0	UG_enriched	Acidobacteriia
B19_NODE_2417_length_26881_cov_19.386416	0	0.000115545	0	UG_enriched	Gammaproteobacteria
B19_NODE_2418_length_26868_cov_23.508559	0	0.000169763	0	UG_enriched	Verrucomicrobiae
B19_NODE_2419_length_26868_cov_18.984411	0	0.000274174	0	UG_enriched	Actinobacteria
B19_NODE_241_length_62756_cov_49.114081	0	0.00029944	0	UG_enriched	Bacilli
B19_NODE_2422_length_26858_cov_15.428198	0	0.000256062	0	UG_enriched	Planctomycetia
B19_NODE_2423_length_26847_cov_9.636347	0	6.21058e-05	0	UG_enriched	Betaproteobacteria
B19_NODE_2424_length_26843_cov_10.624421	0	6.71651e-05	0	UG_enriched	Deltaproteobacteria
B19_NODE_2426_length_26829_cov_11.139053	0	6.44212e-05	0	UG_enriched	Fimbriimonadia
B19_NODE_2427_length_26824_cov_15.260787	0	0.000887892	0	UG_enriched	Alphaproteobacteria
B19_NODE_242_length_62719_cov_16.787406	0	0.000127553	0	UG_enriched	Chloroflexia
B19_NODE_2430_length_26797_cov_15.086979	0	9.06135e-05	0	UG_enriched	Actinobacteria
B19_NODE_2432_length_26775_cov_11.572455	0	6.97405e-05	0.000123446	UG_enriched	Thermoprotei
B19_NODE_2433_length_26772_cov_117.240746	0	0.000757541	0	UG_enriched	Acidobacteriia
B19_NODE_2435_length_26762_cov_52.634553	0	0.000402925	0	UG_enriched	NAmissing
B19_NODE_2436_length_26745_cov_36.754140	7.21037e-05	0.000296455	0	FO_enriched	NAmissing
B19_NODE_2437_length_26743_cov_15.395946	0	0.000188255	0	UG_enriched	Acidobacteriia
B19_NODE_2438_length_26730_cov_12.260019	0	9.6605e-05	0	UG_enriched	Acidobacteriia
B19_NODE_243_length_62677_cov_19.145364	0	0.000198402	0	UG_enriched	Actinobacteria
B19_NODE_2441_length_26648_cov_9.073027	0	5.34767e-05	0	UG_enriched	Gammaproteobacteria
B19_NODE_2445_length_26590_cov_24.870247	0	0.000160206	0	UG_enriched	Clostridia
B19_NODE_2446_length_26576_cov_18.810942	0	0.000480587	0	UG_enriched	Vicinamibacteria
B19_NODE_2447_length_26575_cov_13.164857	0	7.87456e-05	0	UG_enriched	Vicinamibacteria
B19_NODE_2449_length_26541_cov_15.709394	0	9.67865e-05	0	UG_enriched	Epsilonproteobacteria
B19_NODE_244_length_62672_cov_12.904770	0	0.000121472	0	UG_enriched	Acidobacteriia
B19_NODE_2451_length_26511_cov_17.925688	0	0.00011377	0	UG_enriched	Gammaproteobacteria
B19_NODE_2452_length_26504_cov_10.877954	0	6.51472e-05	0	UG_enriched	Planctomycetia
B19_NODE_2454_length_26495_cov_10.909909	0	0.000342716	0	UG_enriched	Actinobacteria
B19_NODE_2455_length_26492_cov_14.366153	0	8.16787e-05	0	UG_enriched	NAmissing
B19_NODE_2456_length_26461_cov_11.481860	0	0.000148611	0	UG_enriched	NAmissing
B19_NODE_245_length_62649_cov_28.454309	0	0.000162985	0	UG_enriched	Gammaproteobacteria
B19_NODE_2461_length_26390_cov_35.287906	0	0.000221905	0	UG_enriched	Actinobacteria
B19_NODE_2463_length_26359_cov_13.840481	0	0.000173619	0	UG_enriched	Betaproteobacteria
B19_NODE_2466_length_26335_cov_15.049467	0	9.27822e-05	0.00121946	UG_enriched	Betaproteobacteria
B19_NODE_2467_length_26329_cov_20.707506	0	0.000156008	0	UG_enriched	Deltaproteobacteria
B19_NODE_2468_length_26324_cov_11.740264	0	7.35101e-05	0	UG_enriched	Betaproteobacteria
B19_NODE_2469_length_26320_cov_29.771521	0	0.000264598	0	UG_enriched	Betaproteobacteria
B19_NODE_246_length_62470_cov_15.223744	0	9.00261e-05	0	UG_enriched	Bacteroidia
B19_NODE_2470_length_26295_cov_25.158803	0	0.000233761	0	UG_enriched	Vicinamibacteria
B19_NODE_2471_length_26289_cov_12.124190	0	0.000178913	0	UG_enriched	Acidobacteriia
B19_NODE_2473_length_26267_cov_13.350298	0	8.01851e-05	0	UG_enriched	Actinobacteria
B19_NODE_2474_length_26239_cov_15.121295	0	0.000136729	0	UG_enriched	Alphaproteobacteria
B19_NODE_2475_length_26224_cov_9.868509	0	5.41474e-05	0	UG_enriched	Cytophagia
B19_NODE_2476_length_26214_cov_16.675676	0	0.000106914	0	UG_enriched	Gammaproteobacteria
B19_NODE_2477_length_26206_cov_46.096287	0	0.000423047	0	UG_enriched	Acidobacteriia
B19_NODE_2478_length_26193_cov_278.379333	0	0.00204633	0.00438011	AG_enriched	Clostridia
B19_NODE_247_length_62465_cov_17.935523	0	0.00024732	0	UG_enriched	Bacilli
B19_NODE_2482_length_26115_cov_8.895318	0	0.00012061	0	UG_enriched	Gammaproteobacteria
B19_NODE_2483_length_26112_cov_15.617109	0	8.93566e-05	0	UG_enriched	Alphaproteobacteria
B19_NODE_2486_length_26080_cov_20.403958	0	0.000117404	0	UG_enriched	Gammaproteobacteria
B19_NODE_2487_length_26068_cov_11.538808	0	6.12317e-05	0	UG_enriched	Flavobacteriia
B19_NODE_2488_length_26067_cov_26.635937	0	0.000285765	0	UG_enriched	Verrucomicrobiae
B19_NODE_2489_length_26040_cov_71.365519	0	0.000424137	0.00128888	AG_enriched	Deltaproteobacteria
B19_NODE_248_length_62367_cov_49.541084_fragment_1	0	0.000304273	0	UG_enriched	Spirochaetia
B19_NODE_2492_length_26004_cov_9.290339	0	5.74075e-05	0	UG_enriched	Chitinophagia
B19_NODE_2493_length_25975_cov_11.895602	0	9.84097e-05	0	UG_enriched	Planctomycetia
B19_NODE_2494_length_25967_cov_10.672507	0	0.000143129	0	UG_enriched	Gammaproteobacteria
B19_NODE_2495_length_25963_cov_9.537788	0	5.99129e-05	0	UG_enriched	Deltaproteobacteria
B19_NODE_2496_length_25953_cov_9.965750	0	5.80426e-05	0	UG_enriched	Deltaproteobacteria
B19_NODE_2497_length_25949_cov_11.016606	0	0.000121658	0	UG_enriched	Thermoleophilia
B19_NODE_2499_length_25912_cov_25.605909	0	0.00039898	0	UG_enriched	Betaproteobacteria
B19_NODE_249_length_62244_cov_37.908135	0	0.000220724	0	UG_enriched	Actinobacteria
B19_NODE_2500_length_25902_cov_52.471854	0	0.00031669	0	UG_enriched	Clostridia
B19_NODE_2502_length_25891_cov_28.115459	0	0.000164924	0	UG_enriched	Deltaproteobacteria
B19_NODE_2503_length_25890_cov_11.990826	0	7.46115e-05	0	UG_enriched	NAmissing
B19_NODE_2504_length_25874_cov_16.266006	0	9.69894e-05	0	UG_enriched	Deltaproteobacteria
B19_NODE_2505_length_25871_cov_25.681128	0	0.00086771	0	UG_enriched	Actinobacteria
B19_NODE_2506_length_25847_cov_13.330413	0	0.000108305	0	UG_enriched	Betaproteobacteria
B19_NODE_2508_length_25823_cov_9.085726	0	0.000137364	0	UG_enriched	Deltaproteobacteria
B19_NODE_250_length_62196_cov_14.217409	0	8.44563e-05	0	UG_enriched	Acidobacteriia
B19_NODE_2512_length_25801_cov_6.695603	0	4.01271e-05	0	UG_enriched	Gammaproteobacteria
B19_NODE_2513_length_25800_cov_28.824393	0	0.000171154	0	UG_enriched	Vicinamibacteria
B19_NODE_2514_length_25793_cov_17.097171_fragment_1	0	0.000107362	0	UG_enriched	Betaproteobacteria
B19_NODE_2515_length_25789_cov_15.174905	0	9.12642e-05	0	UG_enriched	Actinobacteria
B19_NODE_2516_length_25786_cov_29.717267	0	0.000172758	0	UG_enriched	Gammaproteobacteria
B19_NODE_2517_length_25757_cov_28.916971	0	0.000205901	0	UG_enriched	Actinobacteria
B19_NODE_2518_length_25753_cov_13.240602	0	7.67191e-05	0	UG_enriched	Betaproteobacteria
B19_NODE_2519_length_25741_cov_23.181344	0	0.000131852	0	UG_enriched	Betaproteobacteria
B19_NODE_251_length_62048_cov_16.598116	0	9.79572e-05	0	UG_enriched	Alphaproteobacteria
B19_NODE_2520_length_25738_cov_8.494140	0	5.05614e-05	0	UG_enriched	Bacilli
B19_NODE_2521_length_25711_cov_9.974743	0	5.8589e-05	0	UG_enriched	Bacilli
B19_NODE_2522_length_25710_cov_93.628221	0	0.000540832	0	UG_enriched	Alphaproteobacteria
B19_NODE_2525_length_25661_cov_10.055534	0	6.39857e-05	0	UG_enriched	Deltaproteobacteria
B19_NODE_2526_length_25647_cov_8.855267	0	5.89334e-05	0	UG_enriched	Planctomycetia
B19_NODE_2527_length_25642_cov_70.721265	0	0.000428209	0	UG_enriched	Planctomycetia
B19_NODE_2530_length_25605_cov_11.420039	0	0.000125891	0	UG_enriched	Actinobacteria
B19_NODE_2531_length_25602_cov_15.860023	0	9.82184e-05	0	UG_enriched	Betaproteobacteria
B19_NODE_2532_length_25601_cov_19.957019	9.22832e-05	0.000131845	0	FO_enriched	Betaproteobacteria
B19_NODE_2536_length_25541_cov_10.049164	0	6.85987e-05	0	UG_enriched	Clostridia
B19_NODE_253_length_61948_cov_27.683631	0	0.000284717	0	UG_enriched	Deltaproteobacteria
B19_NODE_2540_length_25493_cov_43.750665	0	0.000557811	0	UG_enriched	Betaproteobacteria
B19_NODE_2541_length_25490_cov_9.276823	0	5.88975e-05	0	UG_enriched	Clostridia
B19_NODE_2542_length_25483_cov_10.483404	0	0.000128876	0	UG_enriched	Betaproteobacteria
B19_NODE_2544_length_25466_cov_13.242139	0	8.61007e-05	0	UG_enriched	Betaproteobacteria
B19_NODE_2545_length_25465_cov_11.508028	0	9.14425e-05	0	UG_enriched	Betaproteobacteria
B19_NODE_2546_length_25452_cov_66.671933	0	0.00135589	0	UG_enriched	Acidobacteriia
B19_NODE_2548_length_25444_cov_13.886289	0	0.000130727	0	UG_enriched	Alphaproteobacteria
B19_NODE_2549_length_25443_cov_17.166496	0	0.000524166	0	UG_enriched	NAmissing
B19_NODE_254_length_61936_cov_55.523392	0	0.000326002	0	UG_enriched	Betaproteobacteria
B19_NODE_2551_length_25438_cov_23.793957	0	0.00014568	0	UG_enriched	NAmissing
B19_NODE_2552_length_25431_cov_9.142418	0	5.57026e-05	0	UG_enriched	Betaproteobacteria
B19_NODE_2553_length_25430_cov_10.307744	0	6.33009e-05	0	UG_enriched	Acidobacteriia
B19_NODE_2554_length_25429_cov_243.515449	0	0.00195515	0	UG_enriched	Actinobacteria
B19_NODE_2555_length_25396_cov_9.326230	0	8.80958e-05	0	UG_enriched	Nitrospira
B19_NODE_2556_length_25392_cov_11.342227	8.28837e-05	0.000108172	0	FO_enriched	Gammaproteobacteria
B19_NODE_2557_length_25386_cov_13.507244	0	8.26341e-05	0	UG_enriched	Gammaproteobacteria
B19_NODE_2558_length_25381_cov_18.093975	0	0.000116832	0	UG_enriched	Gammaproteobacteria
B19_NODE_2559_length_25377_cov_46.131269	0	0.00029111	0	UG_enriched	Actinobacteria
B19_NODE_255_length_61835_cov_16.848478	0	0.000131472	0	UG_enriched	Actinobacteria
B19_NODE_2560_length_25377_cov_12.878959	0	9.92155e-05	0	UG_enriched	Deltaproteobacteria
B19_NODE_2561_length_25373_cov_11.892567	0	9.75682e-05	0	UG_enriched	NAmissing
B19_NODE_2563_length_25369_cov_13.953030	0	9.67159e-05	0	UG_enriched	Thermoleophilia
B19_NODE_2565_length_25347_cov_34.323462	0	0.000257425	0	UG_enriched	Deltaproteobacteria
B19_NODE_2566_length_25331_cov_14.261869	0	9.85475e-05	0	UG_enriched	Actinobacteria
B19_NODE_2567_length_25306_cov_9.131282	0	0.000109515	0	UG_enriched	Planctomycetia
B19_NODE_2568_length_25297_cov_10.637905	0	9.27663e-05	0	UG_enriched	Alphaproteobacteria
B19_NODE_2569_length_25297_cov_10.503169	0	6.18922e-05	0	UG_enriched	Clostridia
B19_NODE_256_length_61793_cov_51.136933	0	0.000383931	0	UG_enriched	Alphaproteobacteria
B19_NODE_2573_length_25248_cov_14.653197	0	8.11395e-05	0	UG_enriched	Gammaproteobacteria
B19_NODE_2574_length_25246_cov_7.509626	0	4.60431e-05	0	UG_enriched	Sphingobacteriia
B19_NODE_2575_length_25240_cov_30.108080	0	0.000524194	0	UG_enriched	Alphaproteobacteria
B19_NODE_2576_length_25216_cov_9.879496	0	5.79919e-05	0	UG_enriched	Clostridia
B19_NODE_2578_length_25196_cov_12.105883	0	9.4071e-05	0	UG_enriched	Betaproteobacteria
B19_NODE_2579_length_25183_cov_12.389884	8.26971e-05	7.81865e-05	0	FO_enriched	Gammaproteobacteria
B19_NODE_2583_length_25145_cov_13.057314	0	0.000102238	0	UG_enriched	Deltaproteobacteria
B19_NODE_2584_length_25144_cov_40.170354	0	0.000230678	0	UG_enriched	Actinobacteria
B19_NODE_2585_length_25119_cov_13.374362	0	0.000224137	0	UG_enriched	Acidobacteriia
B19_NODE_2587_length_25113_cov_15.012850	0	0.000172341	0	UG_enriched	Gammaproteobacteria
B19_NODE_2588_length_25110_cov_10.102135	0	6.13409e-05	0	UG_enriched	Betaproteobacteria
B19_NODE_2589_length_25108_cov_21.232866	0	0.000305422	0.000928234	AG_enriched	Acidimicrobiia
B19_NODE_2590_length_25092_cov_40.938771	0	0.000238111	0	UG_enriched	Gammaproteobacteria
B19_NODE_2591_length_25087_cov_8.397451	0	4.70103e-05	0	UG_enriched	Flavobacteriia
B19_NODE_2592_length_25073_cov_10.508674	0	6.49456e-05	0	UG_enriched	Deltaproteobacteria
B19_NODE_2593_length_25072_cov_11.271136	0	6.70433e-05	0	UG_enriched	Alphaproteobacteria
B19_NODE_2595_length_25066_cov_9.281396	0	5.58377e-05	0	UG_enriched	Bacilli
B19_NODE_2597_length_25046_cov_13.991077	0	0.000111501	0	UG_enriched	Alphaproteobacteria
B19_NODE_2599_length_25039_cov_43.098943	0	0.000259729	0	UG_enriched	Gammaproteobacteria
B19_NODE_259_length_61609_cov_76.894093	0	0.00104643	0	UG_enriched	Alphaproteobacteria
B19_NODE_25_length_101697_cov_12.102005	0	7.33957e-05	0	UG_enriched	Flavobacteriia
B19_NODE_2600_length_25016_cov_37.110092	0	0.000229826	0	UG_enriched	Cytophagia
B19_NODE_2601_length_24973_cov_17.998796	0	0.000114873	0	UG_enriched	Actinobacteria
B19_NODE_2602_length_24968_cov_24.187091	0	0.000140549	0	UG_enriched	NAmissing
B19_NODE_2604_length_24959_cov_13.031682	0	0.000104495	0	UG_enriched	Actinobacteria
B19_NODE_2607_length_24949_cov_11.736523	0	6.46572e-05	0	UG_enriched	Acidobacteriia
B19_NODE_2608_length_24947_cov_9.481118	0	5.32513e-05	0	UG_enriched	Gammaproteobacteria
B19_NODE_2609_length_24942_cov_9.747820	0	6.25014e-05	0	UG_enriched	Clostridia
B19_NODE_260_length_61583_cov_17.850442	0	0.000240598	0	UG_enriched	Gammaproteobacteria
B19_NODE_2610_length_24929_cov_9.760875	0	6.01549e-05	0	UG_enriched	Gammaproteobacteria
B19_NODE_2615_length_24872_cov_21.339364	0	0.00015657	0	UG_enriched	Planctomycetia
B19_NODE_2616_length_24846_cov_37.758461	0	0.000781453	0	UG_enriched	Actinobacteria
B19_NODE_2618_length_24823_cov_10.223312	0	0.000199415	0	UG_enriched	Actinobacteria
B19_NODE_261_length_61571_cov_15.281130	0	0.000122205	0	UG_enriched	Acidobacteriia
B19_NODE_2625_length_24786_cov_12.216611	0	0.000116733	0	UG_enriched	Alphaproteobacteria
B19_NODE_2626_length_24783_cov_22.695972	0	0.000164616	0	UG_enriched	Gammaproteobacteria
B19_NODE_2627_length_24754_cov_11.960930	0	6.98213e-05	0	UG_enriched	Actinobacteria
B19_NODE_2628_length_24735_cov_108.319895	0	0.00182832	0	UG_enriched	Acidobacteriia
B19_NODE_2629_length_24727_cov_11.741083	0	0.000117766	0	UG_enriched	Verrucomicrobiae
B19_NODE_2630_length_24693_cov_19.458398	0	0.000120019	0	UG_enriched	Gammaproteobacteria
B19_NODE_2632_length_24691_cov_12.461560	0	0.000198776	0	UG_enriched	Betaproteobacteria
B19_NODE_2634_length_24685_cov_12.431912	0	0.000115002	0	UG_enriched	Gammaproteobacteria
B19_NODE_2636_length_24676_cov_15.199667	0	9.02305e-05	0	UG_enriched	Cytophagia
B19_NODE_2637_length_24673_cov_33.906451	0	0.000425681	0	UG_enriched	Acidobacteriia
B19_NODE_263_length_61337_cov_60.253419	0.000121056	0.000515077	0	UG_enriched	Ktedonobacteria
B19_NODE_2641_length_24643_cov_19.863592	0	0.000122394	0	UG_enriched	Bacilli
B19_NODE_2642_length_24642_cov_10.775206	0	6.51877e-05	0	UG_enriched	Bacilli
B19_NODE_2643_length_24641_cov_16.879078	0	9.67539e-05	0	UG_enriched	Negativicutes
B19_NODE_2645_length_24629_cov_14.543501	0	8.55179e-05	0	UG_enriched	Verrucomicrobiae
B19_NODE_2647_length_24606_cov_27.631339	0	0.000159558	0	UG_enriched	Betaproteobacteria
B19_NODE_2650_length_24582_cov_28.748481	0	0.000741997	0	UG_enriched	Alphaproteobacteria
B19_NODE_2654_length_24546_cov_17.435956	0	0.00011128	0	UG_enriched	Verrucomicrobiae
B19_NODE_2655_length_24522_cov_9.057179	0	0.000105053	0	UG_enriched	Gammaproteobacteria
B19_NODE_2658_length_24491_cov_16.612334	0	0.000134984	0	UG_enriched	Acidobacteriia
B19_NODE_2659_length_24477_cov_11.695561	0	7.12344e-05	0	UG_enriched	Thermoleophilia
B19_NODE_265_length_60966_cov_12.182496	0	6.99843e-05	0	UG_enriched	Deltaproteobacteria
B19_NODE_2660_length_24472_cov_22.673383	0	0.000135712	0	UG_enriched	Cytophagia
B19_NODE_2661_length_24471_cov_11.870167	0	0.000101446	0	UG_enriched	Flavobacteriia
B19_NODE_2662_length_24467_cov_45.489186	0	0.000271203	0	UG_enriched	NAmissing
B19_NODE_2663_length_24456_cov_9.204869	0	5.88241e-05	0	UG_enriched	Clostridia
B19_NODE_2664_length_24447_cov_11.742129	0	0.000108802	0	UG_enriched	Armatimonadia
B19_NODE_266_length_60957_cov_19.059982	0	0.000213634	0	UG_enriched	Acidimicrobiia
B19_NODE_2673_length_24309_cov_9.775047	6.09528e-05	5.69492e-05	0	FO_enriched	Bacilli
B19_NODE_2674_length_24300_cov_12.851763	0	9.81117e-05	0	UG_enriched	Betaproteobacteria
B19_NODE_2677_length_24216_cov_11.686271	0	7.65505e-05	0	UG_enriched	Alphaproteobacteria
B19_NODE_2678_length_24215_cov_8.242012	0	4.90531e-05	0	UG_enriched	Actinobacteria
B19_NODE_2679_length_24198_cov_10.050077	0	6.1482e-05	0	UG_enriched	Verrucomicrobiae
B19_NODE_267_length_60918_cov_197.302072	0	0.00115326	0	UG_enriched	Alphaproteobacteria
B19_NODE_2684_length_24158_cov_12.244866	0	7.09827e-05	0	UG_enriched	Gammaproteobacteria
B19_NODE_2687_length_24135_cov_24.134427	0	0.000238845	0	UG_enriched	Alphaproteobacteria
B19_NODE_2688_length_24135_cov_21.212708	0	0.00012834	0	UG_enriched	Planctomycetia
B19_NODE_268_length_60918_cov_24.134400	0	0.000144112	0	UG_enriched	Actinobacteria
B19_NODE_2694_length_24113_cov_10.680896	0	6.57745e-05	0	UG_enriched	NAmissing
B19_NODE_2695_length_24089_cov_14.028709	0	0.000502336	0	UG_enriched	Acidobacteriia
B19_NODE_2698_length_24050_cov_43.785872	0	0.000285981	0	UG_enriched	Opitutae
B19_NODE_269_length_60900_cov_46.296130	5.82215e-05	0.00120859	0	FO_enriched	Actinobacteria
B19_NODE_26_length_101198_cov_14.719140	0	0.000200863	0	UG_enriched	Fimbriimonadia
B19_NODE_2700_length_24025_cov_25.969754	0	0.000159326	0	UG_enriched	Caldilineae
B19_NODE_2703_length_24004_cov_19.458349	0	0.000117887	0	UG_enriched	Acidobacteriia
B19_NODE_2707_length_23955_cov_31.496151	0	0.00019339	0	UG_enriched	Sphingobacteriia
B19_NODE_2708_length_23953_cov_12.550548	0	7.11657e-05	0	UG_enriched	NAmissing
B19_NODE_270_length_60835_cov_36.585686	0	0.000216784	0	UG_enriched	Actinobacteria
B19_NODE_2710_length_23938_cov_12.356739	0	8.1899e-05	0	UG_enriched	Verrucomicrobiae
B19_NODE_2711_length_23918_cov_9.863093	0	5.90846e-05	0	UG_enriched	Alphaproteobacteria
B19_NODE_2712_length_23917_cov_32.879935	0	0.000327963	0	UG_enriched	Alphaproteobacteria
B19_NODE_2715_length_23856_cov_14.165413	0	8.73656e-05	0	UG_enriched	Gammaproteobacteria
B19_NODE_2718_length_23783_cov_30.053565	0	0.000287581	0	UG_enriched	Betaproteobacteria
B19_NODE_271_length_60767_cov_14.294950	0	0.000200254	0	UG_enriched	Alphaproteobacteria
B19_NODE_2720_length_23774_cov_12.695813	0	0.000310196	0	UG_enriched	Alphaproteobacteria
B19_NODE_2721_length_23769_cov_12.526440	0	0.000152582	0	UG_enriched	Alphaproteobacteria
B19_NODE_2722_length_23768_cov_46.455151	0	0.000290087	0	UG_enriched	Betaproteobacteria
B19_NODE_2723_length_23765_cov_7.592408	0	4.73438e-05	0	UG_enriched	Bacilli
B19_NODE_2724_length_23758_cov_10.900181	0	6.74705e-05	0	UG_enriched	Bacteroidia
B19_NODE_2726_length_23744_cov_9.243911	0	5.55212e-05	0	UG_enriched	Acidobacteriia
B19_NODE_2727_length_23735_cov_9.753421	0	5.91118e-05	0	UG_enriched	Cytophagia
B19_NODE_2729_length_23714_cov_8.919227	0	0.000125309	0	UG_enriched	Gammaproteobacteria
B19_NODE_272_length_60734_cov_28.846982	0	0.000174374	0	UG_enriched	Betaproteobacteria
B19_NODE_2731_length_23659_cov_10.706321	0	6.62488e-05	0	UG_enriched	NAmissing
B19_NODE_2732_length_23637_cov_10.766262	0	9.16747e-05	0	UG_enriched	NAmissing
B19_NODE_2734_length_23622_cov_9.582976	0	5.36559e-05	0	UG_enriched	Betaproteobacteria
B19_NODE_2735_length_23617_cov_21.642984	0	0.000145935	0	UG_enriched	Tissierellia
B19_NODE_2736_length_23614_cov_10.649858	0	5.82666e-05	0	UG_enriched	Gammaproteobacteria
B19_NODE_2737_length_23612_cov_11.198370	0	0.000122711	0	UG_enriched	Clostridia
B19_NODE_2739_length_23594_cov_27.747950	0	0.000226743	0	UG_enriched	Actinobacteria
B19_NODE_273_length_60466_cov_11.482727	0	0.000105543	0	UG_enriched	Deltaproteobacteria
B19_NODE_2742_length_23563_cov_15.722052	0	0.00011983	0	UG_enriched	Deltaproteobacteria
B19_NODE_2746_length_23504_cov_12.605143	0	0.000152333	0	UG_enriched	Bacilli
B19_NODE_2747_length_23503_cov_253.894618	0	0.0015872	0	UG_enriched	Deltaproteobacteria
B19_NODE_2748_length_23503_cov_10.447501	0	6.21465e-05	0	UG_enriched	Bacilli
B19_NODE_2749_length_23499_cov_10.700350	0	0.000109829	0	UG_enriched	Alphaproteobacteria
B19_NODE_274_length_60429_cov_20.520920	0	0.000121304	0	UG_enriched	NAmissing
B19_NODE_2751_length_23485_cov_12.431114	0	0.000103377	0	UG_enriched	Acidobacteriia
B19_NODE_2752_length_23478_cov_9.416044	0	4.73452e-05	0	UG_enriched	Actinobacteria
B19_NODE_2753_length_23458_cov_10.915951	0	6.43605e-05	0	UG_enriched	Alphaproteobacteria
B19_NODE_2754_length_23436_cov_27.636714	0	0.000215725	0	UG_enriched	Alphaproteobacteria
B19_NODE_2755_length_23432_cov_67.424391	0	0.000689081	0	UG_enriched	Ktedonobacteria
B19_NODE_2757_length_23431_cov_11.444815	0	7.21003e-05	0	UG_enriched	Deltaproteobacteria
B19_NODE_2758_length_23429_cov_12.173654	0	0.000116077	0	UG_enriched	Gammaproteobacteria
B19_NODE_275_length_60412_cov_10.854234	0	6.5914e-05	0	UG_enriched	Planctomycetia
B19_NODE_2766_length_23300_cov_9.135384	0	5.94154e-05	0	UG_enriched	Actinobacteria
B19_NODE_2767_length_23298_cov_15.377619	0	9.00399e-05	0	UG_enriched	Actinobacteria
B19_NODE_2769_length_23242_cov_9.699702	0	5.92721e-05	0	UG_enriched	Gammaproteobacteria
B19_NODE_276_length_60356_cov_22.055969	0	0.000129115	0	UG_enriched	Acidobacteriia
B19_NODE_2770_length_23220_cov_55.208332	0	0.000316855	0	UG_enriched	NAmissing
B19_NODE_2771_length_23209_cov_26.484409	0	0.000153538	0	UG_enriched	Acidobacteriia
B19_NODE_2772_length_23202_cov_10.216097	0	6.04697e-05	0	UG_enriched	Acidobacteriia
B19_NODE_2773_length_23180_cov_11.752259	0	7.07611e-05	0	UG_enriched	Vicinamibacteria
B19_NODE_2776_length_23167_cov_423.668441	0	0.00240708	0	UG_enriched	Bacilli
B19_NODE_2778_length_23161_cov_31.882022	0	0.000297889	0	UG_enriched	Deltaproteobacteria
B19_NODE_2780_length_23152_cov_15.348990	0	9.42671e-05	0	UG_enriched	Bacilli
B19_NODE_2781_length_23140_cov_14.077843	0	0.000186853	0	UG_enriched	Alphaproteobacteria
B19_NODE_2782_length_23123_cov_15.799853	0	9.49716e-05	0	UG_enriched	Ktedonobacteria
B19_NODE_2783_length_23123_cov_10.778698	0	0.000131174	0	UG_enriched	Alphaproteobacteria
B19_NODE_2785_length_23110_cov_44.488831	6.09724e-05	0.00122066	0	FO_enriched	Alphaproteobacteria
B19_NODE_2788_length_23077_cov_12.423465	0	7.88602e-05	0	UG_enriched	Acidobacteriia
B19_NODE_2789_length_23076_cov_10.185787	0	6.12404e-05	0	UG_enriched	Deltaproteobacteria
B19_NODE_278_length_60252_cov_38.140356	0	0.000222509	0	UG_enriched	Actinobacteria
B19_NODE_2791_length_23064_cov_30.559172	0	0.000182054	0	UG_enriched	Gammaproteobacteria
B19_NODE_2792_length_23042_cov_46.578501	0	0.00029077	0	UG_enriched	Betaproteobacteria
B19_NODE_2793_length_23040_cov_11.704416	0	9.36276e-05	0	UG_enriched	Deltaproteobacteria
B19_NODE_2794_length_23006_cov_10.925929	0	6.42256e-05	0	UG_enriched	Bacteroidia
B19_NODE_2796_length_22999_cov_19.231477	0	9.73474e-05	0	UG_enriched	Deltaproteobacteria
B19_NODE_2798_length_22981_cov_14.266204	0	0.000288021	0	UG_enriched	Betaproteobacteria
B19_NODE_27_length_99318_cov_37.806474	0	0.000253033	0	UG_enriched	Acidobacteriia
B19_NODE_2801_length_22973_cov_11.446941	0	0.00018076	0	UG_enriched	Ktedonobacteria
B19_NODE_2802_length_22972_cov_9.767291	0	5.85672e-05	0	UG_enriched	Bacilli
B19_NODE_2805_length_22954_cov_9.543648	0	5.72844e-05	0	UG_enriched	Clostridia
B19_NODE_2807_length_22944_cov_15.985277	0	0.000103836	0	UG_enriched	Thermoleophilia
B19_NODE_280_length_60195_cov_71.933106	0	0.000423455	0	UG_enriched	Alphaproteobacteria
B19_NODE_2812_length_22912_cov_11.789999	0	7.31419e-05	5.32226e-05	UG_enriched	Alphaproteobacteria
B19_NODE_2813_length_22909_cov_10.879802	0	7.16722e-05	0	UG_enriched	Alphaproteobacteria
B19_NODE_2815_length_22905_cov_27.496805	0	0.00102595	0	UG_enriched	Betaproteobacteria
B19_NODE_2818_length_22870_cov_8.812492	0	5.18638e-05	0	UG_enriched	Alphaproteobacteria
B19_NODE_281_length_60126_cov_13.023206	0	7.71903e-05	0	UG_enriched	Acidobacteriia
B19_NODE_2820_length_22864_cov_19.280240	0	0.000139719	0	UG_enriched	Actinobacteria
B19_NODE_2821_length_22856_cov_14.378668	0	0.000111395	0	UG_enriched	Actinobacteria
B19_NODE_2825_length_22827_cov_8.556297	0	5.53019e-05	0	UG_enriched	Spirochaetia
B19_NODE_2826_length_22826_cov_18.704932	0	0.000190564	0	UG_enriched	Gammaproteobacteria
B19_NODE_2827_length_22817_cov_8.884764	0	4.91623e-05	0	UG_enriched	Verrucomicrobiae
B19_NODE_2829_length_22801_cov_16.300932	0	9.09621e-05	0	UG_enriched	NAmissing
B19_NODE_282_length_60063_cov_13.445157	0	7.92178e-05	0	UG_enriched	Bacilli
B19_NODE_2831_length_22765_cov_10.535579	0	6.18538e-05	0	UG_enriched	Alphaproteobacteria
B19_NODE_2832_length_22750_cov_12.803701	0	7.38117e-05	0	UG_enriched	Acidobacteriia
B19_NODE_2834_length_22730_cov_37.834179	0	0.000672076	0	UG_enriched	NAmissing
B19_NODE_2835_length_22721_cov_205.341878	0	0.000936405	0	UG_enriched	Actinobacteria
B19_NODE_2838_length_22698_cov_10.001634	0	8.89203e-05	6.26365e-05	UG_enriched	Deltaproteobacteria
B19_NODE_2839_length_22690_cov_9.960725	0	0.00017461	0	UG_enriched	Betaproteobacteria
B19_NODE_283_length_59930_cov_15.505052	0	0.000253758	0	UG_enriched	Actinobacteria
B19_NODE_2841_length_22684_cov_9.714393	0	6.02819e-05	0	UG_enriched	Betaproteobacteria
B19_NODE_2843_length_22680_cov_10.274519	0	0.000148486	0	UG_enriched	Acidobacteriia
B19_NODE_2844_length_22678_cov_26.897405	0	0.000214906	0	UG_enriched	Alphaproteobacteria
B19_NODE_2845_length_22666_cov_27.445801	0	0.000159384	0	UG_enriched	Actinobacteria
B19_NODE_2847_length_22661_cov_7.597717	0	4.47152e-05	0	UG_enriched	Betaproteobacteria
B19_NODE_2849_length_22635_cov_8.576041	0	5.07554e-05	0	UG_enriched	Betaproteobacteria
B19_NODE_284_length_59907_cov_21.338167	0	0.000235056	0	UG_enriched	NAmissing
B19_NODE_2851_length_22617_cov_13.573043	0	7.93403e-05	0	UG_enriched	Gammaproteobacteria
B19_NODE_2853_length_22599_cov_19.029365	0	0.00011232	0	UG_enriched	Acidobacteriia
B19_NODE_2854_length_22591_cov_13.384407	0	8.19818e-05	0	UG_enriched	Actinobacteria
B19_NODE_2857_length_22558_cov_11.172155	0	6.97827e-05	0	UG_enriched	Deltaproteobacteria
B19_NODE_2859_length_22541_cov_95.229743	0	0.000626083	0	UG_enriched	Actinobacteria
B19_NODE_2862_length_22536_cov_12.290379	0	0.000106952	0	UG_enriched	NAmissing
B19_NODE_2864_length_22534_cov_9.723342	0	5.72993e-05	0	UG_enriched	Actinobacteria
B19_NODE_2866_length_22495_cov_13.989037	0	8.39136e-05	0	UG_enriched	Bacilli
B19_NODE_2868_length_22446_cov_10.413202	0	9.56841e-05	0	UG_enriched	Acidobacteriia
B19_NODE_286_length_59696_cov_319.944300	0	0.00196431	0	UG_enriched	Actinobacteria
B19_NODE_2871_length_22362_cov_8.417672_fragment_1	0	5.06693e-05	0	UG_enriched	Opitutae
B19_NODE_2872_length_22357_cov_8.862748	0	4.97949e-05	0	UG_enriched	Betaproteobacteria
B19_NODE_2874_length_22350_cov_21.260597	0	0.000174394	0	UG_enriched	Gammaproteobacteria
B19_NODE_2875_length_22340_cov_21.444245	0	0.00079424	0	UG_enriched	Thermoleophilia
B19_NODE_2876_length_22326_cov_10.919088	0	6.54987e-05	0	UG_enriched	Verrucomicrobiae
B19_NODE_2877_length_22320_cov_7.405345	0	4.52465e-05	0	UG_enriched	Sphingobacteriia
B19_NODE_287_length_59622_cov_24.887689	0	0.000145596	0	UG_enriched	Actinobacteria
B19_NODE_2880_length_22292_cov_28.418806	0	0.000171028	0	UG_enriched	Verrucomicrobiae
B19_NODE_2881_length_22286_cov_13.904368	0	0.000199801	0	UG_enriched	Actinobacteria
B19_NODE_2882_length_22283_cov_25.740687	0	0.00014433	0	UG_enriched	Clostridia
B19_NODE_2885_length_22265_cov_347.792886	0.00180358	0.00226164	0	UG_enriched	Actinobacteria
B19_NODE_2889_length_22223_cov_10.012901	0	6.29048e-05	0	UG_enriched	Actinobacteria
B19_NODE_288_length_59512_cov_39.069916	0	0.000228322	0	UG_enriched	Gammaproteobacteria
B19_NODE_2890_length_22219_cov_13.634588	0	0.000155741	0	UG_enriched	NAmissing
B19_NODE_2891_length_22203_cov_16.803820	0	0.000105775	0	UG_enriched	Betaproteobacteria
B19_NODE_2893_length_22168_cov_64.869850	0	0.000601152	0	UG_enriched	NAmissing
B19_NODE_2894_length_22162_cov_15.262406	0	0.000372798	0	UG_enriched	Clostridia
B19_NODE_2896_length_22153_cov_10.912119	0	6.20328e-05	0	UG_enriched	Gammaproteobacteria
B19_NODE_2898_length_22138_cov_12.976951	0	0.000162712	0	UG_enriched	Deltaproteobacteria
B19_NODE_289_length_59507_cov_14.573925	0	8.71337e-05	0	UG_enriched	Acidobacteriia
B19_NODE_28_length_98873_cov_69.281356	0	0.000437035	0	UG_enriched	Actinobacteria
B19_NODE_2900_length_22113_cov_12.578022	0	7.01909e-05	0	UG_enriched	Bacilli
B19_NODE_2903_length_22087_cov_17.461692	0	0.000111624	0	UG_enriched	Alphaproteobacteria
B19_NODE_2904_length_22066_cov_11.656445	0	6.84206e-05	0	UG_enriched	Nitrospira
B19_NODE_2907_length_22036_cov_148.595196	0	0.000908749	0	UG_enriched	NAmissing
B19_NODE_2908_length_22036_cov_10.966744	0	6.48228e-05	0	UG_enriched	Bacilli
B19_NODE_290_length_59472_cov_25.551559	0	0.000153058	0	UG_enriched	Gammaproteobacteria
B19_NODE_2916_length_21967_cov_10.307092	0	6.40236e-05	0	UG_enriched	Clostridia
B19_NODE_2917_length_21964_cov_10.092930	0	5.50833e-05	0	UG_enriched	Alphaproteobacteria
B19_NODE_2918_length_21954_cov_11.222156	0	6.42931e-05	0	UG_enriched	Betaproteobacteria
B19_NODE_291_length_59398_cov_360.751698	0	0.00327632	0	UG_enriched	Actinobacteria
B19_NODE_2921_length_21943_cov_14.773255	0	0.000185708	0	UG_enriched	Alphaproteobacteria
B19_NODE_2922_length_21941_cov_108.164809	4.04058e-05	0.00292457	0	FO_enriched	Acidobacteriia
B19_NODE_2923_length_21938_cov_9.060732	0	4.54937e-05	0	UG_enriched	Bacilli
B19_NODE_2926_length_21925_cov_10.498445	0	0.000101889	0	UG_enriched	Alphaproteobacteria
B19_NODE_2927_length_21920_cov_9.214544	0	8.65557e-05	0	UG_enriched	Acidobacteriia
B19_NODE_2929_length_21911_cov_43.843750	0	0.00197514	0.000552555	UG_enriched	Alphaproteobacteria
B19_NODE_292_length_59393_cov_9.712629	0	6.06542e-05	0	UG_enriched	Gammaproteobacteria
B19_NODE_2932_length_21891_cov_11.133175	0	0.000144472	0	UG_enriched	Alphaproteobacteria
B19_NODE_2934_length_21879_cov_10.213022	0	6.02539e-05	0	UG_enriched	Alphaproteobacteria
B19_NODE_2935_length_21872_cov_21.992712	0	0.000756779	0	UG_enriched	Gammaproteobacteria
B19_NODE_2937_length_21857_cov_8.928814	0	0.00012082	0	UG_enriched	Alphaproteobacteria
B19_NODE_2939_length_21853_cov_10.138728	0	8.82505e-05	0	UG_enriched	Deltaproteobacteria
B19_NODE_293_length_59311_cov_26.194461	0	0.000158073	0	UG_enriched	Planctomycetia
B19_NODE_2941_length_21841_cov_27.335353	0	0.00019345	0	UG_enriched	Alphaproteobacteria
B19_NODE_2942_length_21833_cov_19.935531	0	0.000118045	0	UG_enriched	Gammaproteobacteria
B19_NODE_2944_length_21824_cov_9.106206	0	5.33403e-05	0	UG_enriched	Bacilli
B19_NODE_2945_length_21823_cov_10.422547	0	0.00013892	0	UG_enriched	Acidobacteriia
B19_NODE_2947_length_21806_cov_37.392074	0	0.000481691	0.00173232	AG_enriched	Alphaproteobacteria
B19_NODE_2948_length_21803_cov_12.331433	0	7.66291e-05	0	UG_enriched	Actinobacteria
B19_NODE_2949_length_21787_cov_38.917587	0	0.000237134	0	UG_enriched	NAmissing
B19_NODE_294_length_59254_cov_523.696464	0	0.00423752	0	UG_enriched	Betaproteobacteria
B19_NODE_2951_length_21782_cov_11.993096	0	6.25448e-05	0	UG_enriched	Bacilli
B19_NODE_2954_length_21763_cov_10.298922	0	6.16651e-05	0	UG_enriched	Clostridia
B19_NODE_2956_length_21761_cov_20.057680	0	0.000122563	0	UG_enriched	Oligoflexia
B19_NODE_2957_length_21755_cov_10.294424	0	8.8919e-05	0	UG_enriched	Betaproteobacteria
B19_NODE_295_length_59217_cov_83.848095	0	0.00050207	0	UG_enriched	Gammaproteobacteria
B19_NODE_2960_length_21722_cov_34.088383	0	0.000271018	0	UG_enriched	Alphaproteobacteria
B19_NODE_2965_length_21690_cov_15.767922	0	0.000776573	0	UG_enriched	Spartobacteria
B19_NODE_2967_length_21674_cov_20.820436	0	0.00359515	0	UG_enriched	Acidobacteriia
B19_NODE_2968_length_21648_cov_20.459593	0	0.000270072	0	UG_enriched	Actinobacteria
B19_NODE_2969_length_21643_cov_24.570132	0	0.000158619	0	UG_enriched	Actinobacteria
B19_NODE_296_length_59090_cov_16.168544	0	9.35985e-05	0	UG_enriched	NAmissing
B19_NODE_2975_length_21570_cov_10.280734	0	6.54377e-05	0	UG_enriched	Alphaproteobacteria
B19_NODE_297_length_58999_cov_56.324104	0	0.000444542	0	UG_enriched	Vicinamibacteria
B19_NODE_2980_length_21529_cov_45.055136	0	0.000260203	0	UG_enriched	NAmissing
B19_NODE_2983_length_21491_cov_16.505738	0	0.000161593	0	UG_enriched	Alphaproteobacteria
B19_NODE_2985_length_21485_cov_235.123145	0	0.0013592	0	UG_enriched	NAmissing
B19_NODE_2988_length_21471_cov_10.001401	0	6.18724e-05	0	UG_enriched	Clostridia
B19_NODE_298_length_58817_cov_22.897604	0	0.000281594	0	UG_enriched	Actinobacteria
B19_NODE_2991_length_21449_cov_15.457698	0	0.000208226	0.000178013	UG_enriched	Planctomycetia
B19_NODE_2992_length_21447_cov_35.312640	0	0.000651112	0	UG_enriched	Acidobacteriia
B19_NODE_2993_length_21446_cov_13.039596	0	0.000248313	0	UG_enriched	Deltaproteobacteria
B19_NODE_2994_length_21446_cov_12.917208	0	8.07491e-05	0	UG_enriched	Gammaproteobacteria
B19_NODE_2996_length_21427_cov_14.080526	0	8.25604e-05	0	UG_enriched	Holophagae
B19_NODE_2998_length_21409_cov_11.506556	0	0.000114315	0	UG_enriched	Acidobacteriia
B19_NODE_2999_length_21398_cov_11.384154	0	0.000132553	0	UG_enriched	Alphaproteobacteria
B19_NODE_299_length_58812_cov_13.204912	0	0.000282289	0.000104335	UG_enriched	Actinobacteria
B19_NODE_29_length_98607_cov_26.122615	0	0.000157543	0	UG_enriched	Actinobacteria
B19_NODE_2_length_229167_cov_106.839031	0	0.000451911	0	UG_enriched	Actinobacteria
B19_NODE_3000_length_21392_cov_16.338192	0	0.000101548	0	UG_enriched	Thermoleophilia
B19_NODE_3001_length_21389_cov_9.216274	0	5.43459e-05	0	UG_enriched	Clostridia
B19_NODE_3005_length_21374_cov_10.962616	0	6.79404e-05	0	UG_enriched	Betaproteobacteria
B19_NODE_3006_length_21372_cov_16.000657	0	9.3952e-05	0	UG_enriched	NAmissing
B19_NODE_3008_length_21343_cov_102.945885	0	0.000689258	0	UG_enriched	Acidobacteriia
B19_NODE_300_length_58718_cov_19.724068	0	0.000115344	0	UG_enriched	Alphaproteobacteria
B19_NODE_3010_length_21318_cov_14.428350	0	0.000135688	0	UG_enriched	Gammaproteobacteria
B19_NODE_3012_length_21310_cov_13.092731	0	7.87199e-05	0	UG_enriched	Bacilli
B19_NODE_3014_length_21293_cov_10.711272	0	6.15938e-05	0	UG_enriched	Acidobacteriia
B19_NODE_3019_length_21233_cov_25.603976	0	0.000147636	0	UG_enriched	Alphaproteobacteria
B19_NODE_301_length_58680_cov_33.754388	0	0.000194223	0	UG_enriched	Acidobacteriia
B19_NODE_3020_length_21226_cov_10.395163	0	6.16286e-05	0	UG_enriched	Betaproteobacteria
B19_NODE_3023_length_21204_cov_14.154806	0	0.0349317	0	UG_enriched	Actinobacteria
B19_NODE_3025_length_21194_cov_18.496760	0	0.000664492	0	UG_enriched	Gammaproteobacteria
B19_NODE_3026_length_21186_cov_13.141404	0	8.77386e-05	0	UG_enriched	Gammaproteobacteria
B19_NODE_3027_length_21170_cov_10.585034	0	6.57136e-05	0	UG_enriched	Alphaproteobacteria
B19_NODE_3029_length_21128_cov_9.989940	0	5.71024e-05	0	UG_enriched	Acidobacteriia
B19_NODE_3031_length_21116_cov_10.188785	0	0.000103662	0	UG_enriched	Deltaproteobacteria
B19_NODE_3033_length_21106_cov_7.917914	0	5.23449e-05	0	UG_enriched	Bacilli
B19_NODE_3034_length_21101_cov_17.251639	0	0.000101743	0	UG_enriched	Betaproteobacteria
B19_NODE_3035_length_21095_cov_20.721721	0	0.000131814	0	UG_enriched	Bacilli
B19_NODE_3036_length_21065_cov_332.553927	0.00125186	0.00203119	0	UG_enriched	Actinobacteria
B19_NODE_303_length_58052_cov_118.854458	0	0.000692445	0	UG_enriched	Alphaproteobacteria
B19_NODE_3040_length_21043_cov_10.215409	0	5.97488e-05	0	UG_enriched	NAmissing
B19_NODE_3042_length_21039_cov_10.273828	0	7.14384e-05	0	UG_enriched	Acidobacteriia
B19_NODE_3044_length_21032_cov_7.487915	0	4.04442e-05	0	UG_enriched	Bacilli
B19_NODE_3045_length_21031_cov_10.135059	0	8.95525e-05	0	UG_enriched	Gammaproteobacteria
B19_NODE_3048_length_21017_cov_9.516077	0	5.46628e-05	0	UG_enriched	Deltaproteobacteria
B19_NODE_3049_length_21013_cov_14.592423	0	0.000181703	0	UG_enriched	Opitutae
B19_NODE_304_length_58048_cov_24.902281	0	0.000148698	0	UG_enriched	Deltaproteobacteria
B19_NODE_3050_length_21013_cov_8.600439	0	5.12864e-05	0	UG_enriched	Nitrospira
B19_NODE_3052_length_20993_cov_12.734836	0	7.28056e-05	0	UG_enriched	Actinobacteria
B19_NODE_3053_length_20989_cov_17.026225	0	0.000113427	0	UG_enriched	Actinobacteria
B19_NODE_3054_length_20980_cov_11.981888	0	6.58241e-05	0	UG_enriched	Deltaproteobacteria
B19_NODE_3055_length_20979_cov_10.943988	0	0.000128568	0	UG_enriched	Betaproteobacteria
B19_NODE_3057_length_20973_cov_16.490200	9.97472e-05	0.000100102	0	FO_enriched	Acidobacteriia
B19_NODE_3058_length_20966_cov_15.230644	0	8.51032e-05	0	UG_enriched	Bacteroidia
B19_NODE_305_length_58016_cov_15.196477	0	8.89934e-05	0	UG_enriched	Clostridia
B19_NODE_3060_length_20948_cov_27.068923	0	0.000169867	0	UG_enriched	Actinobacteria
B19_NODE_3061_length_20942_cov_17.791593	0.000209634	0.000247025	0	UG_enriched	Alphaproteobacteria
B19_NODE_3064_length_20928_cov_11.494994	0	0.000122517	0	UG_enriched	Actinobacteria
B19_NODE_3065_length_20926_cov_15.651814	0	0.000171006	0	UG_enriched	Acidobacteriia
B19_NODE_3066_length_20920_cov_11.317805	0	7.68666e-05	0	UG_enriched	Deltaproteobacteria
B19_NODE_3067_length_20908_cov_24.526255	0	0.00013899	0	UG_enriched	Acidobacteriia
B19_NODE_3068_length_20905_cov_21.539281	0	0.000411927	0	UG_enriched	Actinobacteria
B19_NODE_306_length_57983_cov_21.953632	0	0.000188114	0	UG_enriched	Thermoprotei
B19_NODE_3070_length_20896_cov_14.958399	0	9.17133e-05	0	UG_enriched	Acidobacteriia
B19_NODE_3074_length_20878_cov_49.777698	0	0.000379735	0	UG_enriched	Alphaproteobacteria
B19_NODE_3075_length_20874_cov_9.809117	0	0.000111667	0	UG_enriched	Gammaproteobacteria
B19_NODE_3077_length_20870_cov_41.238242	0	0.000246497	0	UG_enriched	Sphingobacteriia
B19_NODE_3079_length_20851_cov_11.958790	0	7.36265e-05	0	UG_enriched	Thermoleophilia
B19_NODE_3081_length_20833_cov_9.217682	0	8.31415e-05	0	UG_enriched	Spirochaetia
B19_NODE_3083_length_20827_cov_16.116840	0	0.00030085	0	UG_enriched	NAmissing
B19_NODE_3084_length_20827_cov_15.731321	0	0.000572849	0	UG_enriched	Acidobacteriia
B19_NODE_3087_length_20789_cov_104.907543	0	0.000682811	0	UG_enriched	Acidobacteriia
B19_NODE_3088_length_20787_cov_9.864991	0	0.000101637	0	UG_enriched	Verrucomicrobiae
B19_NODE_308_length_57851_cov_12.242318	0	7.56858e-05	0	UG_enriched	Verrucomicrobiae
B19_NODE_3093_length_20741_cov_9.565358	0	6.18442e-05	0	UG_enriched	Gammaproteobacteria
B19_NODE_3095_length_20711_cov_11.651723	0	7.70695e-05	0	UG_enriched	Betaproteobacteria
B19_NODE_3098_length_20685_cov_9.691323	0	5.80796e-05	0	UG_enriched	Gammaproteobacteria
B19_NODE_309_length_57840_cov_16.978507	0	0.00018098	0	UG_enriched	Acidobacteriia
B19_NODE_30_length_97634_cov_47.458234	0	0.000279524	0	UG_enriched	Vicinamibacteria
B19_NODE_3102_length_20674_cov_23.462244	0	0.000234593	0	UG_enriched	Gammaproteobacteria
B19_NODE_3103_length_20673_cov_16.219662	0	9.16371e-05	0	UG_enriched	Acidobacteriia
B19_NODE_3104_length_20669_cov_91.412681	0	0.000546895	0	UG_enriched	Betaproteobacteria
B19_NODE_3105_length_20655_cov_8.802864	0	5.13549e-05	0	UG_enriched	Planctomycetia
B19_NODE_3106_length_20654_cov_25.362688	0	0.00014595	0	UG_enriched	Alphaproteobacteria
B19_NODE_3107_length_20650_cov_54.973052	0	0.000314358	0	UG_enriched	Thermoprotei
B19_NODE_310_length_57824_cov_26.148696	0	0.000152409	0	UG_enriched	Verrucomicrobiae
B19_NODE_3110_length_20632_cov_13.239053	0	0.00023877	0	UG_enriched	Acidobacteriia
B19_NODE_3111_length_20622_cov_8.774396	0	5.13549e-05	0	UG_enriched	Betaproteobacteria
B19_NODE_3113_length_20611_cov_12.945709	0	0.000121554	0	UG_enriched	Actinobacteria
B19_NODE_3114_length_20608_cov_8.803873	0	5.28698e-05	0	UG_enriched	Deltaproteobacteria
B19_NODE_3116_length_20593_cov_49.480865	0	0.001034	0	UG_enriched	Actinobacteria
B19_NODE_3117_length_20583_cov_9.532638	0	5.51568e-05	0	UG_enriched	Betaproteobacteria
B19_NODE_3119_length_20569_cov_13.211124	0	7.7684e-05	0.00194395	UG_enriched	Vicinamibacteria
B19_NODE_311_length_57794_cov_13.242592	0	0.000131922	0	UG_enriched	Verrucomicrobiae
B19_NODE_3120_length_20568_cov_9.228635	0	0.000116133	0	UG_enriched	Planctomycetia
B19_NODE_3122_length_20554_cov_11.539929	0	7.51026e-05	0	UG_enriched	Betaproteobacteria
B19_NODE_3126_length_20528_cov_11.107703	0	9.69652e-05	0	UG_enriched	Deltaproteobacteria
B19_NODE_3127_length_20526_cov_11.599922	0	0.000129123	0	UG_enriched	Alphaproteobacteria
B19_NODE_3129_length_20520_cov_10.768238	0	6.68868e-05	0	UG_enriched	Gammaproteobacteria
B19_NODE_312_length_57512_cov_177.752650	0	0.00126124	0	UG_enriched	Oligoflexia
B19_NODE_3131_length_20501_cov_18.414360	0	0.000492742	0	UG_enriched	Actinobacteria
B19_NODE_3133_length_20495_cov_10.619325	0	0.000127605	0	UG_enriched	Actinobacteria
B19_NODE_3134_length_20493_cov_43.677464	0	0.000827244	0	UG_enriched	Betaproteobacteria
B19_NODE_3135_length_20493_cov_9.409042	0	0.000127639	0	UG_enriched	Acidobacteriia
B19_NODE_313_length_57407_cov_25.755545	0	0.000327777	0	UG_enriched	Betaproteobacteria
B19_NODE_3141_length_20440_cov_36.462742	0	0.000212554	0	UG_enriched	Bacilli
B19_NODE_3142_length_20436_cov_10.260586	0	0.000119696	0	UG_enriched	Deltaproteobacteria
B19_NODE_3145_length_20421_cov_14.461063	0	9.54231e-05	0	UG_enriched	Alphaproteobacteria
B19_NODE_3146_length_20419_cov_10.175850	0	0.000146897	0	UG_enriched	Clostridia
B19_NODE_3148_length_20408_cov_18.437724	0	0.000383342	0	UG_enriched	Deltaproteobacteria
B19_NODE_3149_length_20405_cov_72.469287	0	0.00160467	0	UG_enriched	Vicinamibacteria
B19_NODE_314_length_57365_cov_16.326662	0	0.000294209	0	UG_enriched	Acidobacteriia
B19_NODE_3150_length_20402_cov_11.113481	0	0.000102588	0	UG_enriched	Deltaproteobacteria
B19_NODE_3152_length_20384_cov_9.504993	0	5.62772e-05	0	UG_enriched	Deltaproteobacteria
B19_NODE_3153_length_20379_cov_8.866365	0	5.42954e-05	0	UG_enriched	Alphaproteobacteria
B19_NODE_3155_length_20372_cov_15.556972	0	9.532e-05	0	UG_enriched	Verrucomicrobiae
B19_NODE_3156_length_20371_cov_12.703928	0	0.000121892	0	UG_enriched	Deltaproteobacteria
B19_NODE_3157_length_20369_cov_25.717141	0	0.00014924	0	UG_enriched	Actinobacteria
B19_NODE_3158_length_20369_cov_17.294772	0	0.000108811	0	UG_enriched	Actinobacteria
B19_NODE_315_length_57355_cov_43.705969	0	0.000495683	0	UG_enriched	Acidobacteriia
B19_NODE_3160_length_20355_cov_15.770788	0	0.000190919	0	UG_enriched	Actinobacteria
B19_NODE_3161_length_20353_cov_12.799734	0	7.29304e-05	0	UG_enriched	Betaproteobacteria
B19_NODE_3162_length_20353_cov_10.928614	0	0.000144389	0	UG_enriched	Actinobacteria
B19_NODE_3164_length_20344_cov_9.863670	0	0.00010309	0	UG_enriched	Actinobacteria
B19_NODE_3165_length_20343_cov_10.507541	0	5.91393e-05	0	UG_enriched	Thermoleophilia
B19_NODE_3166_length_20340_cov_13.769534	0	0.00011407	0	UG_enriched	Betaproteobacteria
B19_NODE_316_length_57332_cov_31.508372	0	0.000313295	0.000170997	UG_enriched	Deltaproteobacteria
B19_NODE_3171_length_20309_cov_20.128962	0	0.000118977	0	UG_enriched	Gammaproteobacteria
B19_NODE_3174_length_20290_cov_13.683716	0	0.000135073	0	UG_enriched	Alphaproteobacteria
B19_NODE_3176_length_20264_cov_30.931417	0	0.000196004	0	UG_enriched	Gammaproteobacteria
B19_NODE_3178_length_20217_cov_7.587144	0	4.71034e-05	0	UG_enriched	Bacilli
B19_NODE_3179_length_20215_cov_11.461161	0	6.58004e-05	0	UG_enriched	Actinobacteria
B19_NODE_317_length_57319_cov_44.871106	0	0.000259141	0	UG_enriched	Gammaproteobacteria
B19_NODE_3180_length_20205_cov_12.602432	0	7.28776e-05	0	UG_enriched	Betaproteobacteria
B19_NODE_3182_length_20186_cov_11.754359	0	7.1771e-05	0	UG_enriched	Flavobacteriia
B19_NODE_3183_length_20179_cov_13.319718	0	8.41397e-05	0	UG_enriched	Betaproteobacteria
B19_NODE_3184_length_20174_cov_60.529002	0	0.000480237	0	UG_enriched	Acidimicrobiia
B19_NODE_3186_length_20155_cov_90.497463	0	0.000531754	0	UG_enriched	Clostridia
B19_NODE_3188_length_20152_cov_9.035776	0	5.52434e-05	0	UG_enriched	Cytophagia
B19_NODE_3189_length_20151_cov_14.046925	0	8.96383e-05	0	UG_enriched	Actinobacteria
B19_NODE_318_length_57251_cov_34.772991	0	0.000206322	0	UG_enriched	Actinobacteria
B19_NODE_3191_length_20142_cov_8.710410	0	5.68692e-05	0	UG_enriched	Alphaproteobacteria
B19_NODE_3192_length_20134_cov_38.924299	0	0.00030998	0	UG_enriched	Actinobacteria
B19_NODE_3193_length_20126_cov_28.393852	0	0.0016278	0	UG_enriched	Gammaproteobacteria
B19_NODE_3197_length_20113_cov_15.984495	0	0.000386103	0	UG_enriched	Alphaproteobacteria
B19_NODE_3198_length_20112_cov_60.304283	0	0.000349391	0	UG_enriched	Acidobacteriia
B19_NODE_31_length_97326_cov_18.360385	0	0.000107038	0	UG_enriched	Clostridia
B19_NODE_3202_length_20081_cov_18.316089	0	0.000128626	0	UG_enriched	Vicinamibacteria
B19_NODE_3207_length_20066_cov_10.773625	0	0.000130287	0	UG_enriched	Gammaproteobacteria
B19_NODE_3208_length_20055_cov_11.788950	0	6.63254e-05	0	UG_enriched	Actinobacteria
B19_NODE_320_length_57199_cov_11.751820	0	0.000131614	0	UG_enriched	Betaproteobacteria
B19_NODE_3210_length_20009_cov_14.096322	0	9.3069e-05	0	UG_enriched	Actinobacteria
B19_NODE_3212_length_19986_cov_7.867292	0	4.875e-05	0	UG_enriched	Betaproteobacteria
B19_NODE_3214_length_19965_cov_8.634103	0	5.34693e-05	0	UG_enriched	Flavobacteriia
B19_NODE_3215_length_19960_cov_23.024366	0	0.000136678	0	UG_enriched	Actinobacteria
B19_NODE_3219_length_19942_cov_15.023080	0	9.2447e-05	0	UG_enriched	Bacilli
B19_NODE_321_length_57167_cov_33.358349	0	0.000198474	0	UG_enriched	Verrucomicrobiae
B19_NODE_3220_length_19941_cov_37.048879	0	0.00026121	0	UG_enriched	Betaproteobacteria
B19_NODE_3221_length_19936_cov_12.931241	0	0.000123818	0	UG_enriched	Fimbriimonadia
B19_NODE_3230_length_19883_cov_9.151705	0	5.42863e-05	0	UG_enriched	Gammaproteobacteria
B19_NODE_3231_length_19879_cov_14.744451	0	8.85633e-05	0	UG_enriched	NAmissing
B19_NODE_3232_length_19878_cov_12.338243	0	7.47584e-05	0	UG_enriched	Betaproteobacteria
B19_NODE_3233_length_19873_cov_45.401605	0	0.000267731	0	UG_enriched	Bacilli
B19_NODE_3234_length_19869_cov_14.775815	0	8.55377e-05	0	UG_enriched	Actinobacteria
B19_NODE_3236_length_19861_cov_25.658740	0.000103906	0.000186007	0	UG_enriched	Acidobacteriia
B19_NODE_3237_length_19854_cov_7.734482	0	4.45508e-05	0	UG_enriched	Bacteroidia
B19_NODE_3238_length_19853_cov_22.401303	0	0.000346158	0	UG_enriched	Verrucomicrobiae
B19_NODE_323_length_57103_cov_33.844885	0	0.000199497	0	UG_enriched	NAmissing
B19_NODE_3240_length_19850_cov_8.414196	0	5.51448e-05	0	UG_enriched	Gammaproteobacteria
B19_NODE_3243_length_19840_cov_9.023503	0	5.10731e-05	0	UG_enriched	NAmissing
B19_NODE_3245_length_19829_cov_9.398402	0	8.03229e-05	0	UG_enriched	Acidobacteriia
B19_NODE_3248_length_19811_cov_15.899676	0	0.000228188	0	UG_enriched	Betaproteobacteria
B19_NODE_324_length_56986_cov_11.903743	0	7.13337e-05	0	UG_enriched	Thermoleophilia
B19_NODE_3251_length_19796_cov_34.296084	0	0.000194218	0	UG_enriched	Verrucomicrobiae
B19_NODE_3254_length_19788_cov_20.100846	0	0.000134954	0	UG_enriched	NAmissing
B19_NODE_3255_length_19787_cov_19.070545	0	0.000113552	0	UG_enriched	Gammaproteobacteria
B19_NODE_3257_length_19780_cov_11.842636	0	7.10168e-05	0	UG_enriched	Acidobacteriia
B19_NODE_3258_length_19776_cov_8.607880	0	0.000100856	0	UG_enriched	Alphaproteobacteria
B19_NODE_3260_length_19774_cov_11.423247	0	0.000171625	0	UG_enriched	Deltaproteobacteria
B19_NODE_3261_length_19768_cov_9.286816	0	5.52022e-05	0	UG_enriched	Planctomycetia
B19_NODE_3266_length_19739_cov_15.883459	0	0.000170017	0	UG_enriched	Betaproteobacteria
B19_NODE_3267_length_19738_cov_13.199309	0	7.39151e-05	0	UG_enriched	Planctomycetia
B19_NODE_3268_length_19728_cov_7.579119	0	4.70685e-05	0	UG_enriched	Bacilli
B19_NODE_3269_length_19717_cov_14.018513	0	8.12986e-05	0	UG_enriched	Betaproteobacteria
B19_NODE_326_length_56963_cov_150.598264	0	0.00125385	0	UG_enriched	Acidobacteriia
B19_NODE_3270_length_19710_cov_25.726177	0	0.000193071	0	UG_enriched	Actinobacteria
B19_NODE_3271_length_19700_cov_20.821889	0	0.000147954	0	UG_enriched	Acidobacteriia
B19_NODE_3272_length_19699_cov_9.464620	0	5.94383e-05	0	UG_enriched	Vicinamibacteria
B19_NODE_3273_length_19685_cov_10.208915	0	0.000103438	0	UG_enriched	Gammaproteobacteria
B19_NODE_3279_length_19648_cov_11.254172	0	6.13175e-05	0	UG_enriched	Acidobacteriia
B19_NODE_327_length_56934_cov_203.280525	0	0.000911313	0	UG_enriched	Opitutae
B19_NODE_3284_length_19618_cov_10.623933	0	6.32251e-05	0	UG_enriched	Planctomycetia
B19_NODE_3285_length_19598_cov_9.526531	0	5.64591e-05	0	UG_enriched	Acidobacteriia
B19_NODE_3288_length_19557_cov_11.555430	0	0.000485726	0	UG_enriched	Acidobacteriia
B19_NODE_328_length_56907_cov_174.511732	0	0.00351163	0	UG_enriched	Vicinamibacteria
B19_NODE_3291_length_19537_cov_9.963607	0	6.13189e-05	0	UG_enriched	Actinobacteria
B19_NODE_3292_length_19536_cov_21.786869	0	0.00012993	0	UG_enriched	Acidobacteriia
B19_NODE_3293_length_19531_cov_11.612446	9.24543e-05	6.94062e-05	0	FO_enriched	Gammaproteobacteria
B19_NODE_3297_length_19499_cov_9.625026	0	5.51816e-05	0	UG_enriched	Bacilli
B19_NODE_3299_length_19493_cov_17.196059	0	0.000214131	0	UG_enriched	Gammaproteobacteria
B19_NODE_329_length_56885_cov_17.799455	0	0.000134782	0	UG_enriched	Deltaproteobacteria
B19_NODE_32_length_96528_cov_14.904377	0	0.000126269	0	UG_enriched	Deltaproteobacteria
B19_NODE_3300_length_19490_cov_59.121019	0	0.000306465	0	UG_enriched	Actinobacteria
B19_NODE_3301_length_19484_cov_13.161099	0	7.69658e-05	0	UG_enriched	Actinobacteria
B19_NODE_330_length_56821_cov_9.729556	0	8.74819e-05	0	UG_enriched	Deltaproteobacteria
B19_NODE_3312_length_19395_cov_18.686401	0	0.000111916	0	UG_enriched	Deltaproteobacteria
B19_NODE_3314_length_19388_cov_11.992914	0	9.40883e-05	0	UG_enriched	Gammaproteobacteria
B19_NODE_3316_length_19386_cov_10.219906	0	6.10099e-05	0	UG_enriched	Betaproteobacteria
B19_NODE_3318_length_19360_cov_17.840352	0	0.000100915	0	UG_enriched	Actinobacteria
B19_NODE_331_length_56807_cov_69.032915	0	0.000570122	0	UG_enriched	Actinobacteria
B19_NODE_3320_length_19356_cov_42.168178	0	0.000263239	0	UG_enriched	Thermoleophilia
B19_NODE_3322_length_19344_cov_9.125356	0	0.000124627	0	UG_enriched	Alphaproteobacteria
B19_NODE_3325_length_19323_cov_13.217718	0	8.56748e-05	0	UG_enriched	Actinobacteria
B19_NODE_3326_length_19310_cov_9.079356	0	4.87016e-05	0	UG_enriched	Planctomycetia
B19_NODE_3327_length_19308_cov_16.250143	0	9.75011e-05	0	UG_enriched	Actinobacteria
B19_NODE_3328_length_19301_cov_51.898524	0	0.000630435	0	UG_enriched	Betaproteobacteria
B19_NODE_332_length_56631_cov_22.285810	0	0.000420916	0	UG_enriched	NAmissing
B19_NODE_3331_length_19294_cov_11.795883	0	6.47259e-05	0	UG_enriched	Chloroflexia
B19_NODE_3332_length_19292_cov_29.507408	0	0.000912719	0	UG_enriched	Betaproteobacteria
B19_NODE_3333_length_19289_cov_21.744255	0	0.000279644	0	UG_enriched	Betaproteobacteria
B19_NODE_3335_length_19263_cov_12.370887	0	0.00010718	0	UG_enriched	Deltaproteobacteria
B19_NODE_3336_length_19249_cov_7.846567	0	5.13208e-05	0	UG_enriched	Alphaproteobacteria
B19_NODE_3337_length_19243_cov_11.163227	0	7.17658e-05	0	UG_enriched	Betaproteobacteria
B19_NODE_3338_length_19218_cov_10.009967	0	6.30421e-05	0	UG_enriched	Betaproteobacteria
B19_NODE_333_length_56615_cov_88.672153	0	0.000597368	0	UG_enriched	Alphaproteobacteria
B19_NODE_3340_length_19201_cov_13.972893	0	0.000162532	0	UG_enriched	Actinobacteria
B19_NODE_3342_length_19188_cov_75.014948	0	0.000578496	0	UG_enriched	Alphaproteobacteria
B19_NODE_3343_length_19176_cov_10.230793	0	0.000133167	0	UG_enriched	Deltaproteobacteria
B19_NODE_3346_length_19151_cov_16.652336	0	0.00012856	0	UG_enriched	Actinobacteria
B19_NODE_3347_length_19138_cov_10.020018	0	6.34827e-05	0	UG_enriched	Alphaproteobacteria
B19_NODE_334_length_56421_cov_11.129032	0	0.000109645	0	UG_enriched	Gammaproteobacteria
B19_NODE_3350_length_19123_cov_16.307846	0	9.43684e-05	0	UG_enriched	Actinobacteria
B19_NODE_3356_length_19073_cov_16.473709	0	0.000101012	0	UG_enriched	Betaproteobacteria
B19_NODE_3357_length_19067_cov_10.357248	0	0.000115653	0	UG_enriched	Actinobacteria
B19_NODE_3359_length_19055_cov_11.090105	0	7.17625e-05	0	UG_enriched	Deltaproteobacteria
B19_NODE_335_length_56267_cov_48.968911	0	0.00168986	0	UG_enriched	Actinobacteria
B19_NODE_3360_length_19054_cov_10.091321	0	6.08279e-05	0	UG_enriched	Gammaproteobacteria
B19_NODE_3367_length_19013_cov_7.240057	0	4.55411e-05	0	UG_enriched	Acidobacteriia
B19_NODE_3369_length_19012_cov_8.612966	0	0.000147981	0	UG_enriched	Bacilli
B19_NODE_336_length_56258_cov_33.950270	0	0.000199271	0	UG_enriched	Betaproteobacteria
B19_NODE_3373_length_18978_cov_58.798658	0	0.000334375	0	UG_enriched	Actinobacteria
B19_NODE_3377_length_18949_cov_17.756060	0	0.000103909	0	UG_enriched	Alphaproteobacteria
B19_NODE_3378_length_18944_cov_10.620626	0	5.7156e-05	0	UG_enriched	Betaproteobacteria
B19_NODE_3379_length_18942_cov_13.823476	0	8.35514e-05	0	UG_enriched	Alphaproteobacteria
B19_NODE_337_length_56140_cov_12.458269	0	7.37669e-05	0	UG_enriched	Gammaproteobacteria
B19_NODE_3381_length_18936_cov_8.776972	0	5.04689e-05	0	UG_enriched	Gammaproteobacteria
B19_NODE_3382_length_18935_cov_13.371186	0	7.8213e-05	0	UG_enriched	Acidobacteriia
B19_NODE_3383_length_18928_cov_10.136120	0	6.07852e-05	0	UG_enriched	Bacteroidia
B19_NODE_3384_length_18927_cov_15.203635	0	0.000200064	0	UG_enriched	Deltaproteobacteria
B19_NODE_3388_length_18902_cov_12.318035	0	0.000125701	0	UG_enriched	Deltaproteobacteria
B19_NODE_3389_length_18898_cov_12.065807	0	7.28967e-05	0	UG_enriched	Gammaproteobacteria
B19_NODE_3390_length_18896_cov_90.076164	0	0.00130041	0	UG_enriched	Actinobacteria
B19_NODE_3391_length_18893_cov_9.408111	0	0.00011252	0	UG_enriched	Acidobacteriia
B19_NODE_3393_length_18890_cov_11.010990	0	6.18942e-05	0	UG_enriched	NAmissing
B19_NODE_3394_length_18890_cov_10.581418	0	0.00108231	0	UG_enriched	Actinobacteria
B19_NODE_3396_length_18880_cov_11.229004	0	6.28245e-05	0	UG_enriched	Gammaproteobacteria
B19_NODE_339_length_56039_cov_15.155455	0	0.000149034	0	UG_enriched	Alphaproteobacteria
B19_NODE_3400_length_18866_cov_9.062517	0	5.25423e-05	0	UG_enriched	Cytophagia
B19_NODE_3402_length_18847_cov_10.063697	0	6.41033e-05	0	UG_enriched	Sphingobacteriia
B19_NODE_3403_length_18836_cov_29.661307	0	0.000181447	0	UG_enriched	Betaproteobacteria
B19_NODE_3405_length_18824_cov_14.390644	0	8.67757e-05	0	UG_enriched	Acidobacteriia
B19_NODE_340_length_56021_cov_48.057106	0	0.000398141	0	UG_enriched	Actinobacteria
B19_NODE_3411_length_18786_cov_63.410389	0	0.000413517	0	UG_enriched	Actinobacteria
B19_NODE_3412_length_18781_cov_16.034604	0	0.000231797	0	UG_enriched	Thermoleophilia
B19_NODE_3413_length_18781_cov_11.019652	0	0.000125266	0	UG_enriched	Chloroflexia
B19_NODE_3414_length_18776_cov_11.839058	0	0.000141192	0	UG_enriched	Alphaproteobacteria
B19_NODE_3416_length_18765_cov_9.148103	0	0.000184606	0	UG_enriched	Alphaproteobacteria
B19_NODE_3419_length_18760_cov_59.364234	0	0.000415454	0	UG_enriched	Actinobacteria
B19_NODE_341_length_55996_cov_49.436013	0	0.000823639	0	UG_enriched	Vicinamibacteria
B19_NODE_3426_length_18706_cov_20.135435	0	0.000123647	0	UG_enriched	Gammaproteobacteria
B19_NODE_3428_length_18703_cov_15.726834	0	0.00014489	0	UG_enriched	NAmissing
B19_NODE_3429_length_18703_cov_10.689296	0	6.4325e-05	0	UG_enriched	NAmissing
B19_NODE_342_length_55868_cov_15.135864	0	0.000238441	0	UG_enriched	Verrucomicrobiae
B19_NODE_3430_length_18686_cov_17.278997	0	0.000206688	0	UG_enriched	Betaproteobacteria
B19_NODE_3431_length_18684_cov_10.651672	0	6.05814e-05	0	UG_enriched	Clostridia
B19_NODE_3432_length_18680_cov_10.281664	0	5.90523e-05	0	UG_enriched	Alphaproteobacteria
B19_NODE_3433_length_18671_cov_11.404276	4.00905e-05	0.000121453	0	FO_enriched	Verrucomicrobiae
B19_NODE_3435_length_18664_cov_14.408243	0	8.14368e-05	0	UG_enriched	Alphaproteobacteria
B19_NODE_3438_length_18648_cov_18.109665	0	0.000100407	0	UG_enriched	Acidobacteriia
B19_NODE_343_length_55862_cov_29.558192	0	0.000173354	0	UG_enriched	Bacilli
B19_NODE_3440_length_18637_cov_169.391562	0	0.00101873	0	UG_enriched	Betaproteobacteria
B19_NODE_3441_length_18637_cov_33.573566	0	0.000224844	0	UG_enriched	Alphaproteobacteria
B19_NODE_3443_length_18629_cov_10.018682	0	6.44896e-05	0	UG_enriched	Vicinamibacteria
B19_NODE_3444_length_18625_cov_9.329833	0	5.65883e-05	0	UG_enriched	Actinobacteria
B19_NODE_344_length_55836_cov_26.514512	0	0.000157988	0	UG_enriched	Bacilli
B19_NODE_3453_length_18604_cov_18.113052	0	0.00010784	0	UG_enriched	Alphaproteobacteria
B19_NODE_3454_length_18593_cov_8.407272	0	4.67521e-05	0	UG_enriched	Bacilli
B19_NODE_3455_length_18586_cov_13.615617	0	7.88611e-05	0	UG_enriched	Alphaproteobacteria
B19_NODE_345_length_55788_cov_11.981788	0	0.000192885	0	UG_enriched	Deltaproteobacteria
B19_NODE_3461_length_18568_cov_9.489818	0	8.35801e-05	0	UG_enriched	Vicinamibacteria
B19_NODE_3462_length_18565_cov_204.803079	0	0.00118281	0	UG_enriched	Actinobacteria
B19_NODE_3464_length_18528_cov_11.538570	0	0.000119567	0	UG_enriched	Deltaproteobacteria
B19_NODE_3465_length_18521_cov_11.804993	0	9.34051e-05	0	UG_enriched	Actinobacteria
B19_NODE_3466_length_18516_cov_7.541737	0	4.55738e-05	0	UG_enriched	Sphingobacteriia
B19_NODE_3469_length_18510_cov_11.824709	0	0.000138697	0	UG_enriched	Betaproteobacteria
B19_NODE_3473_length_18484_cov_23.623528	0	0.000145025	0	UG_enriched	NAmissing
B19_NODE_3474_length_18484_cov_19.243583	0	0.000113948	0	UG_enriched	Clostridia
B19_NODE_3475_length_18478_cov_7.468111	0	6.68651e-05	0	UG_enriched	Actinobacteria
B19_NODE_3477_length_18477_cov_11.459179	0	6.30943e-05	0	UG_enriched	Deltaproteobacteria
B19_NODE_3480_length_18463_cov_153.060463	0	0.0012378	0	UG_enriched	Actinobacteria
B19_NODE_3484_length_18438_cov_16.719523	0	9.84257e-05	0	UG_enriched	Betaproteobacteria
B19_NODE_3485_length_18437_cov_20.216679	0	0.00013023	0	UG_enriched	Betaproteobacteria
B19_NODE_3487_length_18432_cov_9.436415	0	5.571e-05	0	UG_enriched	Actinobacteria
B19_NODE_3494_length_18410_cov_8.736039	0	4.96098e-05	0	UG_enriched	Gammaproteobacteria
B19_NODE_3495_length_18400_cov_17.458108	0	0.000108483	0	UG_enriched	Actinobacteria
B19_NODE_3499_length_18353_cov_7.035742	0	3.75768e-05	0	UG_enriched	Bacilli
B19_NODE_349_length_55501_cov_17.523338	0	0.000103589	0	UG_enriched	Clostridia
B19_NODE_3504_length_18330_cov_24.072613	0	0.000169334	0	UG_enriched	Planctomycetia
B19_NODE_3505_length_18330_cov_9.108564	0	0.000152803	0	UG_enriched	Spirochaetia
B19_NODE_3506_length_18330_cov_8.319015	0	5.04735e-05	0	UG_enriched	Alphaproteobacteria
B19_NODE_3508_length_18317_cov_34.458931	0	0.000351803	0	UG_enriched	Betaproteobacteria
B19_NODE_350_length_55474_cov_17.264278	0	0.00013673	0	UG_enriched	Acidobacteriia
B19_NODE_3511_length_18305_cov_221.484548	0	0.00162786	0	UG_enriched	Actinobacteria
B19_NODE_3515_length_18277_cov_30.263034	0	0.000179673	0	UG_enriched	Deltaproteobacteria
B19_NODE_3516_length_18269_cov_12.168167	0	7.01197e-05	0	UG_enriched	Bacilli
B19_NODE_351_length_55349_cov_15.765182	0	0.000214366	0	UG_enriched	Opitutae
B19_NODE_3523_length_18217_cov_12.001927	0	7.54357e-05	0	UG_enriched	Bacilli
B19_NODE_3526_length_18200_cov_10.538330	0	6.22856e-05	0	UG_enriched	Alphaproteobacteria
B19_NODE_3527_length_18194_cov_13.432383	0	8.06534e-05	0	UG_enriched	Bacilli
B19_NODE_3528_length_18194_cov_12.987100	0	7.57173e-05	0	UG_enriched	Betaproteobacteria
B19_NODE_352_length_55337_cov_27.525976	0	0.000164005	0	UG_enriched	Bacilli
B19_NODE_3530_length_18179_cov_8.072666	0	8.58709e-05	0	UG_enriched	Planctomycetia
B19_NODE_3531_length_18177_cov_84.209855	0	0.00220691	0	UG_enriched	Alphaproteobacteria
B19_NODE_3532_length_18176_cov_43.474091	0	0.00026243	0	UG_enriched	Sphingobacteriia
B19_NODE_3533_length_18173_cov_40.721216	0	0.000196747	0	UG_enriched	Betaproteobacteria
B19_NODE_3535_length_18171_cov_8.749724	0	0.0202575	0	UG_enriched	Gammaproteobacteria
B19_NODE_353_length_55337_cov_12.998209	0	7.34288e-05	0	UG_enriched	Gammaproteobacteria
B19_NODE_3540_length_18143_cov_7.834421	0	4.17476e-05	0	UG_enriched	Alphaproteobacteria
B19_NODE_3541_length_18139_cov_19.805187	0	0.000114901	0	UG_enriched	Betaproteobacteria
B19_NODE_3544_length_18135_cov_18.870796	0	0.000117636	0	UG_enriched	Actinobacteria
B19_NODE_3547_length_18127_cov_9.787129	0	5.84234e-05	0	UG_enriched	NAmissing
B19_NODE_3549_length_18121_cov_11.385893	0	7.12534e-05	0	UG_enriched	Gammaproteobacteria
B19_NODE_354_length_55316_cov_12.757659	0	7.7684e-05	0	UG_enriched	Gammaproteobacteria
B19_NODE_3550_length_18118_cov_10.610751	0	9.9295e-05	0	UG_enriched	NAmissing
B19_NODE_3554_length_18101_cov_10.915327	0	7.60127e-05	0	UG_enriched	Bacilli
B19_NODE_355_length_55309_cov_65.814891	0	0.000792849	0	UG_enriched	Alphaproteobacteria
B19_NODE_3561_length_18067_cov_11.248112	0	6.3213e-05	0	UG_enriched	Tissierellia
B19_NODE_3563_length_18063_cov_11.669203	0	0.000131934	0	UG_enriched	Deltaproteobacteria
B19_NODE_3564_length_18062_cov_8.807131	0	5.58192e-05	0	UG_enriched	Gammaproteobacteria
B19_NODE_3566_length_18056_cov_9.565857	0	5.72455e-05	0	UG_enriched	Bacilli
B19_NODE_3567_length_18047_cov_11.001167	0	6.61938e-05	0	UG_enriched	Actinobacteria
B19_NODE_3568_length_18044_cov_23.026850	0	0.000139265	0	UG_enriched	Acidobacteriia
B19_NODE_3569_length_18037_cov_10.934045	0	0.000720123	0	UG_enriched	Actinobacteria
B19_NODE_356_length_55290_cov_31.740925	0	0.000193014	0	UG_enriched	Gammaproteobacteria
B19_NODE_3571_length_18037_cov_8.823156	0	8.79823e-05	0	UG_enriched	Actinobacteria
B19_NODE_3572_length_18036_cov_12.439686	0	7.74141e-05	0	UG_enriched	Actinobacteria
B19_NODE_3573_length_18030_cov_15.716439	0	9.19128e-05	0	UG_enriched	Acidobacteriia
B19_NODE_3574_length_18028_cov_8.806988	0	5.63005e-05	0	UG_enriched	Gammaproteobacteria
B19_NODE_3576_length_18021_cov_51.864800	0	0.000441636	0	UG_enriched	Betaproteobacteria
B19_NODE_3577_length_18021_cov_10.872815	0	5.95193e-05	0	UG_enriched	Actinobacteria
B19_NODE_3585_length_17998_cov_14.975199	0	0.000336155	0	UG_enriched	Gammaproteobacteria
B19_NODE_3587_length_17990_cov_9.743797	0	5.89625e-05	0	UG_enriched	Verrucomicrobiae
B19_NODE_358_length_55279_cov_14.831160	0	8.1445e-05	0	UG_enriched	Bacilli
B19_NODE_3591_length_17975_cov_151.718192	0	0.000899222	0	UG_enriched	Gammaproteobacteria
B19_NODE_3594_length_17965_cov_44.539308	0	0.00112104	0	UG_enriched	Gammaproteobacteria
B19_NODE_35_length_94545_cov_101.346439	0	0.000600882	0	UG_enriched	Clostridia
B19_NODE_3601_length_17937_cov_10.328766	0	0.000125763	0	UG_enriched	Actinobacteria
B19_NODE_3604_length_17917_cov_296.800302	0	0.00188915	0	UG_enriched	Gammaproteobacteria
B19_NODE_3605_length_17916_cov_11.907956	0	0.00012774	0	UG_enriched	Alphaproteobacteria
B19_NODE_360_length_55117_cov_15.643239	0	9.60721e-05	0	UG_enriched	NAmissing
B19_NODE_3610_length_17897_cov_12.575944	0	0.000155047	0	UG_enriched	Alphaproteobacteria
B19_NODE_3611_length_17889_cov_22.341202	0	0.000147386	0	UG_enriched	Nitrospira
B19_NODE_3613_length_17882_cov_11.436024	0	0.000103474	0	UG_enriched	Betaproteobacteria
B19_NODE_3615_length_17862_cov_10.938844	0	0.000177538	0	UG_enriched	Gammaproteobacteria
B19_NODE_3617_length_17860_cov_14.992306	0	8.94671e-05	0	UG_enriched	Betaproteobacteria
B19_NODE_3618_length_17855_cov_24.902079	0	0.000338965	0	UG_enriched	Actinobacteria
B19_NODE_3619_length_17853_cov_11.173840	0	6.60588e-05	0	UG_enriched	Betaproteobacteria
B19_NODE_361_length_55091_cov_46.922378	0	0.000670158	0	UG_enriched	Betaproteobacteria
B19_NODE_3623_length_17842_cov_21.032833	0	0.00037942	0	UG_enriched	Actinobacteria
B19_NODE_3624_length_17834_cov_18.720175	0	0.000128173	0	UG_enriched	Alphaproteobacteria
B19_NODE_3626_length_17825_cov_52.492178	0	0.000537039	0	UG_enriched	Acidobacteriia
B19_NODE_3628_length_17819_cov_7.978045	0	4.46938e-05	0	UG_enriched	Bacilli
B19_NODE_3629_length_17817_cov_10.708760	0	0.000138857	0	UG_enriched	Actinobacteria
B19_NODE_362_length_55063_cov_11.777160	0	7.084e-05	0	UG_enriched	Epsilonproteobacteria
B19_NODE_3630_length_17815_cov_11.686824	0	0.000143723	0	UG_enriched	Actinobacteria
B19_NODE_3633_length_17793_cov_10.159432	0	6.26628e-05	0	UG_enriched	NAmissing
B19_NODE_3637_length_17779_cov_9.715583	0	5.80421e-05	0	UG_enriched	Alphaproteobacteria
B19_NODE_3639_length_17773_cov_19.552207	0	0.000149587	0	UG_enriched	Actinobacteria
B19_NODE_363_length_55024_cov_15.517655	0	9.6912e-05	0	UG_enriched	Betaproteobacteria
B19_NODE_3640_length_17770_cov_1403.035958	0	0.0861461	0	UG_enriched	Actinobacteria
B19_NODE_3642_length_17762_cov_21.720224	0	0.00015978	0	UG_enriched	Acidobacteriia
B19_NODE_3643_length_17756_cov_11.233716	0	0.000156673	0	UG_enriched	Actinobacteria
B19_NODE_3644_length_17751_cov_8.148791	0	5.00197e-05	0	UG_enriched	Cytophagia
B19_NODE_3647_length_17741_cov_12.871593	0	0.000146615	0	UG_enriched	Acidobacteriia
B19_NODE_364_length_54968_cov_101.267896	0	0.000624238	0	UG_enriched	Alphaproteobacteria
B19_NODE_3651_length_17713_cov_8.417318	0	4.61092e-05	0	UG_enriched	Clostridia
B19_NODE_3652_length_17712_cov_8.388911	0	9.47168e-05	0	UG_enriched	Acidobacteriia
B19_NODE_3653_length_17709_cov_10.897474	0	6.42996e-05	0	UG_enriched	Alphaproteobacteria
B19_NODE_3656_length_17704_cov_16.928608	0	0.000101071	0	UG_enriched	Verrucomicrobiae
B19_NODE_365_length_54919_cov_14.337963	0	0.0001238	0	UG_enriched	NAmissing
B19_NODE_3661_length_17689_cov_25.553816	0	0.000157386	0	UG_enriched	Betaproteobacteria
B19_NODE_3665_length_17672_cov_17.593404	0	0.000138583	0	UG_enriched	Betaproteobacteria
B19_NODE_3666_length_17654_cov_13.406614	0	8.43682e-05	0	UG_enriched	Betaproteobacteria
B19_NODE_366_length_54869_cov_45.612271	0	0.000269662	0	UG_enriched	Actinobacteria
B19_NODE_3672_length_17631_cov_14.932635	0	0.000102066	0	UG_enriched	Alphaproteobacteria
B19_NODE_3673_length_17622_cov_11.057266	0	6.26939e-05	0	UG_enriched	Thermoprotei
B19_NODE_3674_length_17619_cov_8.345024	0	5.2895e-05	0	UG_enriched	Spirochaetia
B19_NODE_3675_length_17614_cov_28.518594	0	0.000225428	0	UG_enriched	Actinobacteria
B19_NODE_3677_length_17614_cov_13.209294	0	7.80182e-05	0	UG_enriched	Acidobacteriia
B19_NODE_3678_length_17609_cov_14.486043	0	0.000114783	0	UG_enriched	Cytophagia
B19_NODE_3679_length_17605_cov_9.687009	0	5.20708e-05	0	UG_enriched	Gammaproteobacteria
B19_NODE_3681_length_17603_cov_8.973273	0	5.13066e-05	0	UG_enriched	Bacilli
B19_NODE_3684_length_17585_cov_24.101997	0	0.000150898	0	UG_enriched	Betaproteobacteria
B19_NODE_3685_length_17579_cov_7.867667	0	4.59787e-05	0	UG_enriched	Alphaproteobacteria
B19_NODE_3688_length_17562_cov_11.299823	0	5.5498e-05	0	UG_enriched	Betaproteobacteria
B19_NODE_3690_length_17546_cov_11.460180	0	0.000141202	0	UG_enriched	Vicinamibacteria
B19_NODE_3694_length_17528_cov_23.142735	0	0.000504203	0	UG_enriched	Actinobacteria
B19_NODE_36_length_94446_cov_29.248763	0	0.000541094	0	UG_enriched	Actinobacteria
B19_NODE_3705_length_17483_cov_11.563059	0	6.77476e-05	0	UG_enriched	Tissierellia
B19_NODE_3710_length_17469_cov_7.462674	0	4.60743e-05	0	UG_enriched	Alphaproteobacteria
B19_NODE_3711_length_17463_cov_9.082893	0	5.29794e-05	0	UG_enriched	Acidobacteriia
B19_NODE_3713_length_17463_cov_8.158605	0	5.15239e-05	0	UG_enriched	Acidobacteriia
B19_NODE_3714_length_17460_cov_8.911520	0	5.34737e-05	0	UG_enriched	Acidobacteriia
B19_NODE_3720_length_17421_cov_26.245940	0	0.000213132	0	UG_enriched	Acidobacteriia
B19_NODE_3721_length_17419_cov_9.778507	0	0.000104061	0	UG_enriched	Betaproteobacteria
B19_NODE_3722_length_17416_cov_13.500202	0	8.24077e-05	0	UG_enriched	Vicinamibacteria
B19_NODE_3726_length_17406_cov_12.336407	0	0.000132972	0	UG_enriched	Deltaproteobacteria
B19_NODE_3727_length_17404_cov_29.929910	0	0.0002771	0	UG_enriched	Alphaproteobacteria
B19_NODE_372_length_54633_cov_27.769852	0	0.000166708	0	UG_enriched	Deltaproteobacteria
B19_NODE_3732_length_17372_cov_12.563146	0	7.81296e-05	0	UG_enriched	Verrucomicrobiae
B19_NODE_3735_length_17355_cov_27.753757	0	0.000273158	0	UG_enriched	Betaproteobacteria
B19_NODE_3737_length_17352_cov_8.459964	0	9.40176e-05	0	UG_enriched	Verrucomicrobiae
B19_NODE_3738_length_17349_cov_50.946108	0	0.00101429	0	UG_enriched	Verrucomicrobiae
B19_NODE_3739_length_17344_cov_9.344323	0	5.25613e-05	0	UG_enriched	Bacteroidia
B19_NODE_373_length_54562_cov_15.364302	0	9.06208e-05	0	UG_enriched	Gammaproteobacteria
B19_NODE_3740_length_17341_cov_12.590131	0	7.51424e-05	0	UG_enriched	Flavobacteriia
B19_NODE_3742_length_17323_cov_9.394719	0	5.24294e-05	0	UG_enriched	Gammaproteobacteria
B19_NODE_3743_length_17316_cov_8.207172	0	0.000116876	0	UG_enriched	Deltaproteobacteria
B19_NODE_3745_length_17309_cov_13.017909	0	0.000668139	0	UG_enriched	Actinobacteria
B19_NODE_3746_length_17307_cov_12.367725	0	7.05905e-05	0	UG_enriched	Alphaproteobacteria
B19_NODE_3756_length_17279_cov_11.160474	0	6.81552e-05	0	UG_enriched	Acidobacteriia
[truncated: 6,911 more rows]
